# Supplementary material for: Catalytic enantioselective addition of organometallics to unprotected carboxylic acids
Source: PubMed Central journal article supplement (PMC6667444; doi:10.1038/s41467-019-11345-z), 2019-07-30
Supplement: 41467_2019_11345_MOESM1_ESM.pdf [file 41467_2019_11345_MOESM1_ESM.pdf]

1  
2  
3  
4  
5  
6  
7  
8  
9  
10

## Supplementary Information

### Catalytic enantioselective addition of organometallics to unprotected carboxylic acids

Yan *et al.*

1

## **Table of contents**

2 1. Supplementary Tables

3 2. Supplementary Methods

4 3. Supplementary Figures

5 4. Supplementary References

# 1 Supplementary Tables

2 **Supplementary Table 1.** Conjugate addition of EtMgBr to unsaturated carboxylic acids in  
 3 the absence of chiral catalyst and in the presence of various bases and silyl electrophiles  
 4 (investigating the reactivity of different metal carboxylates towards conjugate addition of  
 5 EtMgBr by changing addition sequence of the reagents).<sup>a</sup>

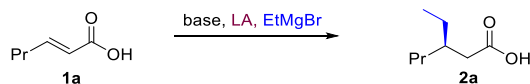

6

| Entry | T [°C] | Addition sequence of reagents <sup>b</sup> |                             |              | Conv. [%]       |
|-------|--------|--------------------------------------------|-----------------------------|--------------|-----------------|
|       |        | 1                                          | 2                           | 3            |                 |
| 1     | 0      | EtMgBr (2.5)                               | –                           | –            | 55 <sup>c</sup> |
| 2     | –55    | EtMgBr (2.5)                               | –                           | –            | 1               |
| 3     | –55    | EtMgBr (2.5)                               | Me <sub>3</sub> SiOTf (2.2) | –            | 6               |
| 4     | –55    | Me <sub>3</sub> SiOTf (2.2)                | EtMgBr (2.5)                | –            | 52              |
| 5     | –55    | EtMgBr (1.0)                               | Me <sub>3</sub> SiOTf (2.2) | EtMgBr (1.5) | 14              |
| 6     | –55    | <i>n</i> BuLi (1.0)                        | Me <sub>3</sub> SiOTf (2.2) | EtMgBr (1.5) | 74              |
| 7     | –55    | NaH (1.0)                                  | Me <sub>3</sub> SiOTf (2.2) | EtMgBr (1.5) | 66              |
| 8     | –78    | EtMgBr (2.5)                               | –                           | –            | 1               |
| 9     | –78    | EtMgBr (2.5)                               | Me <sub>3</sub> SiOTf (2.2) | –            | 3               |
| 10    | –78    | Me <sub>3</sub> SiOTf (2.2)                | EtMgBr (2.5)                | –            | 10              |
| 11    | –78    | EtMgBr (1.0)                               | Me <sub>3</sub> SiOTf (2.2) | EtMgBr (1.5) | 1               |
| 12    | –78    | <i>n</i> BuLi (1.0)                        | Me <sub>3</sub> SiOTf (2.2) | EtMgBr (1.5) | 41              |
| 13    | –78    | NaH (1.0)                                  | Me <sub>3</sub> SiOTf (2.2) | EtMgBr (1.5) | 42              |

7 <sup>a</sup>Reaction conditions: 0.1 M of **1a** in *t*BuOMe, overnight. The reaction was quenched with 1.0 M HCl aqueous solution and  
 8 extracted with CH<sub>2</sub>Cl<sub>2</sub>, conversion was determined by NMR of reaction crude. <sup>b</sup>Value in brackets corresponds to the  
 9 equivalents of the reagents used with respect to **1a**. <sup>c</sup>Product **2a** is formed (20%) with the complex mixture of side products.

10

11 **Supplementary Table 2.** Optimization data for the Cu-catalyzed asymmetric conjugate  
 12 addition of EtMgBr to **1a**<sup>a</sup>

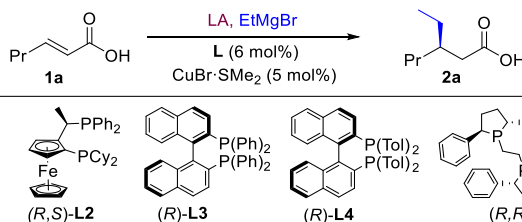

13

| Entry | Cu-L      | LA                    | T [°C] | Solvent                         | Conv. [%] <sup>b</sup> | <i>ee</i> [%] <sup>c</sup> |
|-------|-----------|-----------------------|--------|---------------------------------|------------------------|----------------------------|
| 1     | –         | –                     | 0      | CH <sub>2</sub> Cl <sub>2</sub> | 83 <sup>d</sup>        | –                          |
| 2     | <b>L1</b> | –                     | 0      | CH <sub>2</sub> Cl <sub>2</sub> | 79 <sup>d</sup>        | Rac                        |
| 3     | –         | –                     | –78    | CH <sub>2</sub> Cl <sub>2</sub> | 1                      | –                          |
| 4     | <b>L1</b> | –                     | –78    | CH <sub>2</sub> Cl <sub>2</sub> | 1                      | –                          |
| 5     | –         | Me <sub>3</sub> SiOTf | –78    | CH <sub>2</sub> Cl <sub>2</sub> | 55                     | –                          |

|    |           |                                    |     |                                 |                 |     |
|----|-----------|------------------------------------|-----|---------------------------------|-----------------|-----|
| 6  | <b>L1</b> | Me <sub>3</sub> SiOTf              | -78 | CH <sub>2</sub> Cl <sub>2</sub> | 74              | 47  |
| 7  | <b>L2</b> | Me <sub>3</sub> SiOTf              | -78 | CH <sub>2</sub> Cl <sub>2</sub> | 70              | 9   |
| 8  | <b>L3</b> | Me <sub>3</sub> SiOTf              | -78 | CH <sub>2</sub> Cl <sub>2</sub> | 72              | 47  |
| 9  | <b>L4</b> | Me <sub>3</sub> SiOTf              | -78 | CH <sub>2</sub> Cl <sub>2</sub> | 87              | 56  |
| 10 | <b>L5</b> | Me <sub>3</sub> SiOTf              | -78 | CH <sub>2</sub> Cl <sub>2</sub> | 75              | 47  |
| 11 | <b>L4</b> | Me <sub>3</sub> SiOTf              | -78 | THF                             | 100             | Rac |
| 12 | <b>L4</b> | Me <sub>3</sub> SiOTf              | -78 | Toluene                         | 62              | 80  |
| 13 | <b>L4</b> | Me <sub>3</sub> SiOTf              | -78 | Ether                           | 91              | 88  |
| 14 | <b>L4</b> | Me <sub>3</sub> SiOTf              | -78 | <i>t</i> BuOMe                  | 95              | 92  |
| 15 | <b>L4</b> | <i>t</i> BuMe <sub>2</sub> SiOTf   | -78 | <i>t</i> BuOMe                  | 95 <sup>e</sup> | 95  |
| 16 | <b>L4</b> | Me <sub>3</sub> SiBr               | -78 | <i>t</i> BuOMe                  | 12              | 89  |
| 17 | <b>L4</b> | Me <sub>3</sub> SiCl               | -78 | <i>t</i> BuOMe                  | 1               | –   |
| 18 | <b>L4</b> | BF <sub>3</sub> ·Et <sub>2</sub> O | -78 | <i>t</i> BuOMe                  | 19              | 92  |
| 19 | <b>L4</b> | BCl <sub>3</sub>                   | -78 | <i>t</i> BuOMe                  | 17              | 20  |
| 20 | <b>L4</b> | BBr <sub>3</sub>                   | -78 | <i>t</i> BuOMe                  | 16              | 13  |

1 <sup>a</sup>Reaction conditions: 0.1 M of **1a**, CuBr·SMe<sub>2</sub> (5 mol%), **L** (6 mol%), LA (3.0 equiv.), EtMgBr (3.0 equiv.). <sup>b</sup>The reaction  
2 was quenched with 1.0 M HCl aqueous solution and extracted with CH<sub>2</sub>Cl<sub>2</sub>. Conversion was determined by <sup>1</sup>H NMR of  
3 reaction crude. <sup>c</sup>Enantiomeric excess were determined by HPLC on a chiral stationary phase after transforming to the  
4 corresponding *N,N*-dimethyl amide. <sup>d</sup>Many byproducts formed. <sup>e</sup>Total conversion of the product and the *t*BuMe<sub>2</sub>Si-protected  
5 product

6

7 **Supplementary Table 3.** The reactivity of different metal carboxylates (formed by  
8 deprotonation of **1a** using different bases) towards various Me<sub>3</sub>SiX and BF<sub>3</sub>·Et<sub>2</sub>O in the  
9 presence of chiral copper catalyst Cu-**L4**<sup>a</sup>

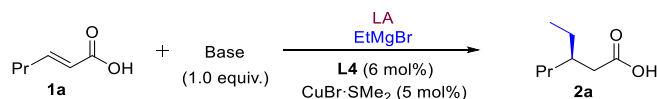

10

| Entry | Base          | LA                                 | LA [equiv.] | EtMgBr [equiv.] | T [°C] | Conv. [%] <sup>b</sup> | ee [%] <sup>c</sup> |
|-------|---------------|------------------------------------|-------------|-----------------|--------|------------------------|---------------------|
| 1     | EtMgBr        | Me <sub>3</sub> SiOTf              | 2.2         | 1.5             | -78    | 1                      | –                   |
| 2     | <i>n</i> BuLi | Me <sub>3</sub> SiOTf              | 2.2         | 1.5             | -78    | 99                     | 97                  |
| 3     | <i>n</i> BuLi | Me <sub>3</sub> SiOTf              | 1.2         | 1.5             | -78    | 99                     | 98                  |
| 4     | NaH           | Me <sub>3</sub> SiOTf              | 2.2         | 1.5             | -78    | 100                    | 95                  |
| 5     | <i>n</i> BuLi | Me <sub>3</sub> SiBr               | 1.2         | 2.5             | -78    | 60                     | 98                  |
| 6     | <i>n</i> BuLi | Me <sub>3</sub> SiBr               | 2.2         | 2.5             | -78    | 83                     | 99                  |
| 7     | <i>n</i> BuLi | Me <sub>3</sub> SiBr               | 3.0         | 2.5             | -78    | 90                     | 99                  |
| 8     | <i>n</i> BuLi | BF <sub>3</sub> ·Et <sub>2</sub> O | 3.0         | 2.5             | -78    | 77                     | 97                  |
| 9     | <i>n</i> BuLi | Me <sub>3</sub> SiCl               | 3.0         | 2.5             | -78    | 10                     | –                   |

11 <sup>a</sup>Reaction conditions: 0.1 M of **1a** in *t*BuOMe, CuBr·SMe<sub>2</sub> (5 mol%), **L4** (6 mol%), base (1.0 equiv.). <sup>b</sup>The reaction was  
12 quenched with 1.0 M HCl aqueous solution and extracted with CH<sub>2</sub>Cl<sub>2</sub>, conversion was determined by <sup>1</sup>H NMR of reaction  
13 crude. <sup>c</sup>Enantiomeric excess were determined by HPLC on a chiral stationary phase after transforming to the corresponding  
14 *N,N*-dimethyl amide.

15

1 **Supplementary Table 4.** Optimization of the equivalents of Me<sub>3</sub>SiOTf and EtMgBr, and  
 2 temperature<sup>a</sup>

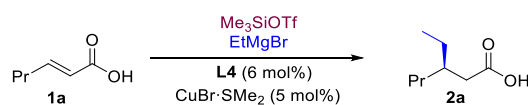

3

| Entry | Me <sub>3</sub> SiOTf [equiv.] | EtMgBr [equiv.] | T [°C] | Conv. [%] <sup>b</sup> | ee [%] <sup>c</sup> |
|-------|--------------------------------|-----------------|--------|------------------------|---------------------|
| 1     | 4.0                            | 4.0             | -78    | 94                     | 80                  |
| 2     | 3.0                            | 3.0             | -78    | 95                     | 92                  |
| 3     | 3.0                            | 2.2             | -78    | 83                     | 87                  |
| 4     | 2.5                            | 2.5             | -78    | 92                     | 97                  |
| 5     | 2.2                            | 3.0             | -78    | 94                     | 98                  |
| 6     | 2.2                            | 2.5             | -78    | 94                     | 98                  |
| 7     | 2.2                            | 2.2             | -78    | 91                     | 97                  |
| 8     | 1.5                            | 3.0             | -78    | 88                     | 98                  |
| 9     | 1.5                            | 2.2             | -78    | 86                     | 98                  |
| 10    | 1.5                            | 1.5             | -78    | 40                     | –                   |
| 11    | 2.2                            | 2.5             | 0      | 95                     | 88                  |
| 12    | 2.2                            | 2.5             | -20    | 97                     | 97                  |

4 <sup>a</sup>Reaction conditions: 0.1 M of **1a** in *t*BuOMe, CuBr·SMe<sub>2</sub> (5 mol%), **L1** (6 mol%). <sup>b</sup>The reaction was quenched with 1.0 M  
 5 HCl aqueous solution and extracted with CH<sub>2</sub>Cl<sub>2</sub>. Conversion was determined by <sup>1</sup>H NMR of reaction crude. <sup>c</sup>Enantiomeric  
 6 excess were determined by HPLC on a chiral stationary phase after transforming to the corresponding *N,N*-dimethyl amide.

7

8 **Supplementary Table 5.** Optimization data for the Cu-catalyzed asymmetric conjugate  
 9 addition of EtMgBr to **1e**<sup>a</sup>

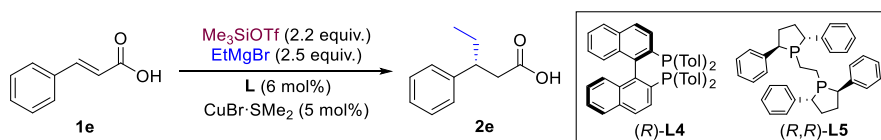

10

| Entry | L         | Cu-L [mol%] | T [°C] | Solvent [2 mL]                            | Conv. [%] <sup>b</sup> | ee [%] <sup>c</sup> |
|-------|-----------|-------------|--------|-------------------------------------------|------------------------|---------------------|
| 1     | <b>L4</b> | 5           | -20    | <i>t</i> BuOMe                            | 94                     | 57                  |
| 2     | <b>L4</b> | 5           | -78    | <i>t</i> BuOMe                            | 67                     | 87                  |
| 3     | <b>L5</b> | 5           | -78    | <i>t</i> BuOMe                            | 54                     | 89                  |
| 4     | <b>L5</b> | 5           | -78    | CH <sub>2</sub> Cl <sub>2</sub>           | 41                     | 72                  |
| 5     | <b>L5</b> | 5           | -78    | Toluene                                   | 45                     | 90                  |
| 6     | <b>L5</b> | 5           | -20    | <i>t</i> BuOMe                            | 96                     | 64                  |
| 7     | <b>L5</b> | 5           | -20    | <i>t</i> BuOMe                            | 65                     | 80 <sup>d</sup>     |
| 8     | <b>L5</b> | 10          | -20    | <i>t</i> BuOMe                            | 97                     | 80                  |
| 9     | <b>L5</b> | 10          | -40    | <i>t</i> BuOMe                            | 95                     | 86                  |
| 10    | <b>L5</b> | 10          | -40    | Toluene                                   | 89                     | 85                  |
| 11    | <b>L5</b> | 10          | -40    | <i>t</i> BuOMe:Toluene = 1:1 <sup>e</sup> | 98                     | 91                  |

11 <sup>a</sup>Reaction conditions: 0.1 M of **1e** in the solvent. <sup>b</sup>The reaction was quenched with 1.0 M HCl aqueous solution and extracted  
 12 with CH<sub>2</sub>Cl<sub>2</sub>, conversion was determined by <sup>1</sup>H NMR of reaction crude. <sup>c</sup>Enantiomeric excess were determined by HPLC on  
 13 a chiral stationary phase after transforming to the corresponding *N,N*-dimethyl amide. <sup>d</sup>EtMgBr was diluted with *t*BuOMe to

1 1.0 mL and slowly added with syringe pump in 1 h. <sup>c</sup>Catalyst **L5**/Cu(I) is not fully soluble in *t*BuOMe, but completely  
2 dissolved in toluene. Although the reaction outcome in *t*BuOMe and toluene is similar, *t*BuOMe is a still better solvent.

3

4 **Supplementary Table 6.** Practical aspects of the Cu-catalyzed asymmetric conjugate addition  
5 of EtMgBr to **1a**<sup>a</sup>

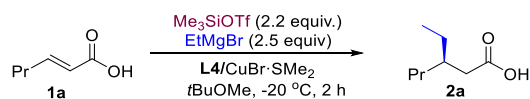

| Entry | <b>1a</b> [mmol] | <i>t</i> BuOMe [mL] | <b>L4</b> /Cu(I) [mol%] | Yield [%] <sup>b</sup> | <i>ee</i> [%] <sup>c</sup> |
|-------|------------------|---------------------|-------------------------|------------------------|----------------------------|
| 1     | 0.2              | 2                   | 1                       | 84                     | 94                         |
| 2     | 10               | 50                  | 5 <sup>d</sup>          | 83                     | 97                         |
| 3     | 0.2              | 2                   | 5 <sup>e</sup>          | 86                     | 95                         |

7 <sup>a</sup>Reaction conditions: -20 °C, Me<sub>3</sub>SiOTf (2.2 equiv.), EtMgBr (2.5 equiv.) for 2 h. <sup>b</sup>Isolated yields for **2a** are shown. Work-  
8 up was performed by acid base extraction. <sup>c</sup>Enantiomeric excess were determined by HPLC on a chiral stationary phase after  
9 transforming to the corresponding *N,N*-dimethyl amide. <sup>d</sup>83% catalyst can be recovered. <sup>e</sup>The reaction was performed with  
10 recovered catalyst.

11

12

# 1 **Supplementary methods**

## 2 **General experimental information**

3 All reactions using oxygen- and/or moisture-sensitive materials were carried out with anhydrous  
4 solvents under a nitrogen atmosphere using standard Schlenk techniques. Flash column  
5 chromatography was performed using Merck 60 Å 230-400 mesh silica gel. Thin layer  
6 chromatography was performed using 0.25 mm E. Merck silica plates (60F-254). Unless otherwise  
7 indicated, the saturated carboxylic acids were visualized by bromocresol green staining, and other  
8 products were visualized by UV and KMnO<sub>4</sub> staining. NMR data was collected on Varian VXR400  
9 (<sup>1</sup>H at 400.0 MHz; <sup>13</sup>C at 100.58 MHz) equipped with a 5 mm z-gradient broadband probe. Chemical  
10 shifts are reported in parts per million (ppm) relative to residual solvent peak (CDCl<sub>3</sub>, <sup>1</sup>H: 7.26 ppm;  
11 <sup>13</sup>C: 77.16 ppm; DMSO-*d*<sub>6</sub>, <sup>1</sup>H: 2.50 ppm; CD<sub>2</sub>Cl<sub>2</sub>, <sup>1</sup>H: 5.32 ppm;). Coupling constants are reported in  
12 Hertz. Multiplicity is reported with the usual abbreviations (s: singlet, d: doublet, dd: doublet of  
13 doublets, t: triplet, dt: doublet of triplets, q: quartet, dq: doublet of quartets, m: multiplet). Exact mass  
14 spectra were recorded on a LTQ Orbitrap XL apparatus with ESI ionization. Enantiomeric excess (*ee*)  
15 were determined by chiral HPLC analysis using a Shimadzu LC-10ADVP HPLC equipped with a  
16 Shimadzu SPD-M10AVP diode array detector.

## 17 **General Chemicals**

18 Unless otherwise indicated, reagents and substrates were purchased from commercial sources and used  
19 as received. Unsaturated carboxylic acids **1a-1i**, **1n** are commercially available, the rest were  
20 synthesized according to the literature procedures (see below). Solvents not required to be dry were  
21 purchased as technical grade and used as received. Dry DMF and THF used for decarboxylative cross-  
22 coupling reactions were purchased from Sigma-Aldrich, and the dry THF is inhibitor-free. Other dry  
23 solvents were freshly collected from a dry solvent purification system prior to use. Inert atmosphere  
24 experiments were performed with standard Schlenk techniques with dried (P<sub>2</sub>O<sub>5</sub>) nitrogen gas. Pent-4-  
25 en-1-ylMgBr (2.0 M in *t*BuOMe) was prepared from the corresponding alkyl bromides and Mg  
26 activated with I<sub>2</sub> in *t*BuOMe. Organolithium reagents and Grignard reagents were purchased from  
27 Sigma-Aldrich: *n*BuLi (2.5 M in hexane); EtMgBr, MeMgBr (3.0 M in Et<sub>2</sub>O); *i*BuMgBr, *i*PentMgBr,  
28 *n*HexMgBr, cyclopentylMgBr (2.0 M in Et<sub>2</sub>O). Chiral ligands (**L1-L5**) were purchased from Sigma-  
29 Aldrich and Solvias. All reported compounds were characterized by <sup>1</sup>H and <sup>13</sup>C NMR and compared  
30 with literature data. All new compounds were fully characterized by <sup>1</sup>H and <sup>13</sup>C NMR and HRMS  
31 techniques.

32

## 1 General determination of absolute configuration and enantiomeric excess of 2 asymmetric conjugate addition products

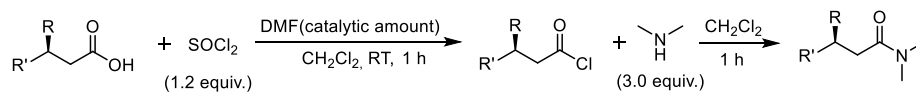

4 The absolute configuration of **2a-2c**, **2e-2i**, **2l**, **3a**, **3d-3h** was determined by comparing with reported  
5 data after transforming to the corresponding *N,N*-dimethyl amides.<sup>1</sup> The absolute configurations of  
6 other compounds were assigned by analogy. The *ee* of all the products was determined from the  
7 corresponding *N,N*-dimethyl amide derivatives.

## 8 General procedure for the synthesis of $\alpha,\beta$ -unsaturated carboxylic acids

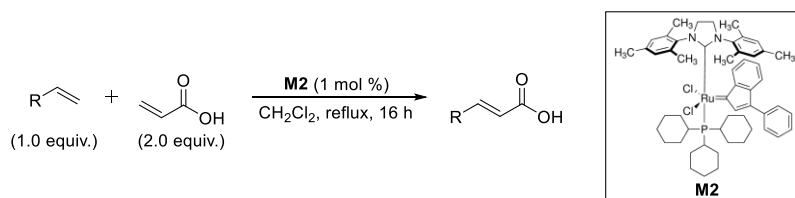

10 The reactions were performed according to the literature procedure.<sup>2</sup> The corresponding alkene (10.0  
11 mmol, 1.0 equiv.) and acrylic acid (20.0 mmol, 2.0 equiv.) were added simultaneously to a stirred  
12 solution of 1 mol% of **M2** catalyst in  $\text{CH}_2\text{Cl}_2$  (10.0 mL) at room temperature (RT). The reaction was  
13 refluxed under nitrogen for 16 h. The solvent and the remaining acrylic acid were removed under  
14 reduced pressure and the corresponding  $\alpha,\beta$ -unsaturated carboxylic acids was purified by column  
15 chromatography and rinsed with pentane.

### 16 (*E*)-4-Phenylbut-2-enoic acid (**1j**)<sup>3</sup>

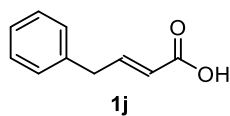

18 The crude product was purified by column chromatography on silica gel ( $\text{SiO}_2$ , pentane: $\text{Et}_2\text{O}$  = 4:1)  
19 and rinsed with pentane to afford product **1j** as a white solid [49% yield].

20 <sup>1</sup>H NMR ( $\text{CDCl}_3$ , 400 MHz):  $\delta$  7.35-7.29 (m, 2H,  $\text{CH}_{\text{Ar}}$ ), 7.28-7.15 (m, 4H,  $\text{CH}_{\text{Ar}}$ ,  $\text{CH}_2\text{CH}=\text{CH}$ ), 5.82  
21 (dt,  $J$  = 15.5, 1.7 Hz, 1H,  $\text{CH}_2\text{CH}=\text{CH}$ ), 3.55 (dd,  $J$  = 6.9, 1.6 Hz, 2H,  $\text{CH}_2$ ).

22 <sup>13</sup>C NMR ( $\text{CDCl}_3$ , 100 MHz):  $\delta$  172.2, 150.4, 137.4, 128.9, 128.8, 126.9, 121.8, 38.67.

23



1 **(E)-4-(4-Methoxyphenyl)but-2-enoic acid (1k)**<sup>2</sup>

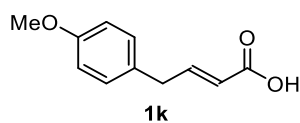

4 The crude product was purified by column chromatography on silica gel (SiO<sub>2</sub>, pentane:Et<sub>2</sub>O = 4:1)  
5 and rinsed with pentane to afford product **1k** as a white solid [45% yield].

6 <sup>1</sup>H NMR (CDCl<sub>3</sub>, 400 MHz): δ 7.19 (dt, *J* = 15.5, 6.7 Hz, 1H, CH<sub>2</sub>CH=CH), 7.11-7.06 (m, 2H, CH<sub>Ar</sub>),  
7 6.89-6.83 (m, 2H, CH<sub>Ar</sub>), 5.79 (dt, *J* = 15.5, 1.6 Hz, 1H, CH<sub>2</sub>CH=CH), 3.80 (s, 3H, CH<sub>3</sub>O), 3.49 (dd, *J*  
8 = 6.8, 1.6 Hz, 2H, CH<sub>2</sub>).

9 <sup>13</sup>C NMR (CDCl<sub>3</sub>, 100 MHz): δ 172.2, 158.6, 150.8, 129.9, 129.4, 121.5, 114.3, 55.4, 37.8.

10 **(E)-6-Bromohex-2-enoic acid (1l)**

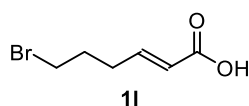

13 The crude product was purified by column chromatography on silica gel (SiO<sub>2</sub>, pentane:Et<sub>2</sub>O = 4:1)  
14 and rinsed with pentane to afford product **1l** as a white solid [46% yield].

15 <sup>1</sup>H NMR (CDCl<sub>3</sub>, 400 MHz): δ 7.04 (dt, *J* = 15.7, 7.0 Hz, 1H, CH<sub>2</sub>CH=CH), 5.89 (dt, *J* = 15.6, 1.6 Hz,  
16 1H, CH<sub>2</sub>CH=CH), 3.42 (t, *J* = 6.5 Hz, 2H, BrCH<sub>2</sub>), 2.42 (m, *J* = 7.2, 1.6 Hz, 2H, CH<sub>2</sub>CH=CH), 2.08-  
17 2.00 (m, 2H, BrCH<sub>2</sub>CH<sub>2</sub>).

18 <sup>13</sup>C NMR (CDCl<sub>3</sub>, 100 MHz): δ 172.1, 150.0, 122.0, 32.6, 30.7, 30.6.

19 HRMS (ESI, *m/z*): calcd. for C<sub>6</sub>H<sub>8</sub>BrO<sub>2</sub> [M-H]<sup>-</sup>: 190.97132, found: 190.97159.

20 **(E)-6-(Benzyloxy)hex-2-enoic acid (1m)**

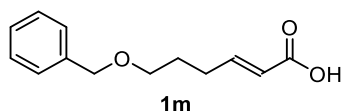

23 The crude product was purified by column chromatography on silica gel (SiO<sub>2</sub>, pentane:Et<sub>2</sub>O = 3:1)  
24 and rinsed with pentane to afford product **1m** as a white solid [39% yield].

25 <sup>1</sup>H NMR (CDCl<sub>3</sub>, 400 MHz): δ 7.38-7.24 (m, 5H, CH<sub>Ar</sub>), 7.09 (dt, *J* = 15.6, 7.0 Hz, 1H, CH<sub>2</sub>CH=CH),  
26 5.84 (dt, *J* = 15.6, 1.6 Hz, 1H, CH<sub>2</sub>CH=CH), 4.50 (s, 2H, PhCH<sub>2</sub>), 3.50 (t, *J* = 6.2 Hz, 2H, BnOCH<sub>2</sub>),  
27 2.38-2.30 (m, 2H, CH<sub>2</sub>CH=CH), 1.83-1.74 (m, 2H, BnOCH<sub>2</sub>CH<sub>2</sub>).

1  $^{13}\text{C}$  NMR ( $\text{CDCl}_3$ , 100 MHz):  $\delta$  172.0, 151.6, 138.4, 128.5, 127.8, 127.7, 121.2, 73.1, 69.3, 29.2, 28.1.

2 HRMS (ESI, m/Z): calcd. for  $\text{C}_{13}\text{H}_{15}\text{O}_3$   $[\text{M}-\text{H}]^-$ : 219.10267, found: 219.10319.

### 3 **General procedure for Cu-catalyzed asymmetric conjugate addition of** 4 **Grignard reagents to $\alpha,\beta$ -unsaturated carboxylic acids**

5 In a flame-dried Schlenk tube equipped with septum and magnetic stirring bar, the substrate (0.2  
6 mmol, 1.0 equiv.),  $\text{CuBr}\cdot\text{SMe}_2$  (0.01 mmol, 5 mol%), and ligand **L** (0.012 mmol, 6 mol%) were  
7 dissolved in the solvent (2.0 mL) and stirred under nitrogen atmosphere for 20 min. at RT. The  
8 mixture was cooled to  $-20$  or  $-40$  °C and  $\text{Me}_3\text{SiOTf}$  (0.44 mmol, 2.2 equiv.) was added. After 20  
9 min.,  $\text{RMgBr}$  (0.5 mmol, 2.5 equiv.) was added dropwise by hand in 10 min. (syringe pump use is also  
10 an option), and the reaction mixture was allowed to stir for 2 h. (Note:  $\text{Me}_3\text{SiOTf}$  should be a new  
11 bottle, and dry solvents should be freshly collected from a dry solvent purification system and used  
12 immediately. Syringe pump can be used to add Grignards in the big scale reaction, but the Grignards  
13 cannot be diluted by the solvent. Otherwise the conversion will decrease.)

#### 14 **General Work-up A**

15 The reaction was quenched with HCl aqueous solution (2.0 mL, 1.0 M) and warmed to RT. The  
16 mixture was extracted with  $\text{CH}_2\text{Cl}_2$  (10.0 mL  $\times$  3). The combined organic phase was dried over  
17  $\text{MgSO}_4$ , filtered and evaporated on rotary evaporator. Pentane (1.0 mL  $\times$  3) was added to the residue  
18 and the mixture was filtered with a small piece of cotton in glass pipette to remove most of the  
19 catalyst. The crude was purified by flash chromatography on silica gel.

#### 20 **General Work-up B**

21 The reaction was quenched with saturated  $\text{NaHCO}_3$  aqueous solution (2.0 mL), warmed to room  
22 temperature and the organic phase was extracted. The organic phase was further extracted with  
23 saturated  $\text{NaHCO}_3$  aqueous solution (2.0 mL) for another two times. The combined aqueous phase was  
24 acidified with HCl aqueous solution (1.5 mL, 12.0 M), and extracted with  $\text{CH}_2\text{Cl}_2$  (10.0 mL  $\times$  3). The  
25 combined organic phase was dried over  $\text{MgSO}_4$ , filtered and evaporated on rotary evaporator.

#### 26 **General Work-up C**

27 The reaction was quenched with saturated  $\text{NaHCO}_3$  aqueous solution (2.0 mL), warmed to room  
28 temperature and the organic phase was extracted. The organic phase was further extracted with  
29 saturated  $\text{Na}_2\text{CO}_3$  aqueous solution (2.0 mL) for another three times. The combined aqueous phase  
30 was acidified with HCl aqueous solution (3.0 mL, 12.0 M), and extracted with  $\text{CH}_2\text{Cl}_2$  (10.0 mL  $\times$  3).  
31 The combined organic phase was dried over  $\text{MgSO}_4$ , filtered and evaporated on rotary evaporator.

## 1 **General procedure for the synthesis of racemic conjugate addition products**

2 In a flame-dried Schlenk tube equipped with septum and magnetic stirring bar, the substrate (0.2  
3 mmol, 1.0 equiv.), CuBr·SMe<sub>2</sub> (0.01 mmol, 5 mol%) and THF (2.0 mL) were added. The mixture was  
4 cooled to -20 °C and Me<sub>3</sub>SiOTf (0.6 mmol, 3.0 equiv.) was added. After 20 min., RMgBr (0.6 mmol,  
5 3.0 equiv.) was added dropwise, and the reaction mixture was allowed to stir for 2 h. The reaction was  
6 quenched with HCl aqueous solution (2.0 mL, 1.0 M) and warmed to RT. The mixture was extracted  
7 with CH<sub>2</sub>Cl<sub>2</sub> (10.0 mL × 3). The combined organic phase was dried over MgSO<sub>4</sub>, filtered and  
8 evaporated on rotary evaporator. The crude was purified by flash column chromatography on silica  
9 gel.

## 10 **Procedure for the preparative scale (10 mmol) Cu-catalyzed asymmetric** 11 **conjugate addition of EtMgBr to 1a and the recovery of the chiral catalyst** 12 **L4/Cu**

13 In a flame-dried three-neck round-bottom flask equipped with septum and mechanistic stirring bar, the  
14 substrate **1a** (1.14g, 10.0 mmol, 1.0 equiv.), CuBr·SMe<sub>2</sub> (102.8 mg, 0.5 mmol, 5 mol%) and ligand  
15 (*R*)-**L4** (407.3 mg, 0.6 mmol, 6 mol%) were dissolved in *t*BuOMe (50 mL) and stirred under nitrogen  
16 atmosphere for 20 min. at RT. The mixture was cooled to -20 °C and Me<sub>3</sub>SiOTf (3.98 mL, 22 mmol,  
17 2.2 equiv.) was added. After 20 min., EtMgBr (8.33 mL, 25 mmol, 2.5 equiv.) was added with syringe  
18 pump in 20 min., and the reaction mixture was allowed to stir for 2 h. The reaction was quenched with  
19 water (10.0 mL) and warmed to RT. The aqueous phase was discarded and the organic phase was  
20 extracted with saturated NaHCO<sub>3</sub> aqueous solution (50.0 mL × 3). In this step, the chiral catalyst  
21 **L4/Cu(I)** is in the organic phase while the ACA product **2a** is in the aqueous phase. The organic phase  
22 was washed with HCl aqueous solution (10.0 mL, 1.0 M), dried over MgSO<sub>4</sub>, filtered and evaporated  
23 on rotary evaporator. The residue was rinsed with a little pentane and dried *in vacuo* for overnight to  
24 afford the recovered chiral catalyst **L4/Cu(I)** as a light yellow powder [83% yield]. The combined  
25 aqueous phase was acidified with HCl aqueous solution (50.0 mL, 12.0 M), and extracted with CH<sub>2</sub>Cl<sub>2</sub>  
26 (100.0 mL × 3). The combined organic phase was dried over MgSO<sub>4</sub>, filtered and evaporated on rotary  
27 evaporator to yield the product **2a** as a colorless oil [83% yield, 97% *ee*] (see Supplementary Table 4).

## 28 **Troubleshooting and frequently asked questions (FAQs):**

### 29 **Question 1:**

30 Why do I get sometimes lower conversion?

### 31 **Answer:**

1 This reaction is very sensitive to moisture. Therefore, it is recommended to use a new bottle  
2 of Me<sub>3</sub>SiOTf, and to collect dry solvents freshly from a dry solvent purification system  
3 immediately before use. Also make sure that at every step the reaction is protected under  
4 nitrogen and not in contact with the air, otherwise the conversion will decrease.

5 **Question 2:**

6 Why were the Grignard reagents added dropwise by hand in 10 min; can I use a syringe pump  
7 instead?

8 **Answer:**

9 Because of the non-catalyzed racemic reaction at high temperature (–20 or –40 °C), addition  
10 of Grignard reagent should be very slow to make sure that the catalytic reaction can  
11 outcompete the non-catalyzed racemic reaction, otherwise the *ee* will decrease. While for the  
12 large scale reaction (> 1 mmol), syringe pump use is an option, for the small scale reaction the  
13 amount of Grignard reagent is so little that it has to be diluted with solvent before adding with  
14 a syringe pump. However, we found that if the Grignard is diluted with the solvent, the  
15 conversion decreases dramatically (see Supplementary Table 5, entry 7). When the reaction is  
16 performed at –78 °C, addition of Grignard can be faster (added dropwise by hand in 1 min).

17 **Question 3:**

18 Why is the mixture of solvents *t*BuOMe:Toluene = 1:1 required for the aromatic substrates?

19 **Answer:**

20 Catalyst Cu-L1 is more suitable for aliphatic substrates (**2a-2d**, **2j-2m**, **3a**, **3d-3i**), while  
21 catalyst Cu-L2 is more suitable for aromatic substrates (**2e-2i**, **3b**, **3c**). As catalyst Cu-L1 is  
22 soluble in *t*BuOMe, good results can be obtained with *t*BuOMe. In contrast, catalyst Cu-L2 is  
23 less soluble in *t*BuOMe, well soluble in toluene. Although the reaction outcome in *t*BuOMe  
24 and toluene is similar, *t*BuOMe is still a better solvent (see Supplementary Table 5, entries 9,  
25 10). Therefore, adding toluene to *t*BuOMe can increase the solubility of Cu-L2 and give a  
26 better reaction outcome (see Supplementary Table 5, entry 11).

27

1 **Question 3:**

2 Why are there three different methods for reaction work-up, and how to select the best one?

3 **Answer:**

4 The 1,4-addition products can be divided into two groups: the polar products (**2a, 2b, 2d-2m,**  
5 **3a-3c**), and the less polar products that have a longer aliphatic chain (**2c, 3d-3i**). For the polar  
6 products, separation of the product from the chiral catalyst by column chromatography is  
7 difficult because of their similar polarity. However, we can use acid-base extraction to  
8 separate them (General Work-up B and C). After acid-base extraction, the products are almost  
9 pure, in some cases with small impurities or starting material present. If very pure products  
10 are needed, a further column chromatography can be used. To ensure sufficiently pure  
11 products, our rule of thumb is that when the conversion is lower than 97% or an obvious  
12 impurity is observed, we perform the column chromatography. Otherwise only acid-base  
13 extraction suffices to purify the polar products. In contrast, for less polar products the polarity  
14 of the product and chiral catalyst are more different. Therefore, column chromatography can  
15 be used directly to separate the product and chiral catalyst to obtain pure products (General  
16 Work-up A). In addition, because of the low polarity, acid-base extraction does not work well  
17 for less polar products.

18 **Question 4:**

19 Why is sometimes  $\text{NaHCO}_3$  solution and sometimes  $\text{Na}_2\text{CO}_3$  solution used for acid-base  
20 extraction? Can I use  $\text{NaOH}$  solution instead?

21 **Answer:**

22 Firstly the acid-base extraction only works for more polar products (**2a, 2b, 2d-2m, 3a-3c**).  
23 Again they can be divided into two groups: aliphatic substrates (**2a, 2b, 2d, 2j-2m, 3a**) and  
24 aromatic substrates (**2e-2i, 3b, 3c**). For aliphatic substrates, acid-base extraction with  
25 saturated  $\text{NaHCO}_3$  solution is enough to extract them. Using more alkaline  $\text{Na}_2\text{CO}_3$  solution  
26 or  $\text{NaOH}$  solution sometimes will extract more impurities. Aromatic substrates are more  
27 difficult to extract due to their higher solubility in toluene. Therefore, more alkaline  $\text{Na}_2\text{CO}_3$   
28 should be used to make sure that all the product will go to the aqueous phase. Using 1.0 M  
29  $\text{NaOH}$  solution is an option in both cases, but this can result in more impurities going the

1 aqueous phase. In addition, the NaOH solution will destroy part of the catalyst, so it can only  
2 be used when the catalyst does not need to be recovered.

3 **Question 5:**

4 Why was the reaction quenched with NaHCO<sub>3</sub> solution in General Work-up C, while the acid-  
5 base extraction was performed with Na<sub>2</sub>CO<sub>3</sub> solution?

6 **Answer:**

7 We found that when the reaction is quenched with Na<sub>2</sub>CO<sub>3</sub> solution, a lot of salt precipitates,  
8 making extraction more difficult. Therefore, less alkaline NaHCO<sub>3</sub> solution should be used to  
9 quench the reaction to avoid precipitation. For all the reactions, if the precipitate still appears  
10 when the reaction is quenched with NaHCO<sub>3</sub> solution (this is more likely to occur in big scale  
11 reactions), water can also be used to quench the reaction.

12 **Question 6:**

13 Why do I get high conversion but very low yield?

14 **Answer:**

15 There are two possibilities: (1) for some substrates, such as crotonic acid, a lot of byproducts  
16 will be formed at high temperature because of its high reactivity. In this case, decreasing the  
17 reaction temperature will be helpful; (2) the products can easily get stuck in the silica gel  
18 when purified by column chromatography. Therefore, a very short column and eluents with  
19 relatively high polarity are recommended.

20 **Question 7:**

21 How can I optimize the reaction if my reaction outcome is not good enough?

22 **Answer:**

23 Increasing the amount of catalyst will lead to an increase of both the conversion and *ee*.  
24 Increasing the temperature or the amount of Lewis acid will lead to an increase of the  
25 conversion but a decrease of the *ee* (and *vice versa*). Different combinations of these factors  
26 can be tried to optimize the reaction outcome.

## 1 Specific experimental details and product characterization

### 2 (*R*)-3-Ethylhexanoic acid (**2a**)<sup>4</sup>

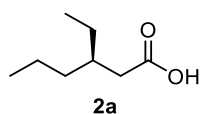

4 The reaction was performed with **1a** (22.8 mg, 0.2 mmol, 1.0 equiv.), CuBr·SMe<sub>2</sub> (2.06 mg, 0.01  
5 mmol, 5 mol%), ligand (*R*)-**L4** (8.15 mg, 0.012 mmol, 6 mol%), Me<sub>3</sub>SiOTf (80 μL, 0.44 mmol, 2.2  
6 equiv), EtMgBr (0.5 mmol, 3.0 M in Et<sub>2</sub>O, 2.5 equiv.), *t*BuOMe (2.0 mL) at -20 °C, and following  
7 General Work-up **B**. Product **2a** was obtained as a colorless oil without further purification [97%  
8 conversion, 91% yield, 97% *ee*].

9 <sup>1</sup>H NMR (CDCl<sub>3</sub>, 400 MHz): δ 2.28 (d, *J* = 6.9 Hz, 2H, CH<sub>2</sub>CO<sub>2</sub>H), 1.88-1.77 (m, 1H, CH), 1.45-1.22  
10 (m, 6H, CH<sub>2</sub>), 0.93-0.85 (m, 6H, CH<sub>3</sub>).

11 <sup>13</sup>C NMR (CDCl<sub>3</sub>, 100 MHz): δ 180.4, 38.7, 36.2, 35.8, 26.4, 19.8, 14.4, 10.9.

12 The *ee* of this compound was determined from the corresponding *N,N*-dimethyl amide derivative.  
13 HPLC: Chiracel-OBH, *n*heptane/*i*PrOH 98:2, 0.5 mL/min., 40 °C, detection at 206 nm. Retention time  
14 (min): 14.7 (minor) and 16.7 (major).

### 15 (*S*)-3-Methylpentanoic acid (**2b**)<sup>4</sup>

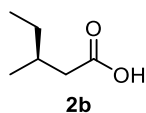

17 The reaction was performed with **1b** (17.2 mg, 0.2 mmol, 1.0 equiv.), CuBr·SMe<sub>2</sub> (2.06 mg, 0.01  
18 mmol, 5 mol%), ligand (*R*)-**L4** (8.15 mg, 0.012 mmol, 6 mol%), Me<sub>3</sub>SiOTf (80 μL, 0.44 mmol, 2.2  
19 equiv), EtMgBr (0.5 mmol, 3.0 M in Et<sub>2</sub>O, 2.5 equiv.), *t*BuOMe (2.0 mL) at -20 °C, and following  
20 General Work-up **B**. Product **2b** was obtained as a colorless oil after column chromatography (SiO<sub>2</sub>,  
21 pentane:Et<sub>2</sub>O = 5:1) [98% conversion, 74% yield, 95% *ee*].

22 <sup>1</sup>H NMR (CDCl<sub>3</sub>, 400 MHz): δ 2.36 (dd, *J* = 15.0, 6.0 Hz, 1H, CHHCO<sub>2</sub>H), 2.15 (dd, *J* = 15.0, 8.1 Hz,  
23 1H, CHHCO<sub>2</sub>H), 1.96-1.82 (m, 1H, CH), 1.46-1.33 (m, 1H, CH<sub>3</sub>CHH), 1.32-1.19 (m, 1H, CH<sub>3</sub>CHH),  
24 0.97 (d, *J* = 6.7 Hz, 3H, CH<sub>3</sub>CH), 0.90 (t, *J* = 7.4 Hz, 3H, CH<sub>3</sub>CH<sub>2</sub>).

25 <sup>13</sup>C NMR (CDCl<sub>3</sub>, 100 MHz): δ 180.1, 41.4, 31.9, 29.4, 19.4, 11.4.

1 The *ee* of this compound was determined from the corresponding *N,N*-dimethyl amide derivate.  
2 HPLC: Chiracel-OBH, *n*heptane/*i*PrOH 90:10, 0.5 mL/min., 40 °C, detection at 206 nm. Retention  
3 time (min): 10.7 (major) and 13.1 (minor).

4 **(*S*)-3-Cyclohexylpentanoic acid (2c)<sup>5</sup>**

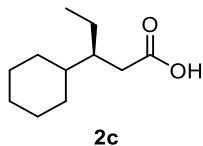

6 The reaction was performed with **1c** (30.8 mg, 0.2 mmol, 1.0 equiv.), CuBr·SMe<sub>2</sub> (2.06 mg, 0.01  
7 mmol, 5 mol%), ligand (*R*)-**L4** (8.15 mg, 0.012 mmol, 6 mol%), Me<sub>3</sub>SiOTf (80 μL, 0.44 mmol, 2.2  
8 equiv), EtMgBr (0.5 mmol, 3.0 M in Et<sub>2</sub>O, 2.5 equiv.), *t*BuOMe (2.0 mL) at -20 °C, and following  
9 General Work-up **A**. Product **2c** was obtained as a colorless oil after column chromatography (SiO<sub>2</sub>,  
10 pentane:Et<sub>2</sub>O = 15:1) [98% conversion, 83% yield, 98% *ee*].

11 <sup>1</sup>H NMR (CDCl<sub>3</sub>, 400 MHz): δ 2.36 (dd, *J* = 15.4, 6.0 Hz, 1H, CHHCO<sub>2</sub>H), 2.19 (dd, *J* = 15.4, 7.6 Hz,  
12 1H, CHHCO<sub>2</sub>H), 1.79-1.56 (m, 6H, CH<sub>2</sub>, CH), 1.49-0.93 (m, 8H, CH<sub>2</sub>), 0.89 (t, *J* = 7.4 Hz, 3H, CH<sub>3</sub>).

13 <sup>13</sup>C NMR (CDCl<sub>3</sub>, 100 MHz): δ 181.0, 42.0, 40.2, 36.1, 30.2, 29.3, 26.9, 26.9, 26.8, 24.0, 11.8.

14 The *ee* of this compound was determined from the corresponding *N,N*-dimethyl amide derivative.  
15 HPLC: Chiracel-OZH, *n*heptane/*i*PrOH 95:5, 0.5 mL/min., 40 °C, detection at 207 nm. Retention time  
16 (min): 17.0 (major) and 18.4 (minor).

17 **(*S*)-3-Cyclopropylpentanoic acid (2d)**

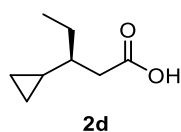

19 The reaction was performed with **1d** (22.4 mg, 0.2 mmol, 1.0 equiv.), CuBr·SMe<sub>2</sub> (2.06 mg, 0.01  
20 mmol, 5 mol%), ligand (*R*)-**L4** (8.15 mg, 0.012 mmol, 6 mol%), Me<sub>3</sub>SiOTf (80 μL, 0.44 mmol, 2.2  
21 equiv), EtMgBr (0.5 mmol, 3.0 M in Et<sub>2</sub>O, 2.5 equiv.), *t*BuOMe (2.0 mL) at -20 °C, and following  
22 General Work-up **B**. Product **2d** was obtained as a colorless oil without further purification [99%  
23 conversion, 83% yield, 93% *ee*].

24 <sup>1</sup>H NMR (CDCl<sub>3</sub>, 400 MHz): δ 2.42 (d, *J* = 7.0 Hz, 2H, CH<sub>2</sub>CO<sub>2</sub>H), 2.38 (dd, *J* = 14.5, 6.9 Hz, 1H,  
25 CHHCO<sub>2</sub>H), 1.55-1.46 (m, 2H, CH<sub>3</sub>CH<sub>2</sub>), 1.11-1.00 (m, 1H, CH<sub>3</sub>CH<sub>2</sub>CH), 0.96 (t, *J* = 7.5 Hz, 3H,  
26 CH<sub>3</sub>), 0.65-0.55 (m, 1H, CH<sub>Cy</sub>), 0.53-0.45 (m, 1H, CHH<sub>Cy</sub>), 0.45-0.38 (m, 1H, CHH<sub>Cy</sub>), 0.20-0.08 (m,  
27 2H, CH<sub>Cy2</sub>).



1  $^{13}\text{C}$  NMR ( $\text{CDCl}_3$ , 100 MHz):  $\delta$  180.3, 42.5, 39.8, 28.0, 15.9, 11.4, 4.7, 3.4.

2 HRMS (ESI,  $m/z$ ): calcd. for  $\text{C}_8\text{H}_{15}\text{O}_2$   $[\text{M}+\text{H}]^+$ : 143.10666, found: 143.10748.

3 The *ee* of this compound was determined from the corresponding *N,N*-dimethyl amide derivative.

4 HPLC: Chiracel-OBH, *n*heptane/*i*PrOH 98:2, 0.5 mL/min., 40 °C, detection at 207 nm. Retention time  
5 (min): 16.9 (minor) and 18.8 (major).

6

7

8

9 **(*R*)-3-Phenylpentanoic acid (2e)**<sup>6</sup>

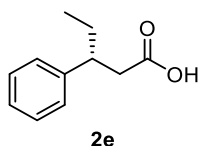

11 The reaction was performed with **1e** (29.6 mg, 0.2 mmol, 1.0 equiv.),  $\text{CuBr}\cdot\text{SMe}_2$  (4.12 mg, 0.02  
12 mmol, 10 mol%), ligand (*R,R*)-**L5** (12.16 mg, 0.024 mmol, 12 mol%),  $\text{Me}_3\text{SiOTf}$  (80  $\mu\text{L}$ , 0.44 mmol,  
13 2.2 equiv),  $\text{EtMgBr}$  (0.5 mmol, 3.0 M in  $\text{Et}_2\text{O}$ , 2.5 equiv.), *t*BuOMe (1.0 mL), Toluene (1.0 mL) at  
14  $-40$  °C, and following General Work-up C. Product **2e** was obtained as a colorless oil after column  
15 chromatography ( $\text{SiO}_2$ , pentane: $\text{Et}_2\text{O}$  = 5:1) [98% conversion, 74% yield, 91% *ee*].

16  $^1\text{H}$  NMR ( $\text{CDCl}_3$ , 400 MHz):  $\delta$  7.33-7.27 (m, 2H,  $\text{CH}_{\text{Ar}}$ ), 7.24-7.16 (m, 3H,  $\text{CH}_{\text{Ar}}$ ), 3.05-2.95 (m, 1H,  
17  $\text{CH}$ ), 2.68 (dd,  $J$  = 15.6, 7.1 Hz, 1H,  $\text{CHHCO}_2\text{H}$ ), 2.61 (dd,  $J$  = 15.6, 7.9 Hz, 1H,  $\text{CHHCO}_2\text{H}$ ), 1.80-  
18 1.68 (m, 1H,  $\text{CH}_3\text{CHH}$ ), 1.68-1.55 (m, 1H,  $\text{CH}_3\text{CHH}$ ), 0.80 (t,  $J$  = 7.4 Hz, 3H,  $\text{CH}_3$ ).

19  $^{13}\text{C}$  NMR ( $\text{CDCl}_3$ , 100 MHz):  $\delta$  178.8, 143.7, 128.6, 127.6, 126.6, 43.6, 41.2, 29.3, 12.0.

20 The *ee* of this compound was determined from the corresponding *N,N*-dimethyl amide derivative.

21 HPLC: Chiracel-ODH, *n*heptane/*i*PrOH 90:10, 0.5 mL/min., 40 °C, detection at 208 nm. Retention  
22 time (min): 12.1 (minor) and 13.2 (major).

23 **(*R*)-3-(4-Methoxyphenyl)pentanoic acid (2f)**

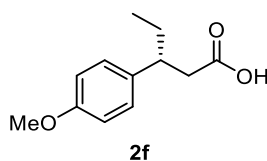

1 The reaction was performed with **1f** (35.6 mg, 0.2 mmol, 1.0 equiv.), CuBr·SMe<sub>2</sub> (4.12 mg, 0.02  
2 mmol, 10 mol%), ligand (*R,R*)-**L5** (12.16 mg, 0.024 mmol, 12 mol%), Me<sub>3</sub>SiOTf (80 μL, 0.44 mmol,  
3 2.2 equiv), EtMgBr (0.5 mmol, 3.0 M in Et<sub>2</sub>O, 2.5 equiv.), *t*BuOMe (1.0 mL), Toluene (1.0 mL) at  
4 -40 °C, and following General Work-up C. Product **2f** was obtained as a white solid after column  
5 chromatography (SiO<sub>2</sub>, pentane:Et<sub>2</sub>O = 5:1) [95% conversion, 70% yield, 91% *ee*].

6 <sup>1</sup>H NMR (CDCl<sub>3</sub>, 400 MHz): δ 7.13-7.07 (m, 2H, CH<sub>Ar</sub>), 6.87-6.81 (m, 2H, CH<sub>Ar</sub>), 3.79 (s, 3H,  
7 CH<sub>3</sub>O), 3.00-2.89 (m, 1H, CH), 2.64 (dd, *J* = 15.5, 7.0 Hz, 1H, CHHCO<sub>2</sub>H), 2.57 (dd, *J* = 15.5, 8.1  
8 Hz, 1H, CHHCO<sub>2</sub>H), 1.77-1.65 (m, 1H, CH<sub>3</sub>CHH), 1.64-1.50 (m, 1H, CH<sub>3</sub>CHH), 0.78 (t, *J* = 7.3 Hz,  
9 3H, CH<sub>3</sub>).

10 <sup>13</sup>C NMR (CDCl<sub>3</sub>, 100 MHz): δ 178.9, 158.3, 135.8, 128.5, 113.9, 55.3, 42.9, 41.5, 29.4, 12.0.

11 HRMS (ESI, *m/z*): calcd. for C<sub>12</sub>H<sub>17</sub>O<sub>3</sub> [M+H]<sup>+</sup>: 209.11722, found: 209.11821.

12 The *ee* of this compound was determined from the corresponding *N,N*-dimethyl amide derivate.  
13 HPLC: Chiracel-OJH, *n*heptane/*i*PrOH 90:10, 0.5 mL/min., 40 °C, detection at 204 nm. Retention  
14 time (min): 14.1 (minor) and 16.9 (major).

#### 15 (*R*)-3-(3-Bromophenyl)pentanoic acid (**2g**)

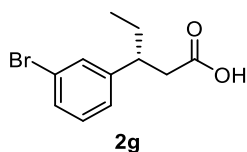

17 The reaction was performed with **1g** (45.4 mg, 0.2 mmol, 1.0 equiv.), CuBr·SMe<sub>2</sub> (4.12 mg, 0.02  
18 mmol, 10 mol%), ligand (*R,R*)-**L5** (12.16 mg, 0.024 mmol, 12 mol%), Me<sub>3</sub>SiOTf (80 μL, 0.44 mmol,  
19 2.2 equiv), EtMgBr (0.5 mmol, 3.0 M in Et<sub>2</sub>O, 2.5 equiv.), *t*BuOMe (1.0 mL), Toluene (1.0 mL) at  
20 -40 °C, and following General Work-up C. Product **2g** was obtained as a colorless oil after column  
21 chromatography (SiO<sub>2</sub>, pentane:Et<sub>2</sub>O = 5:1) [97% conversion, 54% yield, 86% *ee*].

22 <sup>1</sup>H NMR (CDCl<sub>3</sub>, 400 MHz): δ 7.37-7.31 (m, 2H, CH<sub>Ar</sub>), 7.20-7.08 (m, 2H, CH<sub>Ar</sub>), 2.96 (m, *J* = 7.4  
23 Hz, 1H, CH), 2.66 (dd, *J* = 15.8, 6.9 Hz, 1H, CHHCO<sub>2</sub>H), 2.58 (dd, *J* = 15.8, 8.0 Hz, 1H, CHHCO<sub>2</sub>H),  
24 1.79-1.66 (m, 1H, CH<sub>3</sub>CHH), 1.66-1.52 (m, 1H, CH<sub>3</sub>CHH), 0.79 (t, *J* = 7.3 Hz, 3H, CH<sub>3</sub>).

25 <sup>13</sup>C NMR (CDCl<sub>3</sub>, 100 MHz): δ 178.4, 146.2, 130.7, 130.2, 129.9, 126.4, 122.7, 43.4, 41.0, 29.2, 12.0.

26 HRMS (ESI, *m/z*): calcd. for C<sub>11</sub>H<sub>12</sub>BrO<sub>2</sub> [M-H]<sup>-</sup>: 255.00262, found: 255.00297.

27 The *ee* of this compound was determined from the corresponding *N,N*-dimethyl amide derivative.  
28 HPLC: Chiracel-ODH, *n*heptane/*i*PrOH 97:3, 0.5 mL/min., 40 °C, detection at 205 nm. Retention  
29 time (min): 22.2 (minor) and 25.9 (major).

1 **(R)-3-(Thiophen-2-yl)pentanoic acid (2h)**

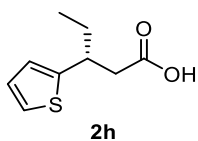

3 The reaction was performed with **1h** (30.8 mg, 0.2 mmol, 1.0 equiv.), CuBr·SMe<sub>2</sub> (4.12 mg, 0.02  
4 mmol, 10 mol%), ligand (*R,R*)-**L5** (12.16 mg, 0.024 mmol, 12 mol%), Me<sub>3</sub>SiOTf (80 μL, 0.44 mmol,  
5 2.2 equiv), EtMgBr (0.5 mmol, 3.0 M in Et<sub>2</sub>O, 2.5 equiv.), *t*BuOMe (1.0 mL), Toluene (1.0 mL) at  
6 -40 °C, and following General Work-up C. Product **2h** was obtained as a colorless oil after column  
7 chromatography (SiO<sub>2</sub>, pentane:Et<sub>2</sub>O = 5:1) [95% conversion, 75% yield, 90% *ee*].

8 <sup>1</sup>H NMR (CDCl<sub>3</sub>, 400 MHz): δ 7.16 (dd, *J* = 5.2, 1.2 Hz, 1H, CH<sub>Ar</sub>), 6.92 (dd, *J* = 5.1, 3.4 Hz, 1H,  
9 CH<sub>Ar</sub>), 6.86-6.82 (m, 1H, CH<sub>Ar</sub>), 3.40-3.31 (m, 1H, CH), 2.71 (dd, *J* = 15.7, 7.0 Hz, 1H, CHHCO<sub>2</sub>H),  
10 2.66 (dd, *J* = 15.7, 7.7 Hz, 1H, CHHCO<sub>2</sub>H), 1.85-1.72 (m, 1H, CH<sub>3</sub>CHH), 1.72-1.59 (m, 1H,  
11 CH<sub>3</sub>CHH), 0.88 (t, *J* = 7.3 Hz, 3H, CH<sub>3</sub>).

12 <sup>13</sup>C NMR (CDCl<sub>3</sub>, 100 MHz): δ 178.4, 147.5, 126.7, 124.2, 123.4, 42.1, 39.0, 30.3, 11.8.

13 HRMS (ESI, *m/z*): calcd. for C<sub>9</sub>H<sub>13</sub>O<sub>2</sub>S [M+H]<sup>+</sup>: 185.06308, found: 185.06390.

14 The *ee* of this compound was determined from the corresponding *N,N*-dimethyl amide derivative.  
15 HPLC: Chiracel-ADH, *n*heptane/*i*PrOH 90:10, 0.5 mL/min., 40 °C, detection at 240 nm. Retention  
16 time (min): 11.7 (minor) and 13.2 (major).

17 **(R)-3-(Thiophen-3-yl)pentanoic acid (2i)**

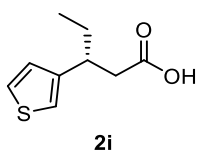

19 The reaction was performed with **1i** (30.8 mg, 0.2 mmol, 1.0 equiv.), CuBr·SMe<sub>2</sub> (4.12 mg, 0.02  
20 mmol, 10 mol%), ligand (*R,R*)-**L5** (12.16 mg, 0.024 mmol, 12 mol%), Me<sub>3</sub>SiOTf (80 μL, 0.44 mmol,  
21 2.2 equiv), EtMgBr (0.5 mmol, 3.0 M in Et<sub>2</sub>O, 2.5 equiv.), *t*BuOMe (1.0 mL), Toluene (1.0 mL) at  
22 -40 °C, and following General Work-up C. Product **2i** was obtained as a colorless oil without further  
23 purification [97% conversion, 88% yield, 93% *ee*].

24 <sup>1</sup>H NMR (CDCl<sub>3</sub>, 400 MHz): δ 7.26 (dd, *J* = 5.1, 2.9 Hz, 1H, CH<sub>Ar</sub>), 6.99 (dd, *J* = 3.0, 1.3 Hz, 1H,  
25 CH<sub>Ar</sub>), 6.95 (dd, *J* = 5.0, 1.3 Hz, 1H, CH<sub>Ar</sub>), 3.22-3.12 (m, 1H, CH), 2.66 (dd, *J* = 15.5, 7.0 Hz, 1H,  
26 CHHCO<sub>2</sub>H), 2.59 (dd, *J* = 15.5, 7.9 Hz, 1H, CHHCO<sub>2</sub>H), 1.72 (m, *J* = 15.1, 7.5, 5.6 Hz, 1H,  
27 CH<sub>3</sub>CHH), 1.68-1.54 (m, 1H, CH<sub>3</sub>CHH), 0.83 (t, *J* = 7.4 Hz, 3H, CH<sub>3</sub>).

1  $^{13}\text{C}$  NMR ( $\text{CDCl}_3$ , 100 MHz):  $\delta$  179.0, 144.5, 126.7, 125.7, 120.6, 41.0, 38.9, 29.0, 11.9.

2 HRMS (ESI,  $m/z$ ): calcd. for  $\text{C}_9\text{H}_{13}\text{O}_2\text{S}$   $[\text{M}+\text{H}]^+$ : 185.06308, found: 185.06383.

3 The *ee* of this compound was determined from the corresponding *N,N*-dimethyl amide derivative.

4 HPLC: Chiracel-OBH, *n*heptane/*i*PrOH 90:10, 0.5 mL/min., 40 °C, detection at 206 nm. Retention  
5 time (min): 14.3 (minor) and 17.4 (major).

6

7

8

9 **(*R*)-3-Benzylpentanoic acid (2j)**<sup>7</sup>

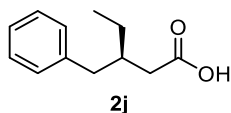

11 The reaction was performed with **1j** (32.4 mg, 0.2 mmol, 1.0 equiv.),  $\text{CuBr}\cdot\text{SMe}_2$  (2.06 mg, 0.01  
12 mmol, 5 mol%), ligand (*R*)-**L4** (8.15 mg, 0.012 mmol, 6 mol%),  $\text{Me}_3\text{SiOTf}$  (80  $\mu\text{L}$ , 0.44 mmol, 2.2  
13 equiv),  $\text{EtMgBr}$  (0.5 mmol, 3.0 M in  $\text{Et}_2\text{O}$ , 2.5 equiv.), *t*BuOMe (2.0 mL) at  $-40$  °C, and following  
14 General Work-up **B**. Product **2j** was obtained as a colorless oil after column chromatography ( $\text{SiO}_2$ ,  
15 pentane: $\text{Et}_2\text{O}$  = 10:1) [99% conversion, 70% yield, 97% *ee*].

16  $^1\text{H}$  NMR ( $\text{CDCl}_3$ , 400 MHz):  $\delta$  7.33-7.25 (m, 2H,  $\text{CH}_{\text{Ar}}$ ), 7.23-7.15 (m, 3H,  $\text{CH}_{\text{Ar}}$ ), 2.69 (dd,  $J$  = 13.6,  
17 6.8 Hz, 1H,  $\text{CHHCO}_2\text{H}$ ), 2.58 (dd,  $J$  = 13.6, 7.4 Hz, 1H,  $\text{CHHCO}_2\text{H}$ ), 2.31 (dd,  $J$  = 15.7, 7.2 Hz, 1H,  
18  $\text{PhCHH}$ ), 2.27 (dd,  $J$  = 15.7, 6.4 Hz, 1H,  $\text{PhCHH}$ ), 2.14 (m,  $J$  = 6.7 Hz, 1H,  $\text{CH}$ ), 1.49-1.31 (m, 2H,  
19  $\text{CH}_3\text{CH}_2$ ), 0.95 (t,  $J$  = 7.4 Hz, 3H,  $\text{CH}_3$ ).

20  $^{13}\text{C}$  NMR ( $\text{CDCl}_3$ , 100 MHz):  $\delta$  179.9, 140.3, 129.4, 128.4, 126.2, 40.0, 38.5, 37.9, 26.3, 11.1.

21 The *ee* of this compound was determined from the corresponding *N,N*-dimethyl amide derivative.

22 HPLC: Chiracel-ODH, *n*heptane/*i*PrOH 95:5, 0.5 mL/min., 40 °C, detection at 208 nm. Retention time  
23 (min): 16.6 (minor) and 22.2 (major).

24 **(*R*)-3-(4-Methoxybenzyl)pentanoic acid (2k)**

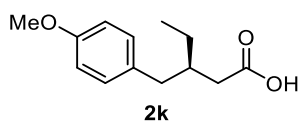

1 The reaction was performed with **1k** (192.2 mg, 1.0 mmol, 1.0 equiv.), CuBr·SMe<sub>2</sub> (10.3 mg, 0.05  
2 mmol, 5 mol%), ligand (*R*)-**L4** (40.7 mg, 0.06 mmol, 6 mol%), Me<sub>3</sub>SiOTf (398 μL, 2.2 mmol, 2.2  
3 equiv), *t*BuOMe (10.0 mL) at -40 °C, and EtMgBr (2.5 mmol, 3.0 M in Et<sub>2</sub>O, 2.5 equiv.) was added  
4 with syringe pump in 10 min. The reaction was quenched with saturated NaHCO<sub>3</sub> aqueous solution  
5 (10.0 mL), warmed to RT. and the organic phase was extracted. The organic phase was further  
6 extracted with saturated NaHCO<sub>3</sub> aqueous solution (10.0 mL × 3) for another two times. The  
7 combined aqueous phase was acidified with HCl aqueous solution (7.5 mL, 12.0 M), and extracted  
8 with CH<sub>2</sub>Cl<sub>2</sub> (30.0 mL × 3). The combined organic phase was dried over MgSO<sub>4</sub>, filtered and  
9 evaporated on rotary evaporator. Product **2k** was obtained as a colorless oil without further  
10 purification [98% conversion, 74% yield, 96% *ee*].

11 <sup>1</sup>H NMR (CDCl<sub>3</sub>, 400 MHz): δ 7.12-7.05 (m, 2H, CH<sub>Ar</sub>), 6.86-6.79 (m, 2H, CH<sub>Ar</sub>), 3.78 (s, 3H,  
12 CH<sub>3</sub>O), 2.63 (dd, *J* = 13.7, 6.8 Hz, 1H, CHHCO<sub>2</sub>H), 2.51 (dd, *J* = 13.8, 7.4 Hz, 1H, CHHCO<sub>2</sub>H), 2.27  
13 (d, *J* = 6.8 Hz, 2H, PhCH<sub>2</sub>), 2.08 (m, *J* = 6.7 Hz, 1H, CH), 1.48-1.29 (m, 2H, CH<sub>3</sub>CH<sub>2</sub>), 0.94 (t, *J* = 7.4  
14 Hz, 3H, CH<sub>3</sub>CH<sub>2</sub>).

15 <sup>13</sup>C NMR (CDCl<sub>3</sub>, 100 MHz): δ 180.2, 158.1, 132.3, 130.3, 113.8, 55.3, 39.0, 38.7, 37.9, 26.2, 11.1.

16 HRMS (ESI, *m/z*): calcd. for C<sub>13</sub>H<sub>17</sub>O<sub>3</sub> [M-H]<sup>-</sup>: 221.11832, found: 221.11842.

17 The *ee* of this compound was determined from the corresponding *N,N*-dimethyl amide derivative.  
18 HPLC: Chiracel-OZH, *n*heptane/*i*PrOH 95:5, 0.5 mL/min., 40 °C, detection at 204 nm. Retention time  
19 (min): 35.2 (minor) and 39.9 (major).

## 20 (*R*)-6-Bromo-3-ethylhexanoic acid (**2l**)

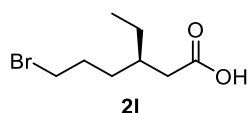

22 The reaction was performed with **1l** (38.6 mg, 0.2 mmol, 1.0 equiv.), CuBr·SMe<sub>2</sub> (2.06 mg, 0.01  
23 mmol, 5 mol%), ligand (*R*)-**L4** (8.15 mg, 0.012 mmol, 6 mol%), Me<sub>3</sub>SiOTf (80 μL, 0.44 mmol, 2.2  
24 equiv), EtMgBr (0.5 mmol, 3.0 M in Et<sub>2</sub>O, 2.5 equiv.), *t*BuOMe (2.0 mL) at -20 °C, and following  
25 General Work-up **B**. Product **2l** was obtained as a colorless without further purification [97%  
26 conversion, 88% yield, 96% *ee*].

27 <sup>1</sup>H NMR (CDCl<sub>3</sub>, 400 MHz): δ 3.40 (t, *J* = 6.8 Hz, 2H, BrCH<sub>2</sub>), 2.33 (dd, *J* = 15.3, 6.8 Hz, 1H,  
28 CHHCO<sub>2</sub>H), 2.27 (dd, *J* = 13.8, 6.9 Hz, 1H, CHHCO<sub>2</sub>H), 1.92-1.79 (m, 3H, BrCH<sub>2</sub>CH<sub>2</sub>, CH), 1.56-  
29 1.30 (m, 4H, BrCH<sub>2</sub>CH<sub>2</sub>CH<sub>2</sub>, CH<sub>3</sub>CH<sub>2</sub>), 0.90 (t, *J* = 7.4 Hz, 3H, CH<sub>3</sub>).

30 <sup>13</sup>C NMR (CDCl<sub>3</sub>, 100 MHz): δ 179.9, 38.5, 35.8, 33.9, 32.0, 30.1, 26.3, 10.8.

1 HRMS was measured after transforming to the corresponding *N,N*-dimethyl amide (ESI, *m/z*): calcd.  
2 for C<sub>10</sub>H<sub>21</sub>NOBr [M+H]<sup>+</sup>: 250.08010, found: 250.08049.

3 The *ee* of this compound was determined from the corresponding *N,N*-dimethyl amide derivat.  
4 HPLC: Chiracel-ODH, *n*heptane/*i*PrOH 95:5, 0.5 mL/min., 40 °C, detection at 208 nm. Retention time  
5 (min): 15.6 (major) and 17.2 (minor).

6 **(*R*)-6-Benzyloxy-3-ethylhexanoic acid (2m)**

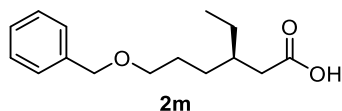

8 The reaction was performed with **1m** (44.1 mg, 0.2 mmol, 1.0 equiv.), CuBr·SMe<sub>2</sub> (2.06 mg, 0.01  
9 mmol, 5 mol%), ligand (*R*)-**L4** (8.15 mg, 0.012 mmol, 6 mol%), Me<sub>3</sub>SiOTf (80 μL, 0.44 mmol, 2.2  
10 equiv), EtMgBr (0.5 mmol, 3.0 M in Et<sub>2</sub>O, 2.5 equiv.), *t*BuOMe (2.0 mL) at -20 °C, and following  
11 General Work-up **B**. Product **2m** was obtained as a colorless oil without further purification [97%  
12 conversion, 75% yield, 97% *ee*].

13 <sup>1</sup>H NMR (CDCl<sub>3</sub>, 400 MHz): δ 7.38-7.25 (m, 5H, CH<sub>Ar</sub>), 4.51 (s, 2H, PhCH<sub>2</sub>), 3.47 (t, *J* = 6.6 Hz, 2H,  
14 BnOCH<sub>2</sub>), 2.31 (dd, *J* = 15.5, 7.0 Hz, 1H, CHHCO<sub>2</sub>H), 2.27 (dd, *J* = 15.5, 6.7 Hz, 1H, CHHCO<sub>2</sub>H),  
15 1.84 (m, *J* = 6.5 Hz, 1H, CH), 1.69-1.58 (m, 2H, BnOCH<sub>2</sub>CH<sub>2</sub>), 1.50-1.30 (m, 4H, BnOCH<sub>2</sub>CH<sub>2</sub>CH<sub>2</sub>,  
16 CH<sub>3</sub>CH<sub>2</sub>), 0.89 (t, *J* = 7.4 Hz, 3H, CH<sub>3</sub>).

17 <sup>13</sup>C NMR (CDCl<sub>3</sub>, 100 MHz): δ 179.8, 138.6, 128.5, 127.8, 127.6, 73.0, 70.6, 38.6, 36.2, 29.9, 26.9,  
18 26.3, 10.9.

19 HRMS (ESI, *m/z*): calcd. for C<sub>15</sub>H<sub>21</sub>O<sub>3</sub> [M-H]<sup>-</sup>: 249.14962, found: 249.14996.

20 The *ee* of this compound was determined from the corresponding *N,N*-dimethyl amide derivative.  
21 HPLC: Chiracel-ASH, *n*heptane/*i*PrOH 98:2, 0.5 mL/min., 40 °C, detection at 207 nm. Retention time  
22 (min): 21.9 (minor) and 23.9 (major).

23 **(*R*)-3-Methylhexanoic acid (3a)**<sup>8</sup>

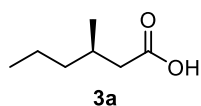

25 The reaction was performed with **1a** (22.8 mg, 0.2 mmol, 1.0 equiv.), CuBr·SMe<sub>2</sub> (4.12 mg, 0.02  
26 mmol, 10 mol%), ligand (*R*)-**L4** (16.30 mg, 0.024 mmol, 12 mol%), Me<sub>3</sub>SiOTf (109 μL, 0.6 mmol, 3.0  
27 equiv), MeMgBr (0.6 mmol, 3.0 M in Et<sub>2</sub>O, 3.0 equiv.), *t*BuOMe (2.0 mL) at -20 °C, and following

1 General Work-up **B**. Product **3a** was obtained as a colorless oil without further purification [97%  
2 conversion, 93% yield, 96% *ee*].

3 <sup>1</sup>H NMR (CDCl<sub>3</sub>, 400 MHz): δ 2.35 (dd, *J* = 14.9, 5.9 Hz, 1H, CHHCO<sub>2</sub>H), 2.14 (dd, *J* = 14.9, 8.2 Hz,  
4 1H, CHHCO<sub>2</sub>H), 2.04-1.91 (m, 1H, CH), 1.42-1.14 (m, 4H, CH<sub>3</sub>CH<sub>2</sub>CH<sub>2</sub>, CH<sub>3</sub>CH<sub>2</sub>CH<sub>2</sub>), 0.96 (d, *J* =  
5 6.6 Hz, 3H, CH<sub>3</sub>CH), 0.90 (t, *J* = 7.1 Hz, 3H, CH<sub>3</sub>CH<sub>2</sub>).

6 <sup>13</sup>C NMR (CDCl<sub>3</sub>, 100 MHz): δ 180.0, 41.8, 39.1, 30.0, 20.1, 19.8, 14.3.

7 The *ee* of this compound was determined from the corresponding *N,N*-dimethyl amide derivative.  
8 HPLC: Chiracel-OBH, *n*heptane/*i*PrOH 90:10, 0.5 mL/min., 40 °C, detection at 209 nm. Retention  
9 time (min): 9.0 (minor) and 10.1 (major).

10

11

12 **(*R*)-3-Phenylbutanoic acid (3b)**<sup>9</sup>

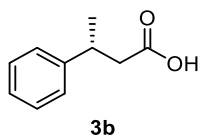

14 The reaction was performed with **1e** (148.2 mg, 1.0 mmol, 1.0 equiv.), CuBr·SMe<sub>2</sub> (20.56 mg, 0.1  
15 mmol, 10 mol%), ligand (*R,R*)-**L5** (60.79 mg, 0.12 mmol, 12 mol%), Me<sub>3</sub>SiOTf (544 μL, 0.6 mmol,  
16 3.0 equiv), *t*BuOMe (5.0 mL), Toluene (5.0 mL) at -20 °C, and MeMgBr (3.0 mmol, 3.0 M in Et<sub>2</sub>O,  
17 3.0 equiv.) was added with syringe pump in 10 min. The reaction was quenched with saturated  
18 NaHCO<sub>3</sub> aqueous solution (10.0 mL), warmed to room temperature and the organic phase was  
19 extracted. The organic phase was further extracted with saturated Na<sub>2</sub>CO<sub>3</sub> aqueous solution (10.0 mL)  
20 for another three times. The combined aqueous phase was acidified with HCl aqueous solution (15.0  
21 mL, 12.0 M), and extracted with CH<sub>2</sub>Cl<sub>2</sub> (30.0 mL × 3). The combined organic phase was dried over  
22 MgSO<sub>4</sub>, filtered and evaporated on rotary evaporator. Product **3b** was obtained as a colorless oil  
23 without further purification [97% conversion, 90% yield, 99% *ee*].

24 <sup>1</sup>H NMR (CDCl<sub>3</sub>, 400 MHz): δ 7.35-7.29 (m, 2H, CH<sub>Ar</sub>), 7.26-7.18 (m, 3H, CH<sub>Ar</sub>), 3.29 (m, *J* = 7.1  
25 Hz, 1H, CH), 2.69 (dd, *J* = 15.5, 6.8 Hz, 1H, CHHCO<sub>2</sub>H), 2.59 (dd, *J* = 15.5, 8.3 Hz, 1H, CHHCO<sub>2</sub>H),  
26 1.33 (d, *J* = 6.9 Hz, 3H, CH<sub>3</sub>).

27 <sup>13</sup>C NMR (CDCl<sub>3</sub>, 100 MHz): δ 179.2, 145.6, 128.7, 126.8, 126.6, 42.7, 36.2, 22.0.

1 The *ee* of this compound was determined from the corresponding *N,N*-dimethyl amide derivative.  
2 HPLC: Chiracel-ODH, *n*heptane/*i*PrOH 90:10, 0.5 mL/min., 40 °C, detection at 208 nm. Retention  
3 time (min): 19.7 (minor) and 22.1 (major).

4 **(*R*)-3-(4-Methylphenyl)butanoic acid (3c)**<sup>10</sup>

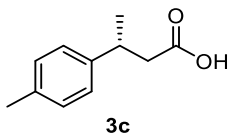

6 The reaction was performed with **1n** (32.4 mg, 0.2 mmol, 1.0 equiv.), CuBr·SMe<sub>2</sub> (4.12 mg, 0.02  
7 mmol, 10 mol%), ligand (*R,R*)-**L5** (12.16 mg, 0.024 mmol, 12 mol%), Me<sub>3</sub>SiOTf (109 μL, 0.6 mmol,  
8 3.0 equiv), MeMgBr (0.6 mmol, 3.0 M in Et<sub>2</sub>O, 3.0 equiv.), *t*BuOMe (1.0 mL), Toluene (1.0 mL) at  
9 -20 °C, and following General Work-up C. Product **3c** was obtained as a colorless oil after column  
10 chromatography (SiO<sub>2</sub>, pentane:Et<sub>2</sub>O = 5:1) [91% conversion, 74% yield, 99% *ee*].

11 <sup>1</sup>H NMR (CDCl<sub>3</sub>, 400 MHz): δ 7.13 (s, 4H, CH<sub>Ar</sub>), 3.26 (m, *J* = 7.1 Hz, 1H, CH), 2.67 (dd, *J* = 15.5,  
12 6.8 Hz, 1H, CHHCO<sub>2</sub>H), 2.57 (dd, *J* = 15.5, 8.2 Hz, 1H, CHHCO<sub>2</sub>H), 2.34 (s, 3H, ArCH<sub>3</sub>), 1.32 (d, *J*  
13 = 7.0 Hz, 3H, CHCH<sub>3</sub>).

14 <sup>13</sup>C NMR (CDCl<sub>3</sub>, 100 MHz): δ 178.9, 142.6, 163.1, 129.4, 126.7, 42.8, 35.9, 22.1, 21.1.

15 The *ee* of this compound was determined from the corresponding *N,N*-dimethyl amide derivative.  
16 HPLC: Chiracel-ODH, *n*heptane/*i*PrOH 95:5, 0.5 mL/min., 40 °C, detection at 207 nm. Retention time  
17 (min): 15.3 (minor) and 17.7 (major).

18 **(*R*)-3-Cyclopentylhexanoic acid (3d)**

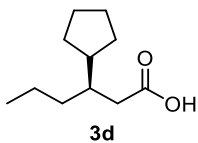

20 The reaction was performed with **1a** (22.8 mg, 0.2 mmol, 1.0 equiv.), CuBr·SMe<sub>2</sub> (4.12 mg, 0.02  
21 mmol, 10 mol%), ligand (*R*)-**L4** (16.30 mg, 0.024 mmol, 12 mol%), Me<sub>3</sub>SiOTf (80 μL, 0.44 mmol, 2.2  
22 equiv), cyclopentylMgBr (0.5 mmol, 2.0 M in Et<sub>2</sub>O, 2.5 equiv.), *t*BuOMe (2.0 mL) at -20 °C, and  
23 following General Work-up A. Product **3d** was obtained as a colorless oil after column  
24 chromatography (SiO<sub>2</sub>, pentane:Et<sub>2</sub>O = 15:1) [91% conversion, 79% yield, 96% *ee*].

25 <sup>1</sup>H NMR (CDCl<sub>3</sub>, 400 MHz): δ 2.37 (dd, *J* = 15.2, 4.6 Hz, 1H, CHHCO<sub>2</sub>H), 2.28 (dd, *J* = 15.3, 6.5 Hz,  
26 1H, CHHCO<sub>2</sub>H), 1.86-1.68 (m, 4H, CH, CH<sub>2</sub>), 1.67-1.45 (m, 4H, CH<sub>2</sub>), 1.45-1.22 (m, 4H, CH<sub>2</sub>), 1.21-  
27 1.06 (m, 2H, CH<sub>2</sub>), 0.89 (t, *J* = 6.4 Hz, 3H, CH<sub>3</sub>).



1  $^{13}\text{C}$  NMR ( $\text{CDCl}_3$ , 100 MHz):  $\delta$  180.7, 44.1, 39.8, 37.6, 35.1, 30.5, 30.3, 25.5, 25.4, 19.7, 14.6.

2 HRMS (ESI,  $m/z$ ): calcd. for  $\text{C}_{11}\text{H}_{19}\text{O}_2$   $[\text{M}-\text{H}]^-$ : 183.13905, found: 183.13919.

3 The *ee* of this compound was determined from the corresponding *N,N*-dimethyl amide derivative.

4 HPLC: Chiracel-OZH, *n*heptane/*i*PrOH 98:2, 0.5 mL/min., 40 °C, detection at 206 nm. Retention time  
5 (min): 30.1 (minor) and 32.3 (major).

6 **(*S*)-5-Methyl-3-propylhexanoic acid (3e)**

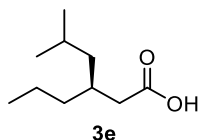

8 The reaction was performed with **1a** (22.8 mg, 0.2 mmol, 1.0 equiv.),  $\text{CuBr}\cdot\text{SMe}_2$  (2.06 mg, 0.01  
9 mmol, 5 mol%), ligand (*R*)-**L4** (8.15 mg, 0.012 mmol, 6 mol%),  $\text{Me}_3\text{SiOTf}$  (80  $\mu\text{L}$ , 0.44 mmol, 2.2  
10 equiv), *t*BuMgBr (0.5 mmol, 2.0 M in  $\text{Et}_2\text{O}$ , 2.5 equiv.), *t*BuOMe (2.0 mL) at  $-20$  °C, and following  
11 General Work-up A. Product **3e** was obtained as a colorless oil after column chromatography ( $\text{SiO}_2$ ,  
12 pentane: $\text{Et}_2\text{O}$  = 15:1) [95% conversion, 83% yield, 95% *ee*].

13  $^1\text{H}$  NMR ( $\text{CDCl}_3$ , 400 MHz):  $\delta$  2.26 (d,  $J$  = 6.7 Hz, 2H,  $\text{CH}_2\text{CO}_2\text{H}$ ), 2.00-1.88 (m, 1H,  
14  $\text{CH}_3\text{CH}_2\text{CH}_2\text{CH}$ ), 1.71-1.56 (m, 1H,  $\text{CH}_3\text{CH}$ ), 1.37-1.23 (m, 4H,  $\text{CH}_3\text{CH}_2$ ,  $\text{CH}_3\text{CH}_2\text{CH}_2$ ), 1.24-1.07  
15 (m, 2H,  $\text{CH}_3\text{CHCH}_2$ ), 0.93-0.83 (m, 9H,  $\text{CH}_3$ ).

16  $^{13}\text{C}$  NMR ( $\text{CDCl}_3$ , 100 MHz):  $\delta$  180.4, 43.8, 39.4, 36.6, 32.6, 25.4, 22.9, 22.8, 19.6, 14.4.

17 HRMS (ESI,  $m/z$ ): calcd. for  $\text{C}_{10}\text{H}_{19}\text{O}_2$   $[\text{M}-\text{H}]^-$ : 171.13905, found: 171.13925.

18 The *ee* of this compound was determined from the corresponding *N,N*-dimethyl amide derivative.

19 HPLC: Chiracel-ADH, *n*heptane/*i*PrOH 95.5:0.5, 0.5 mL/min., 40 °C, detection at 215 nm. Retention  
20 time (min): 44.2 (major) and 47.9 (minor).

21 **(*S*)-6-Methyl-3-propylheptanoic acid (3f)**

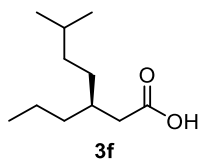

23 The reaction was performed with **1a** (22.8 mg, 0.2 mmol, 1.0 equiv.),  $\text{CuBr}\cdot\text{SMe}_2$  (2.06 mg, 0.01  
24 mmol, 5 mol%), ligand (*R*)-**L4** (8.15 mg, 0.012 mmol, 6 mol%),  $\text{Me}_3\text{SiOTf}$  (80  $\mu\text{L}$ , 0.44 mmol, 2.2  
25 equiv), *i*PentMgBr (0.5 mmol, 2.0 M in  $\text{Et}_2\text{O}$ , 2.5 equiv.), *t*BuOMe (2.0 mL) at  $-20$  °C, and following

1 General Work-up A. Product **3f** was obtained as a colorless oil after column chromatography (SiO<sub>2</sub>,  
2 pentane:Et<sub>2</sub>O = 15:1) [98% conversion, 84% yield, 98% *ee*].

3 <sup>1</sup>H NMR (CDCl<sub>3</sub>, 400 MHz): δ 2.28 (d, *J* = 6.8 Hz, 2H, CH<sub>2</sub>CO<sub>2</sub>H), 1.86 (m, *J* = 6.3 Hz, 1H,  
4 CH<sub>3</sub>CH<sub>2</sub>CH<sub>2</sub>CH), 1.56-1.44 (m, 1H, CH<sub>3</sub>CH), 1.40-1.21 (m, 6H, CH<sub>2</sub>), 1.21-1.12 (m, 2H,  
5 CH<sub>3</sub>CHCH<sub>2</sub>), 0.94-0.82 (m, 9H, CH<sub>3</sub>).

6 <sup>13</sup>C NMR (CDCl<sub>3</sub>, 100 MHz): δ 180.4, 39.2, 36.3, 35.8, 35.0, 31.6, 28.4, 22.8, 22.7, 19.8, 14.4.

7 HRMS (ESI, *m/z*): calcd. for C<sub>11</sub>H<sub>21</sub>O<sub>2</sub> [M-H]<sup>-</sup>: 185.15470, found: 185.15487.

8 The *ee* of this compound was determined from the corresponding *N,N*-dimethyl amide derivative.  
9 HPLC: Chiracel-ODH, *n*heptane/*i*PrOH 98:2, 0.5 mL/min., 40 °C, detection at 208 nm. Retention time  
10 (min): 12.9 (major) and 13.7 (minor).

11

## 12 (S)-3-Propyl-oct-7-enoic acid (**3g**)

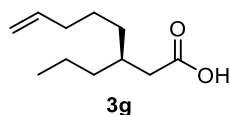

14 The reaction was performed with **1a** (22.8 mg, 0.2 mmol, 1.0 equiv.), CuBr·SMe<sub>2</sub> (2.06 mg, 0.01  
15 mmol, 5 mol%), ligand (*R*)-**L4** (8.15 mg, 0.012 mmol, 6 mol%), Me<sub>3</sub>SiOTf (80 μL, 0.44 mmol, 2.2  
16 equiv), pent-4-en-1-ylMgBr (0.5 mmol, 2.0 M in *t*BuOMe, 2.5 equiv.), *t*BuOMe (2.0 mL) at -20 °C,  
17 and following General Work-up A. Product **3g** was obtained as a colorless oil after column  
18 chromatography (SiO<sub>2</sub>, pentane:Et<sub>2</sub>O = 15:1) [94% conversion, 85% yield, 98% *ee*].

19 <sup>1</sup>H NMR (CDCl<sub>3</sub>, 400 MHz): δ 5.86-5.74 (m, 1H, CH<sub>2</sub>=CH), 5.00 (m, *J* = 17.1, 1.7 Hz, 1H,  
20 CHH=CH), 4.96-4.92 (m, 1H, CHH=CH), 2.28 (d, *J* = 6.8 Hz, 2H, CH<sub>2</sub>CO<sub>2</sub>H), 2.08-2.00 (m, 2H,  
21 CH<sub>2</sub>=CHCH<sub>2</sub>), 1.94-1.83 (m, 1H, CH<sub>3</sub>CH<sub>2</sub>CH<sub>2</sub>CH), 1.45-1.20 (m, 8H, CH<sub>2</sub>), 0.95-0.82 (m, 3H, CH<sub>3</sub>).

22 <sup>13</sup>C NMR (CDCl<sub>3</sub>, 100 MHz): δ 180.3, 138.9, 114.6, 39.1, 36.2, 34.7, 34.1, 33.4, 26.0, 19.8, 14.4.

23 HRMS (ESI, *m/z*): calcd. for C<sub>11</sub>H<sub>19</sub>O<sub>2</sub> [M-H]<sup>-</sup>: 183.13905, found: 183.13927.

24 The *ee* of this compound was determined from the corresponding *N,N*-dimethyl amide derivative.  
25 HPLC: Chiracel-OBH, *n*heptane/*i*PrOH 99.7:0.3, 0.5 mL/min., 40 °C, detection at 215 nm. Retention  
26 time (min): 39.5 (major) and 44.1 (minor).

## 27 (S)-3-Propylnonanoic acid (**3h**)

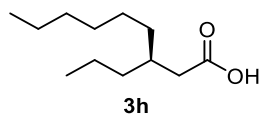

1

2 The reaction was performed with **1a** (144.1 mg, 1.0 mmol, 1.0 equiv.), CuBr·SMe<sub>2</sub> (10.3 mg, 0.05  
 3 mmol, 5 mol%), ligand (*R*)-**L4** (40.7 mg, 0.06 mmol, 6 mol%), Me<sub>3</sub>SiOTf (398 μL, 2.2 mmol, 2.2  
 4 equiv), *t*BuOMe (10.0 mL) at –20 °C, and *n*HexMgBr (2.5 mmol, 2.0 M in Et<sub>2</sub>O, 2.5 equiv.) was  
 5 added with syringe pump in 10 min. The reaction was quenched with HCl aqueous solution (5.0 mL,  
 6 1.0 M) and warmed to RT. The mixture was extracted with CH<sub>2</sub>Cl<sub>2</sub> (30.0 mL × 3). The combined  
 7 organic phase was dried over MgSO<sub>4</sub>, filtered and evaporated on rotary evaporator. Pentane (3.0 mL ×  
 8 3) was added to the residue and the mixture was filtered with a small piece of cotton in glass pipette to  
 9 remove most of the catalyst. product **3h** was obtained as a colorless oil after column chromatography  
 10 (SiO<sub>2</sub>, pentane:Et<sub>2</sub>O = 10:1) [99% conversion, 79% yield, 98% *ee*].

11 <sup>1</sup>H NMR (CDCl<sub>3</sub>, 400 MHz): δ 2.27 (d, *J* = 6.8 Hz, 2H, CH<sub>2</sub>CO<sub>2</sub>H), 1.93-1.80 (m, 1H, CH), 1.39-1.19  
 12 (m, 14H, CH<sub>2</sub>), 0.94-0.83 (m, 6H, CH<sub>3</sub>).

13 <sup>13</sup>C NMR (CDCl<sub>3</sub>, 100 MHz): δ 180.4, 39.2, 36.3, 34.8, 34.0, 32.0, 29.7, 26.6, 22.8, 19.8, 14.4, 14.2.

14 HRMS (ESI, *m/z*): calcd. for C<sub>12</sub>H<sub>23</sub>O<sub>2</sub> [M–H]<sup>–</sup>: 199.17035, found: 199.17054.

15 The *ee* of this compound was determined from the corresponding *N,N*-dimethyl amide derivative.  
 16 HPLC: Chiracel-ODH, *n*heptane/*i*PrOH 98:2, 0.5 mL/min., 40 °C, detection at 207 nm. Retention time  
 17 (min): 12.8 (major) and 13.6 (minor).

18 **(S)-3-Methylnonanoic acid (3i)**

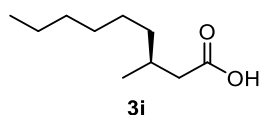

19

20 The reaction was performed with **1b** (17.2 mg, 0.2 mmol, 1.0 equiv.), CuBr·SMe<sub>2</sub> (2.06 mg, 0.01  
 21 mmol, 5 mol%), ligand (*R*)-**L4** (8.15 mg, 0.012 mmol, 6 mol%), Me<sub>3</sub>SiOTf (80 μL, 0.44 mmol, 2.2  
 22 equiv), *n*HexMgBr (0.5 mmol, 2.0 M in Et<sub>2</sub>O, 2.5 equiv.), *t*BuOMe (2.0 mL) at –78 °C for 16 h, and  
 23 following General Work-up **A**. Product **3i** was obtained as a colorless oil after column  
 24 chromatography (SiO<sub>2</sub>, pentane:Et<sub>2</sub>O = 15:1) [97% conversion, 84% yield, 98% *ee*].

25 <sup>1</sup>H NMR (CDCl<sub>3</sub>, 400 MHz): δ 2.35 (dd, *J* = 14.9, 5.9 Hz, 1H, CHHCO<sub>2</sub>H), 2.14 (dd, *J* = 14.9, 8.1 Hz,  
 26 1H, CHHCO<sub>2</sub>H), 2.03-1.88 (m, 1H, CH), 1.39-1.14 (m, 10H, CH<sub>2</sub>), 0.96 (d, *J* = 6.6 Hz, 1H, CH<sub>3</sub>CH),  
 27 0.87 (t, *J* = 6.6 Hz, 1H, CH<sub>3</sub>CH<sub>2</sub>).

28 <sup>13</sup>C NMR (CDCl<sub>3</sub>, 100 MHz): δ 180.2, 41.8, 36.8, 32.0, 30.3, 29.5, 27.0, 22.8, 19.8, 14.2.

1 HRMS (ESI, m/Z): calcd. for C<sub>10</sub>H<sub>19</sub>O<sub>2</sub> [M-H]<sup>-</sup>: 171.13905, found: 171.13929.

2 The *ee* of this compound was determined from the corresponding *N,N*-dimethyl amide derivative.  
3 HPLC: Chiracel-ASH, *n*heptane/*i*PrOH 99:1, 0.5 mL/min., 40 °C, detection at 206 nm. Retention time  
4 (min): 14.4 (major) and 16.0 (minor).

## 5 Decarboxylative cross-coupling reactions

6 (*S*)-1-(2-Ethylpentyl)-4-methoxy-benzene (**4a**)

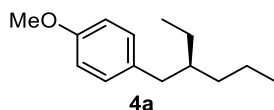

9 **Procedure for *in situ* Ni-catalyzed decarboxylative alkylation of **2k**.** The reaction was performed  
10 according to the literature.<sup>11</sup> In a flame-dried Schlenk tube equipped with septum and magnetic stirring  
11 bar, **2k** (44.5 mg, 0.2 mmol, 1.0 equiv.) and HATU (76.05 mg, 0.2 mmol, 1.0 equiv.) were dissolved in  
12 DMF (1.0 mL). Et<sub>3</sub>N (28 μL, 0.2 mmol, 1.0 equiv) was added and the mixture was stirred under  
13 nitrogen atmosphere for 30 min. at RT. A solution of NiCl<sub>2</sub>·glyme (8.78 mg, 0.04 mmol, 20 mol%),  
14 and 4,4'-di-*t*-butyl-2,2'-dipyridyl (21.5 mg, 0.08 mmol, 40 mol%) in DMF (1.0 mL) was added, and  
15 the mixture was stirred for 5 min. Diethylzinc (0.4 mmol, 1.0 M in hexane, 2.0 equiv) was then added  
16 with syringe pump in 30 min. The resulting mixture was allowed to stir for 16 h at RT. The reaction  
17 mixture was quenched with HCl aqueous solution (3.0 mL, 1.0 M) and extracted with Et<sub>2</sub>O (10.0 mL ×  
18 3). The organic layer was washed with water and brine and dried over MgSO<sub>4</sub>. The organic layer was  
19 concentrated under vacuum by rotary evaporator in a water bath at 40 °C. The crude product was  
20 purified by silica gel flash column chromatography (SiO<sub>2</sub>, pentane:Et<sub>2</sub>O = 400:1) to yield pure product  
**4a** as a colorless oil. [41% yield, 96% *ee*].

21 <sup>1</sup>H NMR (CDCl<sub>3</sub>, 400 MHz): δ 7.10-7.04 (m, 2H, H<sub>Ar</sub>), 6.86-6.79 (m, 2H, H<sub>Ar</sub>), 3.79 (s, 3H, CH<sub>3</sub>O),  
22 2.49 (dd, *J* = 14.0, 7.0 Hz, 1H, PhCHH), 2.45 (dd, *J* = 14.0, 7.0 Hz, 1H, PhCHH), 1.58-1.48 (m, 1H,  
23 CH), 1.39-1.17 (m, 6H, CH<sub>2</sub>), 0.94-0.82 (m, 6H, CH<sub>3</sub>CH<sub>2</sub>, CH<sub>2</sub>CH<sub>2</sub>CH<sub>3</sub>).

24 <sup>13</sup>C NMR (CDCl<sub>3</sub>, 100 MHz): δ 157.7, 134.0, 130.2, 113.6, 55.4, 41.2, 39.3, 35.1, 25.5, 19.9, 14.6,  
25 10.9.

26 HRMS was measured after transforming to **4f**, see compound **4f**.

27 The *ee* of this compound was determined after transforming it to **4f**, see compound **4f**.

28 (*R*)-4,4,5,5-Tetramethyl-2-(2-(4-methoxybenzyl)butyl)-1,3,2-dioxaborolane (**4b**)

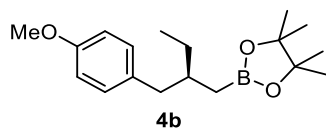

1

2 **Preparation of NiCl<sub>2</sub>·6H<sub>2</sub>O/4,4'-dimethoxy-2,2'-bipyridyl suspension (0.05 M in DMF).** In a  
 3 flame-dried Schlenk tube equipped with septum and magnetic stirring bar, NiCl<sub>2</sub>·6H<sub>2</sub>O (9.5 mg, 0.04  
 4 mmol) and 4,4'-dimethoxy-2,2'-bipyridyl (11.2 mg, 0.052 mmol) were dissolved in DMF (0.8 mL),  
 5 and the mixture was stirred under nitrogen atmosphere for 16 h to afford a pale green suspension.

6 **Preparation of [B<sub>2</sub>pin<sub>2</sub>Me]Li complex (0.6 M in THF and Et<sub>2</sub>O).** In a flame-dried Schlenk tube  
 7 equipped with septum and magnetic stirring bar, MeLi (0.75 mL, 1.6 M in Et<sub>2</sub>O, 1.2 mmol) was added  
 8 to a solution of B<sub>2</sub>pin<sub>2</sub> (335.2 mg, 1.32 mmol) in THF (1.25 mL) at 0 °C under nitrogen atmosphere.  
 9 The reaction mixture was warmed to RT and stirred for 1 h to afford a suspension (sometimes a clear  
 10 solution was observed).

11 **Procedure for *in situ* Ni-catalyzed decarboxylative borylation of 2k.** The reaction was performed  
 12 according to the literature.<sup>12</sup> In a flame-dried Schlenk tube equipped with septum and magnetic stirring  
 13 bar, **2k** (44.5 mg, 0.2 mmol, 1.0 equiv.), N-hydroxyphthalimide (32.6 mg, 0.2 mmol, 1.0 equiv.) and  
 14 *N,N'*-dicyclohexylcarbodiimide (31 μL, 0.2 mmol, 1.0 equiv.) were dissolved in CH<sub>2</sub>Cl<sub>2</sub> (2.0 mL). The  
 15 resulting mixture was stirred under nitrogen atmosphere for 2 h at RT before the volatiles were  
 16 removed *in vacuo*. MgBr<sub>2</sub>·OEt<sub>2</sub> (77 mg, 0.3 mmol, 1.5 equiv.) was added, and the tube was evacuated  
 17 and backfilled with nitrogen for three times. NiCl<sub>2</sub>·6H<sub>2</sub>O/4,4'-dimethoxy-2,2'-bipyridyl suspension  
 18 (0.4 mL, 0.02 mmol, 10 mol%) was added, and the mixture was stirred vigorously for 10 min. at RT.  
 19 The mixture was subsequently cooled to 0 °C and [B<sub>2</sub>pin<sub>2</sub>Me]Li complex (1.0 mL, 0.6 mmol, 3.0  
 20 equiv.) was added in one portion (note: do not add it dropwise!). After stirring at 0 °C for 1 h, the  
 21 reaction was warmed to RT and stirred for another 1 h. The reaction mixture was then quenched with  
 22 HCl aqueous solution (5.0 mL, 0.1 M) and extracted with Et<sub>2</sub>O (10.0 mL × 3). The combined organic  
 23 layers were dried over MgSO<sub>4</sub>, concentrated *in vacuo* and purified by column chromatography (SiO<sub>2</sub>,  
 24 pentane:Et<sub>2</sub>O = 40:1) to afford pure product **4b** as a colorless oil. [32% yield, 96% *ee*].

25 <sup>1</sup>H NMR (CDCl<sub>3</sub>, 400 MHz): δ 7.11-7.06 (m, 2H, H<sub>Ar</sub>), 6.84-6.78 (m, 2H, H<sub>Ar</sub>), 3.78 (s, 3H, CH<sub>3</sub>O),  
 26 2.52 (dd, *J* = 13.5, 7.0 Hz, 1H, PhCHH), 2.47 (dd, *J* = 13.5, 6.9 Hz, 1H, PhCHH), 1.86-1.74 (m, 1H,  
 27 CH), 1.42-1.29 (m, 1H, CH<sub>3</sub>CHH), 1.29-1.15 (m, 1H, CH<sub>3</sub>CHH), 1.24 (s, 12H, CCH<sub>3</sub>), 0.88 (t, *J* = 7.4  
 28 Hz, 3H, CH<sub>3</sub>CH<sub>2</sub>), 0.78 (dd, *J* = 15.6, 6.9 Hz, 1H, CHHB), 0.73 (dd, *J* = 15.6, 7.1 Hz, 1H, CHHB).

29 <sup>13</sup>C NMR (CDCl<sub>3</sub>, 100 MHz): δ 157.7, 133.9, 130.4, 113.6, 83.0, 55.4, 41.9, 38.2, 28.4, 25.0, 25.0,  
 30 11.3.

31 HRMS was measured after transforming to **4g**, see compound **4g**.

1 The *ee* of this compound was determined after transforming to **4g**, see compound **4g**.

2 **(R)-(2-Bromo-1-methylethyl)benzene (4c)**<sup>13</sup>

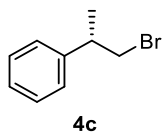

4 **Preparation of Ag(Phen)<sub>2</sub>OTf.**<sup>14</sup> The reaction was performed according to the literature.<sup>14</sup> To a stirred  
5 mixture of AgOTf (256.9 mg, 1.0 mmol, 1.0 equiv.) in MeOH (5.0 mL) was added 1,10-  
6 phenanthroline anhydrate (360.4 mg, 2.0 mmol, 2.0 equiv.) in MeOH (10.0 mL). The colorless  
7 solution turned into yellow suspension on adding a 1,10-phenanthroline solution. After stirring for  
8 three hours the solid was collected on a Kiriya filter and washed with MeOH, then dried under  
9 vacuum for overnight to give Ag(phen)<sub>2</sub>OTf as yellow solid [71% yield].

10 <sup>1</sup>H NMR (DMSO-*d*<sub>6</sub>, 400 MHz): 9.16 (dd, *J* = 4.5, 1.6 Hz, 4H, *H*<sub>Ar</sub>), 8.79 (dd, *J* = 8.1, 1.6 Hz, 4H,  
11 *H*<sub>Ar</sub>), 8.23 (s, 4H, *H*<sub>Ar</sub>), 8.01 (dd, *J* = 8.1, 4.5 Hz, 4H, *H*<sub>Ar</sub>).

12 **Procedure for Ag-catalyzed decarboxylative bromination of 3b.** The reaction was performed  
13 according to the literature.<sup>15</sup> In a Schlenk tube equipped with septum and magnetic stirring bar, **3b** (32.8  
14 mg, 0.2 mmol, 1.0 equiv.), Ag(Phen)<sub>2</sub>OTf (12.0 mg, 0.02 mmol, 10 mol%), dibromoisocyanuric acid  
15 (172.1 mg, 0.6 mmol, 3.0 equiv.) and 1,2-dichloroethane (8 mL) were added. The mixture was heated  
16 at 60 °C under nitrogen atmosphere for 16 h. The reaction was cooled to RT and pentane (10 mL) was  
17 added. The reaction mixture was filtered and washed with pentane. The combined organic phase was  
18 concentrated under reduced pressure. Product **4c** was obtained as a colorless oil after column  
19 chromatography (SiO<sub>2</sub>, pentane), and the components were visualized by PMA [46% yield, 99% *ee*].

20 <sup>1</sup>H NMR (CDCl<sub>3</sub>, 400 MHz): δ 7.37-7.29 (m, 2H, *H*<sub>Ar</sub>), 7.28-7.19 (m, 2H, *H*<sub>Ar</sub>), 3.58 (dd, *J* = 9.9, 6.0  
21 Hz, 1H, *CHHBr*), 3.48 (dd, *J* = 9.9, 8.0 Hz, 1H, *CHHBr*), 3.19-3.08 (m, 1H, *CH*), 1.42 (d, *J* = 6.9, 3H,  
22 *CH*<sub>3</sub>).

23 <sup>13</sup>C NMR (CDCl<sub>3</sub>, 100 MHz): δ 143.9, 128.7, 127.2, 127.1, 42.4, 40.1, 20.1.

24 HPLC: Chiracel-OJH, *n*heptane/*i*PrOH 98:2, 0.5 mL/min., 40 °C, detection at 208 nm. Retention time  
25 (min): 9.1 (major) and 10.0 (minor).

26 **(S)-1-Azido-2-propyloctane (4d)**

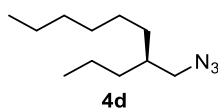

1 **Preparation of MesSO<sub>2</sub>N<sub>3</sub>.**<sup>16</sup> The reaction was performed according to the literature.<sup>17</sup> A warmed (45  
2 °C) solution of MesSO<sub>2</sub>Cl (1093.5 mg, 5.0 mmol, 1.0 equiv.) in ethanol (5.0 mL) was added to sodium  
3 azide (487.6 mg, 7.5 mmol, 1.5 equiv.) in water (1.0 mL) and ethanol (2.0 mL). The mixture was  
4 stirred for 3 h at room temperature and then concentrated by rotary evaporation, gradually warming  
5 the bath from 10 °C to 35 °C to prevent foaming. Water was added to the residue (5.0 mL) and the  
6 aqueous phase was extracted with Et<sub>2</sub>O (10.0 mL × 3). The combined organic layer was dried over  
7 MgSO<sub>4</sub>, filtered and evaporated on rotary evaporator. MesSO<sub>2</sub>N<sub>3</sub> was obtained as a colorless oil after  
8 column chromatography (SiO<sub>2</sub>, pentane:Et<sub>2</sub>O = 100:1), and the components were visualized by PMA  
9 staining [81% yield].

10 <sup>1</sup>H NMR (CDCl<sub>3</sub>, 400 MHz): δ 7.02 (s, 2H, H<sub>Ar</sub>), 2.66 (s, 6H, CH<sub>3</sub>), 2.34 (s, 3H, CH<sub>3</sub>).

11 <sup>13</sup>C NMR (CDCl<sub>3</sub>, 100 MHz): δ 144.7, 140.1, 133.4, 132.3, 22.9, 21.3.

12 **Procedure for Ag-catalyzed decarboxylative azidation of 3h.** The reaction was performed  
13 according to the literature.<sup>18</sup> In a Schlenk tube equipped with septum and magnetic stirring bar, **3h**  
14 (120.2 mg, 0.6 mmol, 1.0 equiv.), AgF (22.8 mg, 0.18 mmol, 30 mol%) and K<sub>2</sub>S<sub>2</sub>O<sub>8</sub> (162.2 mg, 0.6  
15 mmol, 1.0 equiv.) were added, followed by addition of CH<sub>3</sub>CN (6.0 mL), H<sub>2</sub>O (6.0 mL) and  
16 MesSO<sub>2</sub>N<sub>3</sub> (270.3 mg, 1.2 mmol, 2.0 equiv.). The mixture was heated at 55 °C under nitrogen  
17 atmosphere for 48 h. The reaction was cooled to RT and the mixture was extracted with Et<sub>2</sub>O (10.0  
18 mL × 3). The combined organic layer was dried over MgSO<sub>4</sub>, filtered and evaporated on rotary  
19 evaporator. Product **4d** was obtained as a colorless oil after column chromatography (SiO<sub>2</sub>, pentane),  
20 and the components were visualized by bromocresol green staining. [53% yield, 98% *ee*].

21 <sup>1</sup>H NMR (CDCl<sub>3</sub>, 400 MHz): δ 3.23 (d, *J* = 5.9 Hz, 2H, CH<sub>2</sub>N<sub>3</sub>), 1.61-1.45 (m, 1H, CH), 1.37-1.22 (m,  
22 14H, CH<sub>2</sub>), 0.97-0.84 (m, 6H, CH<sub>3</sub>).

23 <sup>13</sup>C NMR (CDCl<sub>3</sub>, 100 MHz): δ 55.4, 38.1, 34.2, 32.0, 31.9, 29.7, 26.7, 22.8, 19.9, 14.5, 14.2.

24 HRMS was measured after transforming to **4e**, see compound **4e**.

25 The *ee* of this compound was determined after transforming to **4e**, see compound **4e**.

26 **(S)-1-(2-Propyl)octyl-4-phenyl-1H-1,2,3-triazole (4e)**

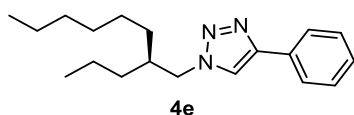

28 **Procedure for Cu-catalyzed click reaction of 4d.** The reaction was performed according to the  
29 literature.<sup>19</sup> In a flame-dried Schlenk tube equipped with septum and magnetic stirring bar, CuTc (7.6  
30 mg, 0.04 mmol, 20 mol%) was added to a solution of **4d** (39.5 mg, 0.2 mmol, 1.0 equiv.) and

1 phenylacetylene (24.5 mg, 0.24 mmol, 1.2 equiv.) in Toluene (2.0 mL). The reaction mixture was  
2 stirred under nitrogen atmosphere for 2 h at RT before the volatiles were removed *in vacuo*. Product **4e**  
3 was obtained as a white solid after column chromatography (SiO<sub>2</sub>, pentane:Et<sub>2</sub>O = 10:1) [78% yield,  
4 98% *ee*].

5 <sup>1</sup>H NMR (CDCl<sub>3</sub>, 400 MHz): δ 7.88-7.82 (m, 2H, *H*<sub>Ar</sub>), 7.71 (s, 1H, *H*<sub>Ar</sub>), 7.46-7.39 (m, 2H, *H*<sub>Ar</sub>), 7.36-  
6 7.30 (m, 1H, *H*<sub>Ar</sub>), 4.29 (d, *J* = 6.8 Hz, 2H, CH<sub>2</sub>N), 1.99 (m, *J* = 6.1 Hz, 1H, CH), 1.44-1.17 (m, 14H,  
7 CH<sub>2</sub>), 0.94-0.82 (m, 6H, CH<sub>3</sub>).

8 <sup>13</sup>C NMR (CDCl<sub>3</sub>, 100 MHz): δ 147.7, 130.9, 128.9, 128.1, 125.8, 120.0, 54.1, 39.0, 33.7, 31.9, 31.4,  
9 29.6, 26.4, 22.7, 19.6, 14.4, 14.2.

10 HRMS (ESI, *m/z*): calcd. for C<sub>19</sub>H<sub>30</sub>N<sub>3</sub> [M+H]<sup>+</sup>: 300.24342, found: 300.24378.

11 HPLC: Chiracel-OZH, *n*heptane/*i*PrOH 90:10, 0.5 mL/min., 40 °C, detection at 245 nm. Retention  
12 time (min): 32.3 (minor) and 34.7 (major).

13

#### 14 (S)-4-(2-Ethylpentyl)phenol (**4f**)

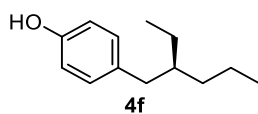

16 The reaction was performed according to the literature.<sup>20</sup> **4a** (16.5 mg, 0.08 mmol), Aliquat-336 (50 mg)  
17 and HBr aqueous solution (47%, 1 mL) was added to a Schlenk tube equipped with septum and  
18 magnetic stirring bar. The resulting reaction mixture was heated at 105 °C under nitrogen atmosphere  
19 for 16 h. The reaction was cooled to RT and water was added (2.0 mL). The mixture was extracted  
20 with Et<sub>2</sub>O (10.0 mL × 3), and the combined organic layer was dried over MgSO<sub>4</sub>, filtered and  
21 evaporated on rotary evaporator. The crude product was purified by silica gel flash column  
22 chromatography (SiO<sub>2</sub>, pentane:Et<sub>2</sub>O = 10:1) to yield pure product **4f** as a colorless oil. [96% *ee*].

23 <sup>1</sup>H NMR (CDCl<sub>3</sub>, 400 MHz): δ 7.04-6.99 (m, 2H, *H*<sub>Ar</sub>), 6.77-6.72 (m, 2H, *H*<sub>Ar</sub>), 4.62 (s, 1H, OH), 2.47  
24 (dd, *J* = 14.0, 7.0 Hz, 1H, PhCHH), 2.45 (dd, *J* = 14.1, 7.1 Hz, 1H, PhCHH), 1.51 (m, *J* = 6.4 Hz, 1H,  
25 CH), 1.39-1.16 (m, 6H, CH<sub>2</sub>), 0.92-0.81 (m, 6H, CH<sub>3</sub>).

26 <sup>13</sup>C NMR (CDCl<sub>3</sub>, 100 MHz): δ 153.5, 134.2, 130.4, 115.0, 41.2, 39.3, 35.1, 25.5, 19.9, 14.6, 10.9.

27 HRMS (ESI, *m/z*): calcd. for C<sub>13</sub>H<sub>19</sub>O [M-H]<sup>-</sup>: 191.14414, found: 191.14423.

28 HPLC: Chiracel-OZH, *n*heptane/*i*PrOH 99:1, 0.5 mL/min., 40 °C, detection at 224 nm. Retention time  
29 (min): 63.3 (major) and 69.8 (minor).



1 **(R)-2-(4-Methoxybenzyl)butan-1-ol (4g)**<sup>21</sup>

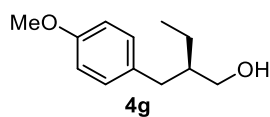

3 The reaction was performed according to the literature.<sup>22</sup> In a Schlenk tube equipped with septum and  
4 magnetic stirring bar, **4b** (18.3 mg, 0.06 mmol, 1.0 equiv.) was dissolved in 1 mL THF and 1 mL H<sub>2</sub>O.  
5 NaBO<sub>3</sub>·4H<sub>2</sub>O (27.6 mg, 0.18 mmol, 3.0 equiv.) was added and the reaction mixture was stirred under  
6 nitrogen atmosphere for 16 h at RT. Water (2.0 mL) was added and the mixture was extracted with  
7 Et<sub>2</sub>O (10.0 mL × 3). The combined organic phase was dried over MgSO<sub>4</sub>, filtered and evaporated on  
8 rotary evaporator. Product **4g** was obtained as a colorless oil after column chromatography (SiO<sub>2</sub>,  
9 pentane:Et<sub>2</sub>O = 4:1). [96% *ee*].

10 <sup>1</sup>H NMR (CDCl<sub>3</sub>, 400 MHz): δ 7.13-7.08 (m, 2H, *H*<sub>Ar</sub>), 6.86-6.81 (m, 2H, *H*<sub>Ar</sub>), 3.79 (s, 3H, CH<sub>3</sub>O),  
11 3.54 (d, *J* = 5.3 Hz, 2H, CH<sub>2</sub>OH), 2.58 (d, *J* = 7.1 Hz, 2H, PhCH<sub>2</sub>), 1.75-1.63 (m, 1H, CH), 1.45-1.31  
12 (m, 2H, CH<sub>3</sub>CH<sub>2</sub>), 0.94 (t, *J* = 7.5 Hz, 3H, CH<sub>3</sub>CH<sub>2</sub>).

13 <sup>13</sup>C NMR (CDCl<sub>3</sub>, 100 MHz): δ 158.0, 132.9, 130.2, 113.9, 64.7, 55.4, 44.4, 36.5, 23.4, 11.5.

14 HRMS (ESI, *m/z*): calcd. for C<sub>12</sub>H<sub>17</sub>O<sub>2</sub> [M-H]<sup>-</sup>: 193.12340, found: 193.12357.

15 HPLC: Chiracel-ODH, *n*heptane/*i*PrOH 95:5, 0.5 mL/min., 40 °C, detection at 224 nm. Retention time  
16 (min): 20.6 (major) and 22.7 (minor).

17 **Functionalization of 5a**

18 **(R)-3-(4-hydroxy-3-(5,6,7,8-tetrahydro-5,5,8,8-tetramethyl-3-pentyloxy-2-naphthalenyl)phenyl)**  
19 **butanoic acid (5b)**

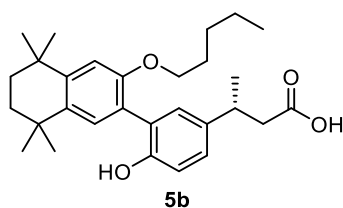

21 The reaction was performed with **5a** (21.8 mg, 0.05 mmol, 1.0 equiv.), CuBr·SMe<sub>2</sub> (1.03 mg, 0.005  
22 mmol, 10 mol%), ligand (*R,R*)-**L5** (3.04 mg, 0.006 mmol, 12 mol%), Me<sub>3</sub>SiOTf (36 μL, 0.2 mmol, 4.0  
23 equiv), MeMgBr (0.2 mmol, 3.0 M in Et<sub>2</sub>O, 4.0 equiv.), *t*BuOMe (0.5 mL), Toluene (0.5 mL) at -20  
24 °C. The reaction was quenched with HCl aqueous solution (2.0 mL, 1.0 M) and warmed to RT. The  
25 mixture was extracted with CH<sub>2</sub>Cl<sub>2</sub> (10.0 mL × 3). The combined organic phase was dried over

1 MgSO<sub>4</sub>, filtered and evaporated on rotary evaporator. Product **5b** was obtained as a colorless oil after  
2 column chromatography (SiO<sub>2</sub>, pentane:Et<sub>2</sub>O = 5:1) [76% yield, 99% *ee*].

3 <sup>1</sup>H NMR (CDCl<sub>3</sub>, 400 MHz): δ 7.23 (s, 1H, *H*<sub>Ar</sub>), 7.16-7.10 (m, 2H, *H*<sub>Ar</sub>), 6.95 (d, *J* = 8.1 Hz, 1H, *H*<sub>Ar</sub>),  
4 6.93 (s, 1H, *H*<sub>Ar</sub>), 4.01 (t, *J* = 6.6 Hz, 2H, CH<sub>2</sub>O), 3.35-3.23 (m, 1H, CH), 2.70 (dd, *J* = 15.4, 6.4 Hz,  
5 1H, COCHH), 2.57 (dd, *J* = 15.5, 8.6 Hz, 1H, COCHH), 1.78-1.67 (m, 6H, CH<sub>2</sub>), 1.37-1.25 (m, 19H,  
6 CH<sub>2</sub>, CH<sub>3</sub>, CH<sub>3</sub>CH), 0.85 (t, *J* = 7.1 Hz, 3H, CH<sub>3</sub>CH<sub>2</sub>).

7 <sup>13</sup>C NMR (CDCl<sub>3</sub>, 100 MHz): δ 178.1, 152.8, 152.6, 146.3, 139.2, 137.8, 130.7, 129.7, 127.1, 127.0,  
8 125.7, 117.9, 111.4, 70.2, 42.9, 35.6, 35.3, 35.2, 34.7, 34.0, 32.1, 32.0, 29.0, 28.1, 22.4, 22.1, 14.1.

9 HRMS (ESI, *m/z*): calcd. for C<sub>29</sub>H<sub>41</sub>O<sub>4</sub> [M+H]<sup>+</sup>: 453.29994, found: 453.29935.

10 HPLC: Chiracel-ADH, *n*heptane/*i*PrOH 95:5, 0.5 mL/min., 40 °C, detection at 209 nm. Retention time  
11 (min): 30.3 (major) and 34.7 (minor).

12

### 13 **Catalytic asymmetric conjugate addition of EtMgBr to **11** followed by** 14 **intramolecular trapping**

#### 15 **(1*R*,2*R*)-2-Ethylcyclopentane-1-carboxylic acid (**6**)**

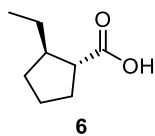

17 In a flame-dried Schlenk tube equipped with septum and magnetic stirring bar, **11** (38.6 mg, 0.2 mmol,  
18 1.0 equiv.), CuBr·SMe<sub>2</sub> (2.06 mg, 0.01 mmol, 5 mol%) and ligand (*R*)-**L4** (8.15 mg, 0.012 mmol, 6  
19 mol%) were dissolved in *t*BuOMe (2.0 mL) and stirred under nitrogen atmosphere for 20 min. at RT.  
20 The mixture was cooled to -78 °C and *n*BuLi (0.2 mmol, 2.5 M in hexane, 1.0 equiv.) was added.  
21 After 5 min., Me<sub>3</sub>SiOTf (80 μL, 0.44 mmol, 2.2 equiv) was added, and the mixture was allowed to stir  
22 for 5 min before EtMgBr (0.3 mmol, 3.0 M in Et<sub>2</sub>O, 1.5 equiv.) was added dropwise. The reaction  
23 mixture was stirred under nitrogen atmosphere for 2 h, and warmed to RT. After stirring for 16 h, the  
24 reaction mixture was quenched HCl aqueous solution (2.0 mL, 1.0 M) and extracted with CH<sub>2</sub>Cl<sub>2</sub>  
25 (10.0 mL × 3). The combined organic phase was dried over MgSO<sub>4</sub>, filtered and evaporated on rotary  
26 evaporator. Pentane (1.0 mL × 3) was added to the residue and the mixture was filtered with a small  
27 piece of cotton in glass pipette to remove most of the catalyst. Product **6** was obtained as a colorless  
28 oil after column chromatography (SiO<sub>2</sub>, pentane:Et<sub>2</sub>O = 10:1) [70% yield, 91% *ee*]. Relative  
29 configuration was determined by NOE experiments (see Supplementary Fig. 4).

1 <sup>1</sup>H NMR (CDCl<sub>3</sub>, 400 MHz): δ 2.36 (q, *J* = 8.2 Hz, 1H, CHCO<sub>2</sub>H), 2.13-2.01 (m, 1H, CHCHCO<sub>2</sub>H),  
2 2.00-1.82 (m, 3H, CH<sub>2</sub>), 1.76-1.52 (m, 3H, CH<sub>2</sub>), 1.37-1.17 (m, 3H, CH<sub>2</sub>), 0.92 (t, *J* = 7.4 Hz, 3H,  
3 CH<sub>3</sub>).

4 <sup>13</sup>C NMR (CDCl<sub>3</sub>, 100 MHz): δ 183.6, 50.1, 46.4, 32.4, 30.5, 28.2, 25.0, 12.7.

5 HRMS (ESI, *m/z*): calcd. for C<sub>8</sub>H<sub>15</sub>O<sub>2</sub> [M+H]<sup>+</sup>: 143.10666, found: 143.10720.

6 The *ee* of this compound was determined from the corresponding *N,N*-dimethyl amide derivative.  
7 HPLC: Chiracel-OZH, *n*heptane/*i*PrOH 95:5, 0.5 mL/min., 40 °C, detection at 208 nm. Retention time  
8 (min): 16.2 (major) and 18.4 (minor).

9

10

11

## 12 Synthesis of chiral indole derivative

### 13 (*S*)-Ethyl 6-chloro-3-(3-methylnonanoyl)-1*H*-indole-2-carboxylate (**7b**)

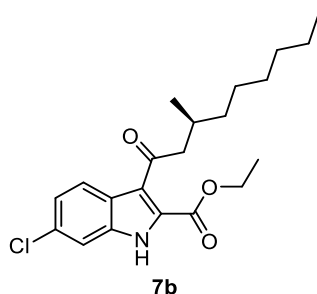

15 The reaction was performed according to the literature.<sup>23</sup> In a flame-dried Schlenk tube equipped with  
16 septum and magnetic stirring bar, **3i** (17.2 mg, 0.1 mmol, 1.0 equiv.) was dissolved in CH<sub>2</sub>Cl<sub>2</sub> (1.0  
17 mL). SOCl<sub>2</sub> (15 μL, 0.2 mmol, 2.0 equiv.) and DMF (1 drop) were added, and the reaction mixture  
18 was stirred under nitrogen atmosphere for 1 h at RT. The solvent and the remaining SOCl<sub>2</sub> were  
19 removed under reduced pressure and the tube was evacuated and backfilled with nitrogen for three  
20 times. CH<sub>2</sub>Cl<sub>2</sub> (1.0 mL) was added to afford a solution of acyl chloride of **3i** (0.1 M). In another flame-  
21 dried Schlenk tube equipped with septum and magnetic stirring bar, ethyl 6-chloro-1*H*-indole-2-  
22 carboxylate (22.4 mg, 0.1 mmol, 1.0 equiv.) was dissolved in CH<sub>2</sub>Cl<sub>2</sub> (1.0 mL). SnCl<sub>4</sub> (0.3 mmol, 1.0  
23 M in CH<sub>2</sub>Cl<sub>2</sub>, 3.0 equiv.) was added in a single portion *via* syringe and the mixture was stirred under  
24 nitrogen atmosphere for 30 min. at RT. The acyl chloride of **3i** (0.1 mmol, 0.1 M in CH<sub>2</sub>Cl<sub>2</sub>, 1.0  
25 equiv.) was transferred to the stirring solution *via* syringe, and the reaction mixture was reflux under  
26 nitrogen atmosphere for 16 h. The reaction was cooled to RT and quenched with water (3.0 mL). The

1 mixture was extracted with  $\text{CH}_2\text{Cl}_2$  (10.0 mL  $\times$  3), and the combined organic phase was dried over  
2  $\text{MgSO}_4$ , filtered and evaporated on rotary evaporator. Product **7b** was obtained as a white solid after  
3 column chromatography ( $\text{SiO}_2$ , pentane: $\text{Et}_2\text{O}$  = 8:1), and the components were visualized by 2,4-DNP  
4 staining [84% yield, 98% *ee*].

5  $^1\text{H}$  NMR ( $\text{CDCl}_3$ , 400 MHz):  $\delta$  9.47 (s, 1H, NH), 7.83 (d,  $J$  = 8.7 Hz, 1H,  $H_{\text{Ar}}$ ), 7.38 (d,  $J$  = 1.8 Hz,  
6 1H,  $H_{\text{Ar}}$ ), 7.18 (dd,  $J$  = 8.7, 1.8 Hz, 1H,  $H_{\text{Ar}}$ ), 4.45 (q,  $J$  = 7.1 Hz, 2H,  $\text{CO}_2\text{CH}_2$ ), 3.09 (dd,  $J$  = 15.8, 5.7  
7 Hz, 1H, COCHH), 2.88 (dd,  $J$  = 15.8, 8.1 Hz, 1H, COCHH), 2.18-2.04 (m, 1H, CH), 1.42 (t,  $J$  = 7.1  
8 Hz, 3H,  $\text{CO}_2\text{CH}_2\text{CH}_3$ ), 1.38-1.14 (m, 10H,  $\text{CH}_2$ ), 0.93 (d,  $J$  = 6.6 Hz, 3H,  $\text{CH}_3\text{CH}$ ), 0.85 (t,  $J$  = 6.8 Hz,  
9 3H,  $\text{CH}_2\text{CH}_2\text{CH}_3$ ).

10  $^{13}\text{C}$  NMR ( $\text{CDCl}_3$ , 100 MHz):  $\delta$  201.6, 160.8, 135.5, 132.2, 126.1, 125.2, 123.6, 123.5, 122.5, 111.7,  
11 62.2, 51.8, 37.2, 31.9, 30.5, 29.6, 27.1, 22.7, 20.1, 14.3, 14.2.

12 HRMS (ESI,  $m/z$ ): calcd. for  $\text{C}_{21}\text{H}_{29}\text{ClNO}_3$  [ $\text{M}+\text{H}$ ] $^+$ : 378.18305, found: 378.18322.

13 HPLC: Chiracel-ASH, *n*heptane/*i*PrOH 98:2, 0.5 mL/min., 40  $^\circ\text{C}$ , detection at 223 nm. Retention time  
14 (min): 29.9 (major) and 33.7 (minor).

## 15 Synthesis of *t*BuMe<sub>2</sub>Si-esters as the references

### 16 *t*-Butyldimethylsilyl hex-2-enoate

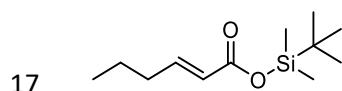

18 In a flame-dried Schlenk tube equipped with septum and magnetic stirring bar, **1a** (22.8 mg, 0.2 mmol,  
19 1.0 equiv.) was dissolved in *t*BuOMe (2.0 mL) and cooled down to  $-20$   $^\circ\text{C}$ . *t*BuMe<sub>2</sub>SiOTf (101  $\mu\text{L}$ ,  
20 0.44 mmol, 2.2 equiv.) was added. After 20 min.,  $\text{EtMgBr}$  (0.2 mmol, 3.0 M in  $\text{Et}_2\text{O}$ , 1.0 equiv.) was  
21 added dropwise, and the reaction mixture was allowed to stir for 5 min under nitrogen atmosphere.  
22 The reaction was quenched with saturated  $\text{NaHCO}_3$  aqueous solution (3.0 mL) and warmed to RT. The  
23 mixture was extracted with  $\text{Et}_2\text{O}$  (10.0 mL  $\times$  3). The combined organic phase was dried over  $\text{MgSO}_4$ ,  
24 filtered and evaporated on rotary evaporator. The product was obtained as a colorless oil after column  
25 chromatography ( $\text{SiO}_2$ , pentane: $\text{Et}_2\text{O}$  = 100:1) [19% yield].

26  $^1\text{H}$  NMR ( $\text{CDCl}_3$ , 400 MHz):  $\delta$  6.91 (dt,  $J$  = 15.5, 6.9 Hz, 1H,  $\text{CH}_2\text{CH}=\text{CH}$ ), 5.78 (dt,  $J$  = 15.5, 1.6 Hz,  
27 1H,  $\text{CH}_2\text{CH}=\text{CH}$ ), 2.17 (m,  $J$  = 7.2, 1.6 Hz, 2H,  $\text{CH}_2\text{CH}=\text{CH}$ ), 1.49 (m,  $J$  = 7.4 Hz, 2H,  $\text{CH}_3\text{CH}_2$ ),  
28 0.95 (s, 9H,  $\text{SiCCH}_3$ ), 0.94 (t,  $J$  = 7.3, 3H,  $\text{CH}_3\text{CH}_2$ ), 0.29 (s, 6H,  $\text{SiCH}_3$ ).

29  $^{13}\text{C}$  NMR ( $\text{CDCl}_3$ , 100 MHz):  $\delta$  166.8, 149.8, 123.4, 34.2, 25.8, 21.5, 17.9, 13.8,  $-4.6$ .

30 HRMS (ESI,  $m/z$ ): calcd. for  $\text{C}_{12}\text{H}_{25}\text{O}_2\text{Si}$  [ $\text{M}+\text{H}$ ] $^+$ : 299.16183, found: 299.16199.

1 ***t*-Butyldimethylsilyl but-2-enoate**<sup>24</sup>

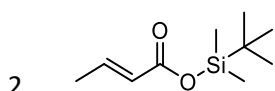

3 In a flame-dried Schlenk tube equipped with septum and magnetic stirring bar, **1b** (17.2 mg, 0.2  
4 mmol, 1.0 equiv.) was dissolved in *t*BuOMe (2.0 mL) and cooled to  $-20\text{ }^{\circ}\text{C}$ . *t*BuMe<sub>2</sub>SiOTf (101  $\mu\text{L}$ ,  
5 0.44 mmol, 2.2 equiv.) was added. After 20 min., EtMgBr (0.2 mmol, 3.0 M in Et<sub>2</sub>O, 1.0 equiv.) was  
6 added dropwise, and the reaction mixture was allowed to stir for 5 min under nitrogen atmosphere.  
7 The reaction was quenched with saturated NaHCO<sub>3</sub> aqueous solution (3.0 mL) and warmed to RT. The  
8 mixture was extracted with Et<sub>2</sub>O (10.0 mL  $\times$  3). The combined organic phase was dried over MgSO<sub>4</sub>,  
9 filtered and evaporated on rotary evaporator. The product was obtained as a colorless oil after column  
10 chromatography (SiO<sub>2</sub>, pentane:Et<sub>2</sub>O = 100:1) [13% yield].

11 <sup>1</sup>H NMR (CDCl<sub>3</sub>, 400 MHz):  $\delta$  6.92 (dq,  $J$  = 15.4, 6.9 Hz, 1H, CH<sub>3</sub>CH=CH), 5.81 (dt,  $J$  = 15.4, 1.7  
12 Hz, 1H, CH<sub>3</sub>CH=CH), 1.87 (dd,  $J$  = 6.9, 1.7 Hz, 3H, CH<sub>3</sub>CH=CH), 0.95 (s, 9H, SiCCH<sub>3</sub>), 0.28 (s, 6H,  
13 SiCH<sub>3</sub>).

14 <sup>13</sup>C NMR (CDCl<sub>3</sub>, 100 MHz):  $\delta$  166.6, 145.1, 124.8, 25.8, 18.0, 17.9,  $-4.6$ .

15 **Racemic *t*-Butyldimethylsilyl 3-ethylhexanoate**

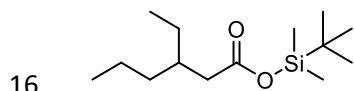

17 In a flame-dried Schlenk tube equipped with septum and magnetic stirring bar, **1a** (22.8 mg, 0.2 mmol,  
18 1.0 equiv.), CuBr·SMe<sub>2</sub> (2.06 mg, 0.01 mmol, 5 mol%) and THF (2.0 mL) were added. The mixture  
19 was cooled to  $-20\text{ }^{\circ}\text{C}$  and *t*BuMe<sub>2</sub>SiOTf (138  $\mu\text{L}$ , 0.6 mmol, 3.0 equiv.) was added. After 20 min.,  
20 EtMgBr (0.6 mmol, 3.0 M in Et<sub>2</sub>O, 3.0 equiv.) was added dropwise, and the reaction mixture was  
21 allowed to stir for 2 h. The reaction was quenched with saturated NaHCO<sub>3</sub> aqueous solution (3.0 mL)  
22 and warmed to RT. The mixture was extracted with Et<sub>2</sub>O (10.0 mL  $\times$  3). The combined organic phase  
23 was dried over MgSO<sub>4</sub>, filtered and evaporated on rotary evaporator. The product was obtained as a  
24 colorless oil after column chromatography (SiO<sub>2</sub>, pentane:Et<sub>2</sub>O = 100:1) [39% yield].

25 <sup>1</sup>H NMR (CDCl<sub>3</sub>, 400 MHz):  $\delta$  2.23 (d,  $J$  = 6.8 Hz, 2H, CH<sub>2</sub>CO<sub>2</sub>Si), 1.84-1.72 (m, 1H, CH), 1.43-1.18  
26 (m, 6H, CH<sub>2</sub>), 0.93 (s, 9H, SiCCH<sub>3</sub>), 0.91-0.85 (m, 6H, CH<sub>3</sub>CH<sub>2</sub>), 0.26 (s, 6H, SiCH<sub>3</sub>).

27 <sup>13</sup>C NMR (CDCl<sub>3</sub>, 100 MHz):  $\delta$  174.4, 40.8, 36.6, 35.9, 26.5, 25.7, 19.9, 17.7, 14.5, 11.0,  $-4.7$ .

28 HRMS (ESI,  $m/z$ ): calcd. for C<sub>14</sub>H<sub>31</sub>O<sub>2</sub>Si [M+H]<sup>+</sup>: 259.20878, found: 259.20940.

## 1 Isolation of the *t*BuMe<sub>2</sub>Si ester of **1a** and testing of its reactivity in Cu- 2 catalyzed asymmetric conjugate addition

3 In a flame-dried Schlenk tube equipped with septum and magnetic stirring bar, **1a** (22.8 mg, 0.2 mmol,  
4 1.0 equiv.) was dissolved in *t*BuOMe (2.0 mL) and cooled down to  $-78$  °C. *t*BuMe<sub>2</sub>SiOTf (101  $\mu$ L,  
5 0.44 mmol, 2.2 equiv.) was added. After 20 min., EtMgBr (0.2 mmol, 3.0 M in Et<sub>2</sub>O, 1.0 equiv.) was  
6 added dropwise, and the reaction mixture was allowed to stir for 5 min under nitrogen atmosphere.  
7 The reaction was quenched with HCl aqueous solution (2.0 mL, 1.0 M) and warmed to RT. The  
8 mixture was extracted with Et<sub>2</sub>O (10.0 mL  $\times$  3). The combined organic phase was dried over MgSO<sub>4</sub>,  
9 filtered and evaporated on rotary evaporator. The product was obtained as a colorless oil after column  
10 chromatography (SiO<sub>2</sub>, pentane:Et<sub>2</sub>O = 100:1) [22% conversion, 10% yield].

11 In a flame-dried Schlenk tube equipped with septum and magnetic stirring bar, the *t*BuMe<sub>2</sub>Si ester of  
12 **1a** (22.8 mg, 0.1 mmol, 1.0 equiv.), CuBr·SMe<sub>2</sub> (1.03 mg, 0.005 mmol, 5 mol%) and ligand (*R*)-**L4**  
13 (4.07 mg, 0.006 mmol, 6 mol%) were dissolved in *t*BuOMe (1.0 mL) and stirred under nitrogen  
14 atmosphere for 20 min. at RT. The mixture was cooled to  $-78$  °C and EtMgBr (0.15 mmol, 3.0 M in  
15 Et<sub>2</sub>O, 1.5 equiv.) was added dropwise. The reaction mixture was allowed to stir for 16 h. The reaction  
16 was quenched with HCl aqueous solution (1.0 mL, 1.0 M) and warmed to RT. The mixture was  
17 extracted with CH<sub>2</sub>Cl<sub>2</sub> (5.0 mL  $\times$  3). The combined organic phase was dried over MgSO<sub>4</sub>, filtered and  
18 evaporated on rotary evaporator. [**2a**:*t*BuMe<sub>2</sub>Si ester of **1a** = 12:88, 99% total conversion, 98% *ee*].

## 19 General Procedure for <sup>1</sup>H NMR spectroscopy based mechanistic studies

### 20 Formation of carboxylic acid **1b**-*t*BuMe<sub>2</sub>SiOTf complex

21 **1b** (4.3 mg, 0.05 mmol, 1.0 equiv.) was dissolved in CD<sub>2</sub>Cl<sub>2</sub> (0.5 mL) in a dry NMR tube under  
22 nitrogen atmosphere and cooled down to  $-78$  °C. *t*BuMe<sub>2</sub>SiOTf (25  $\mu$ L, 0.11 mmol, 2.2 equiv.) was  
23 added and the resulting mixture was measured by <sup>1</sup>H NMR spectroscopy at  $-55$  °C (see Fig. 3 in the  
24 main text).

### 25 *In situ* formation of *t*BuMe<sub>2</sub>Si ester of **1b**

26 **1b** (4.3 mg, 0.05 mmol, 1.0 equiv.) was dissolved in CD<sub>2</sub>Cl<sub>2</sub> (0.5 mL) in in a dry NMR tube under  
27 nitrogen atmosphere. The solution was cooled down to  $-78$  °C and *t*BuMe<sub>2</sub>SiOTf (25  $\mu$ L, 0.11 mmol,  
28 2.2 equiv.) was added. After 20 min., MeMgBr (0.05 mmol, 3.0 M in Et<sub>2</sub>O, 1.0 equiv.) was added  
29 dropwise and the resulting mixture was measured by <sup>1</sup>H NMR spectroscopy at  $-55$  °C (see Fig. 3 in  
30 the main text).

1 **General procedure for Cu-catalyzed asymmetric conjugate addition of**  
2 **EtMgBr to carboxylate salts formed first by deprotonation of 1a by base.**

3 In a flame-dried Schlenk tube equipped with septum and magnetic stirring bar, **1a** (22.8 mg, 0.2 mmol,  
4 1.0 equiv.), CuBr·SMe<sub>2</sub> (2.06 mg, 0.01 mmol, 5 mol%) and ligand (*R*)-**L4** (8.15 mg, 0.012 mmol, 6  
5 mol%) were dissolved in *t*BuOMe (2.0 mL) and stirred under nitrogen atmosphere for 20 min. at RT.  
6 The mixture was cooled to -78 °C and the base (0.2 mmol, 1.0 equiv.) was added (when NaH was  
7 used as the base, it should be added and stirred for 1 h at RT before the mixture is cooled to -78 °C  
8 because of its low solubility in *t*BuOMe). After 5 min., Me<sub>3</sub>SiOTf was added, then the mixture was  
9 allowed to stir for 5 min before EtMgBr was added dropwise. The reaction mixture was allowed to stir  
10 for 16 h. The reaction was quenched with HCl aqueous solution (2.0 mL, 1.0 M) and warmed to RT.  
11 The mixture was extracted with CH<sub>2</sub>Cl<sub>2</sub> (10.0 mL × 3). The combined organic phase was dried over  
12 MgSO<sub>4</sub>, filtered and evaporated on rotary evaporator (see Supplementary Table 3).

13 **General procedure for Cu-catalyzed asymmetric conjugate addition of**  
14 **EtMgBr to Li carboxylate A-Li with different electrophiles**

15 In a flame-dried Schlenk tube equipped with septum and magnetic stirring bar, **1a** (22.8 mg, 0.2 mmol,  
16 1.0 equiv.), CuBr·SMe<sub>2</sub> (2.06 mg, 0.01 mmol, 5 mol%) and ligand (*R*)-**L4** (8.15 mg, 0.012 mmol, 6  
17 mol%) were dissolved in *t*BuOMe (2.0 mL) and stirred under nitrogen atmosphere for 20 min. at RT.  
18 The mixture was cooled to -78 °C and *n*BuLi (0.2 mmol, 2.5 M in hexane, 1.0 equiv.) was added.  
19 After 5 min., the electrophile was added, and the mixture was allowed to stir for 5 min before EtMgBr  
20 (0.5 mmol, 3.0 M in Et<sub>2</sub>O, 2.5 equiv.) was added dropwise. The reaction mixture was allowed to stir  
21 for 16 h. The reaction was quenched with HCl aqueous solution (2.0 mL, 1.0 M) and warmed to RT.  
22 The mixture was extracted with CH<sub>2</sub>Cl<sub>2</sub> (10.0 mL × 3). The combined organic phase was dried over  
23 MgSO<sub>4</sub>, filtered and evaporated on rotary evaporator (see Supplementary Table 3)

24 **General procedure for the isolation and measurement of the solubility of**  
25 **Mg-, Li- and Na- carboxylates A-Mg, A-Li and A-Na in *t*BuOMe.**

26 In a flame-dried Schlenk tube equipped with septum and magnetic stirring bar, **1a** (144.1 mg, 1.0  
27 mmol, 1.0 equiv.) was dissolved in *t*BuOMe (10.0 mL) at RT. EtMgBr (1.0 mmol, 3.0 M in Et<sub>2</sub>O, 1.0  
28 equiv.) or *n*BuLi (1.0 mmol, 2.5 M in hexane, 1.0 equiv.) or NaH (1.0 mmol, 60% in mineral oil, 1.0  
29 equiv.) were added. The reaction mixture was allowed to stir for overnight at RT and the metal  
30 carboxylate has precipitated. The precipitate was centrifuged and washed with *t*BuOMe (10.0 mL × 3).  
31 The precipitate was dried *in vacuo* during overnight to give the metal carboxylates **A-Mg** or **A-Li** or  
32 **A-Na** as the white solid respectively.

1 The metal carboxylates **A-Mg** or **A-Li** or **A-Na** (0.1 mmol) was added to 50 mL *t*BuOMe, and the  
2 mixture was refluxed for 3 h, followed by addition of 1,3,5-trimethoxybenzene (8.4 mg, 0.05 mmol) as  
3 the internal standard. The mixture was filtered and the filtrate was evaporated on rotary evaporator.  
4 DMSO-*d*<sub>6</sub> was added and the corresponding <sup>1</sup>H NMR spectra of the samples were recorded (see  
5 Supplementary Figures 1-3). The solubility of **A-Mg**: 0.4318 mM, **A-Na**: 0.1225 mM. No peaks of **A-**  
6 **Li** were observed because the solubility is under NMR detection limit.

#### 7 **Magnesium bromide hex-2-enoate (A-Mg)**

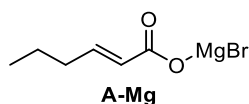

9 <sup>1</sup>H NMR (DMSO-*d*<sub>6</sub>, 400 MHz): δ 6.60 (dt, *J* = 15.5, 7.0 Hz, 1H, CH<sub>2</sub>CH=CH), 5.76-5.69 (m, 1H,  
10 CH<sub>2</sub>CH=CH), 2.13-2.04 (m, 2H, CH<sub>2</sub>CH=CH), 1.46-1.34 (m, 2H, CH<sub>3</sub>CH<sub>2</sub>), 0.88 (t, *J* = 7.4 Hz, 3H,  
11 CH<sub>3</sub>).

#### 12 **Lithium hex-2-enoate (A-Li)**

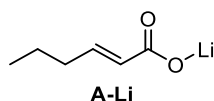

14 <sup>1</sup>H NMR (DMSO-*d*<sub>6</sub>, 400 MHz): δ 6.20 (dt, *J* = 14.6, 6.9 Hz, 1H, CH<sub>2</sub>CH=CH), 5.58 (dt, *J* = 15.3, 1.5  
15 Hz, 1H, CH<sub>2</sub>CH=CH), 2.02-1.94 (m, 2H, CH<sub>2</sub>CH=CH), 1.42-1.30 (m, 2H, CH<sub>3</sub>CH<sub>2</sub>), 0.86 (t, *J* = 7.4  
16 Hz, 3H, CH<sub>3</sub>).

#### 17 **Sodium hex-2-enoate (A-Na)**

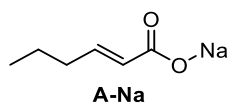

19 <sup>1</sup>H NMR (DMSO-*d*<sub>6</sub>, 400 MHz): δ 6.24-6.13 (m, 1H, CH<sub>2</sub>CH=CH), 5.58 (dt, *J* = 15.4, 1.4 Hz, 1H,  
20 CH<sub>2</sub>CH=CH), 2.02-1.93 (m, 2H, CH<sub>2</sub>CH=CH), 1.42-1.30 (m, 2H, CH<sub>3</sub>CH<sub>2</sub>), 0.86 (t, *J* = 7.3 Hz, 3H,  
21 CH<sub>3</sub>).



# 1 Supplementary Figures

2 Supplementary Figures 1-3 are for determining solubilities of Mg, Li- and Na- carboxylates  
3 (**A-Mg**, **A-Li** and **A-Na** respectively) in *t*BuOMe. Solubilities are: **A-Mg**: 0.4318 mM, **A-Na**:  
4 0.1225 mM. No peaks for **A-Li** were observed in  $^1\text{H}$  NMR (because the solubility is under  
5 NMR detection limit).

6

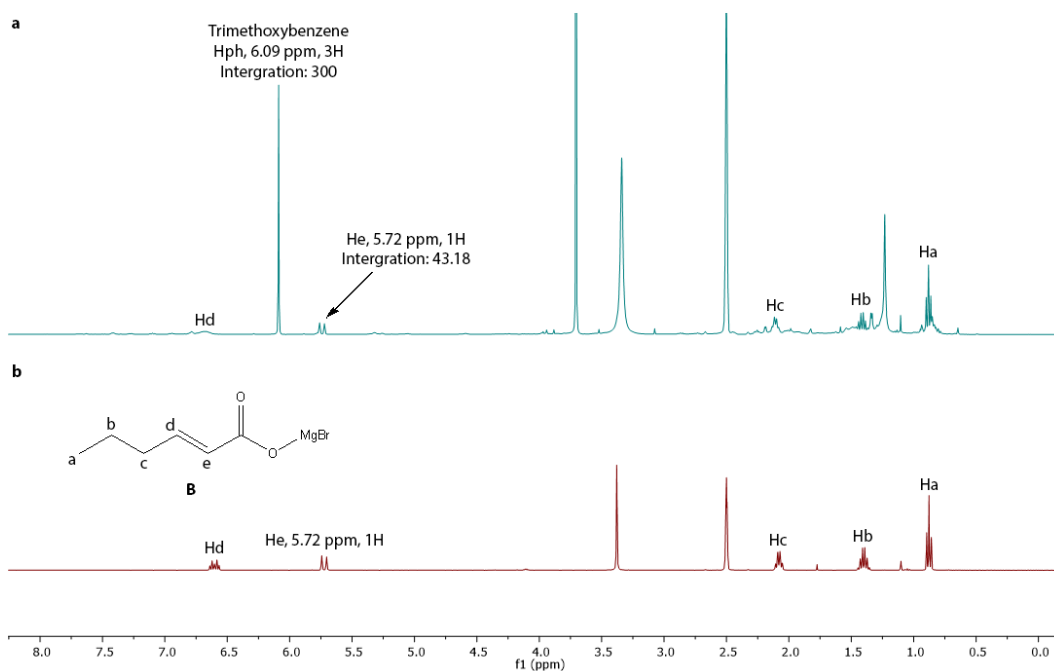

7

8 **Supplementary Figure 1. a**, Measurement of the solubility of Mg carboxylate **A-Mg** in  
9 *t*BuOMe.  $^1\text{H}$  NMR spectra were obtained after evaporating *t*BuOMe and dissolving the  
10 residue in  $\text{DMSO-}d_6$  using 1,3,5-trimethoxybenzene as the internal standard. **b**,  $^1\text{H}$  NMR  
11 spectrum of Mg carboxylate **A-Mg** in  $\text{DMSO-}d_6$  as the reference.

12

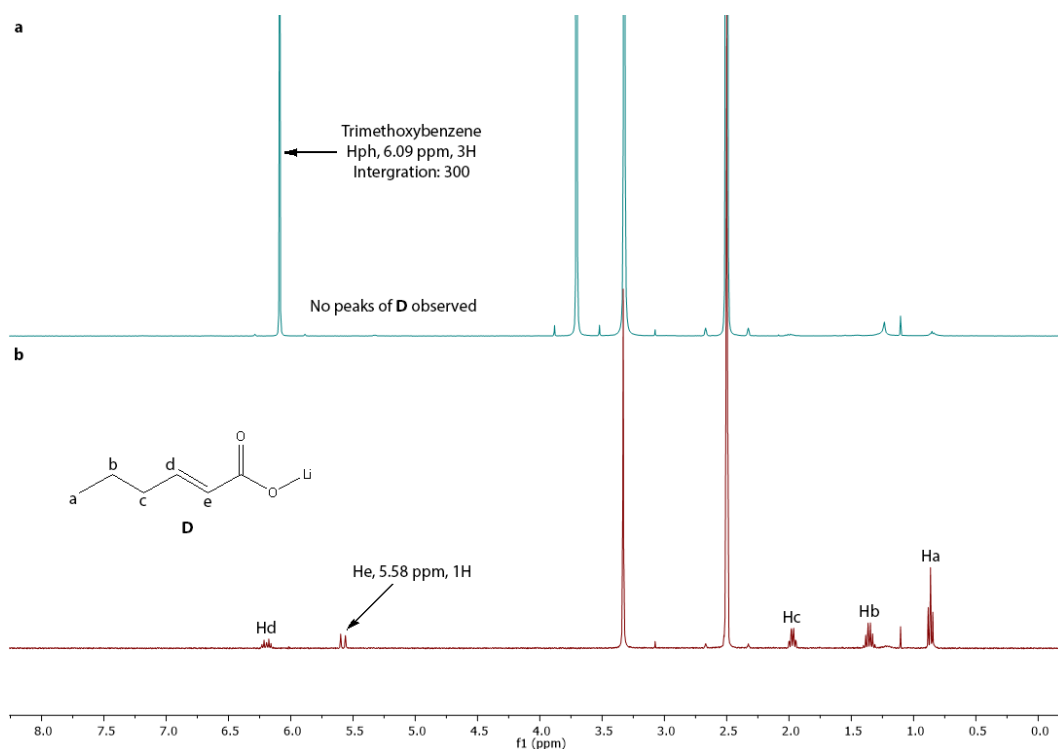

1

2 **Supplementary Figure 2.** **a**, Measurement of the solubility of Li carboxylate **A-Li** in  
 3 *t*BuOMe.  $^1\text{H}$  NMR spectra were obtained after evaporating *t*BuOMe and dissolving the  
 4 residue in  $\text{DMSO-}d_6$  using 1,3,5-trimethoxybenzene as the internal standard. **b**,  $^1\text{H}$  NMR  
 5 spectrum of Li carboxylate **A-Li** in  $\text{DMSO-}d_6$  as the reference.

6

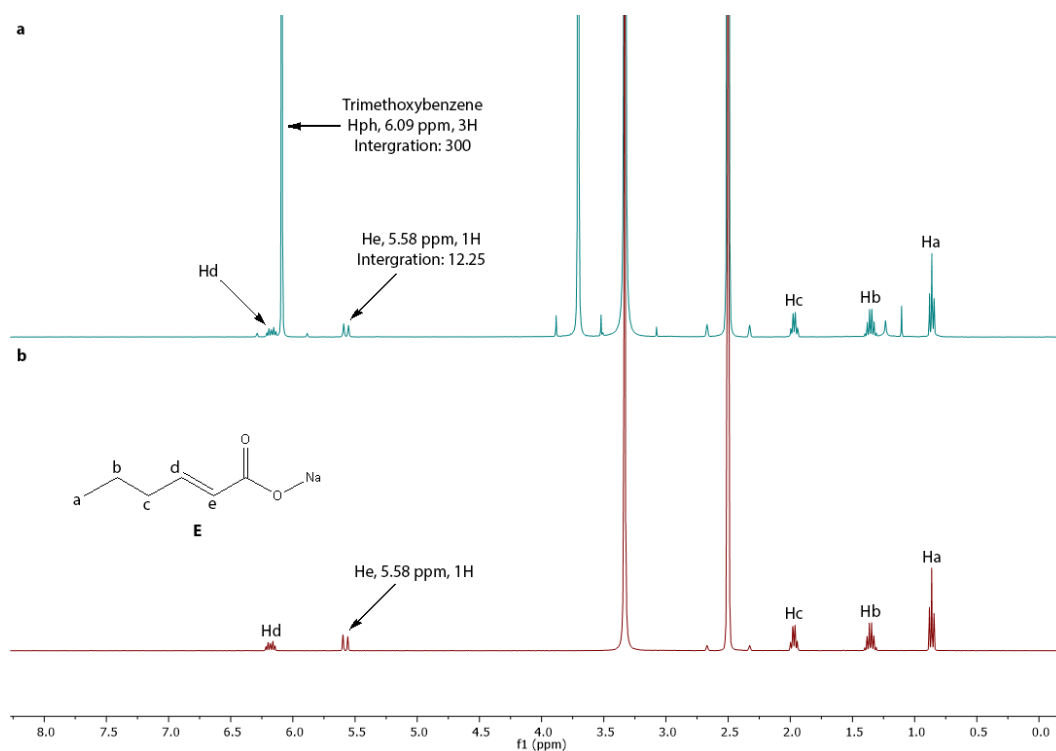

1

2 **Supplementary Figure 3. a**, Measurement of the solubility of Na carboxylate **A-Na** in  
 3 *t*BuOMe. <sup>1</sup>H NMR spectra were obtained after evaporating *t*BuOMe and dissolving the  
 4 residue in DMSO-*d*<sub>6</sub> using 1,3,5-trimethoxybenzene as the internal standard. **b**, <sup>1</sup>H NMR  
 5 spectrum of Na carboxylate **A-Na** in DMSO-*d*<sub>6</sub> as the reference.

6

1

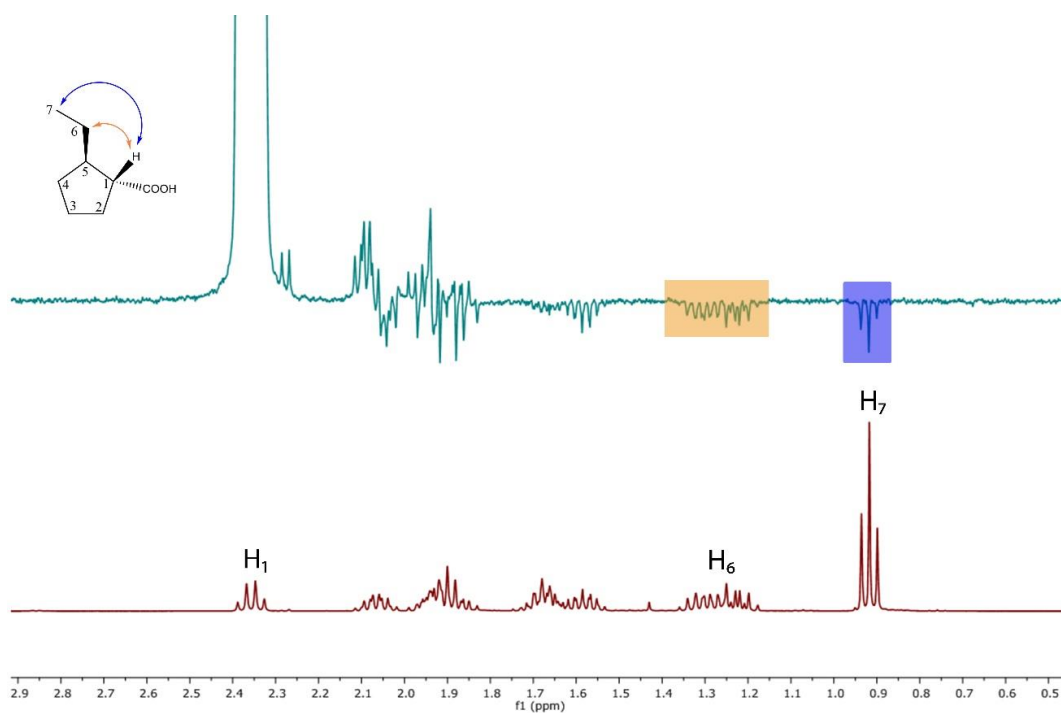

2

3 **Supplementary Figure 4.**  $^1\text{H}$  NMR and 1D NOE experiment of **6**. Selective irradiation on H<sub>1</sub>  
4 showed NOE with ethyl moiety (H<sub>6</sub> and H<sub>7</sub>, highlighted) which are positioned on the same  
5 side of the ring.

6

7

8

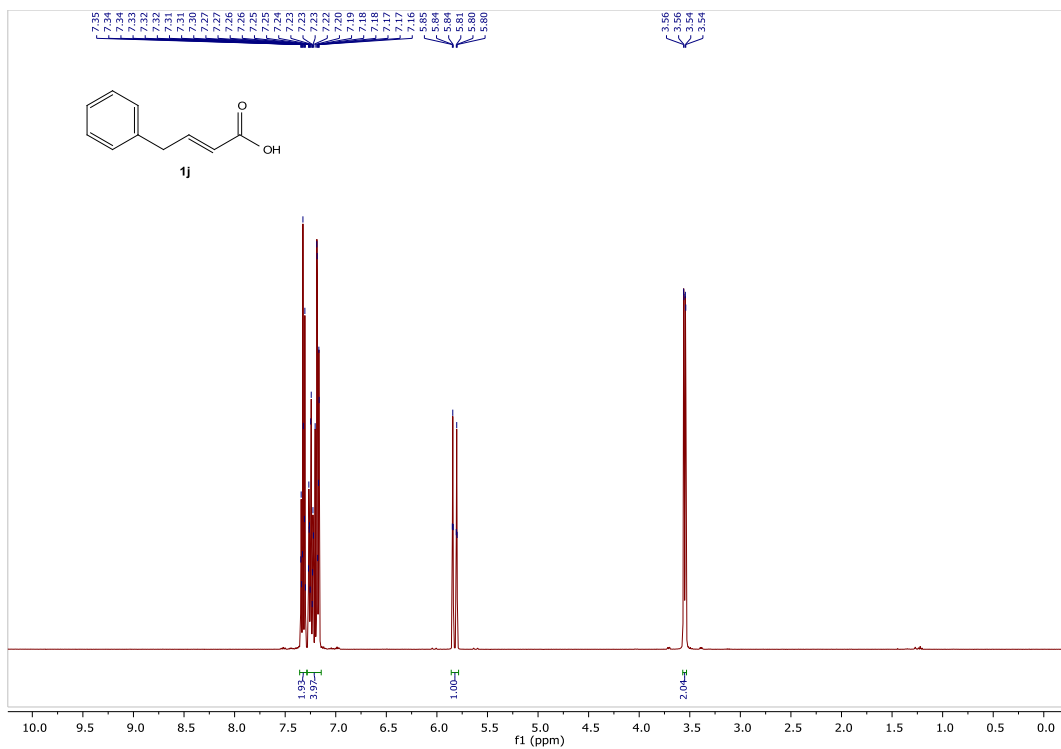

1

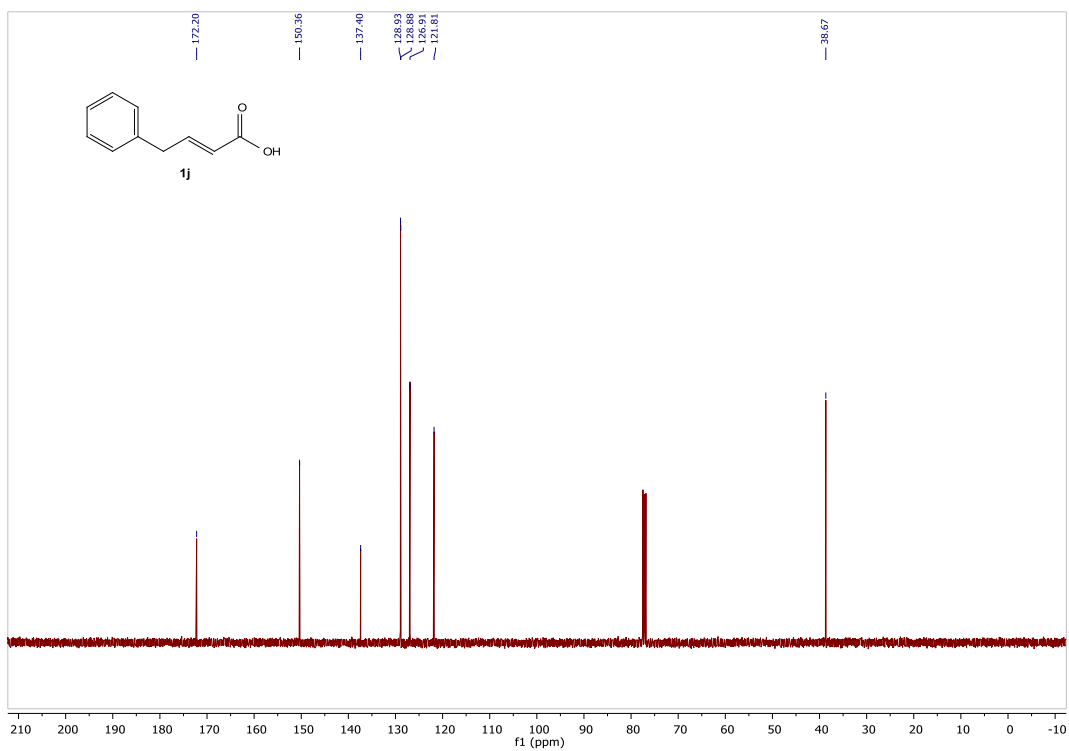

2

3 **Supplementary Figure 5. NMR spectra of (*E*)-4-phenylbut-2-enoic acid (**1j**)**

1

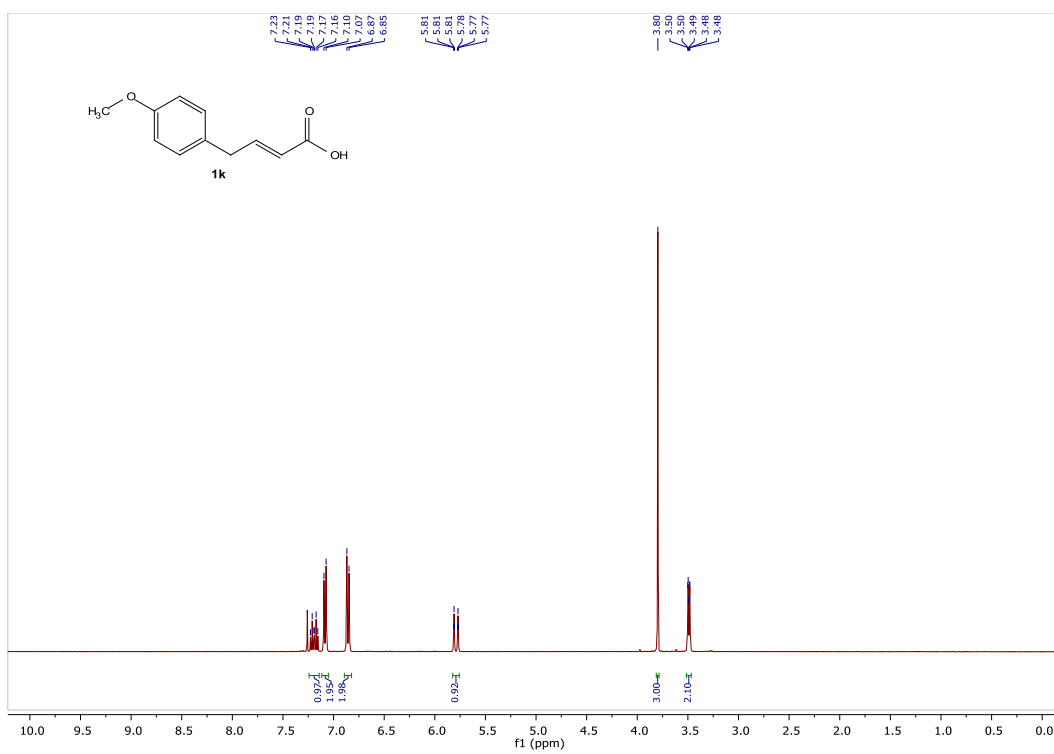

2

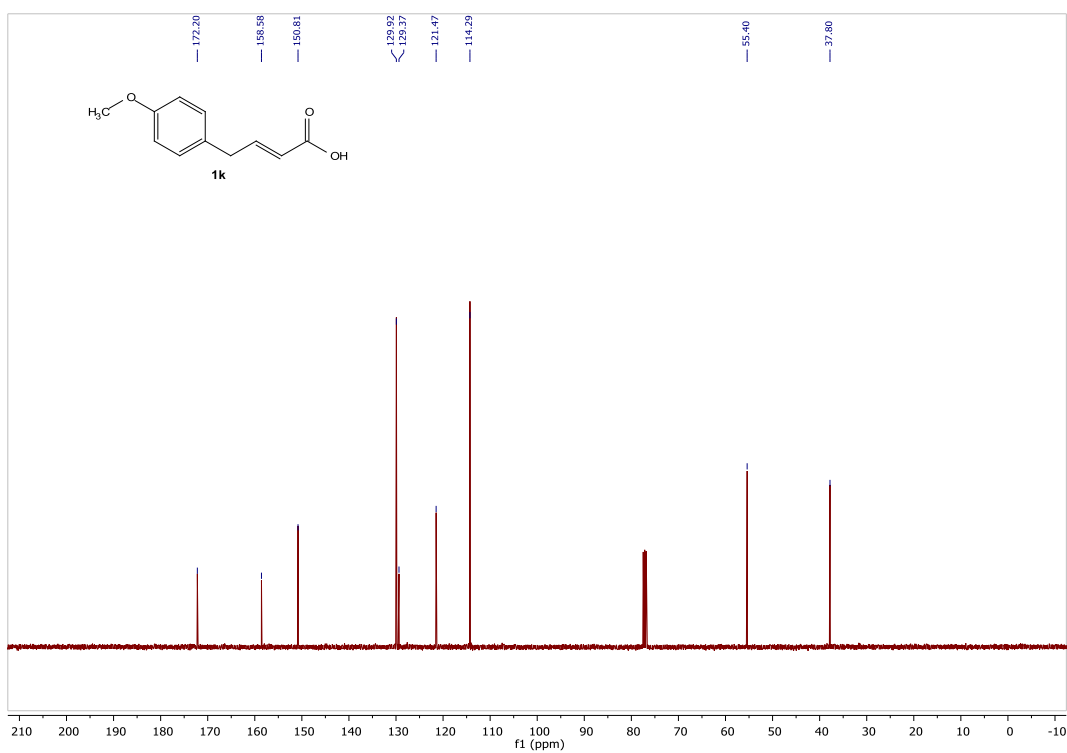

3 **Supplementary Figure 6. NMR spectra of (E)-4-(4-methoxyphenyl)but-2-enoic acid (1k)**

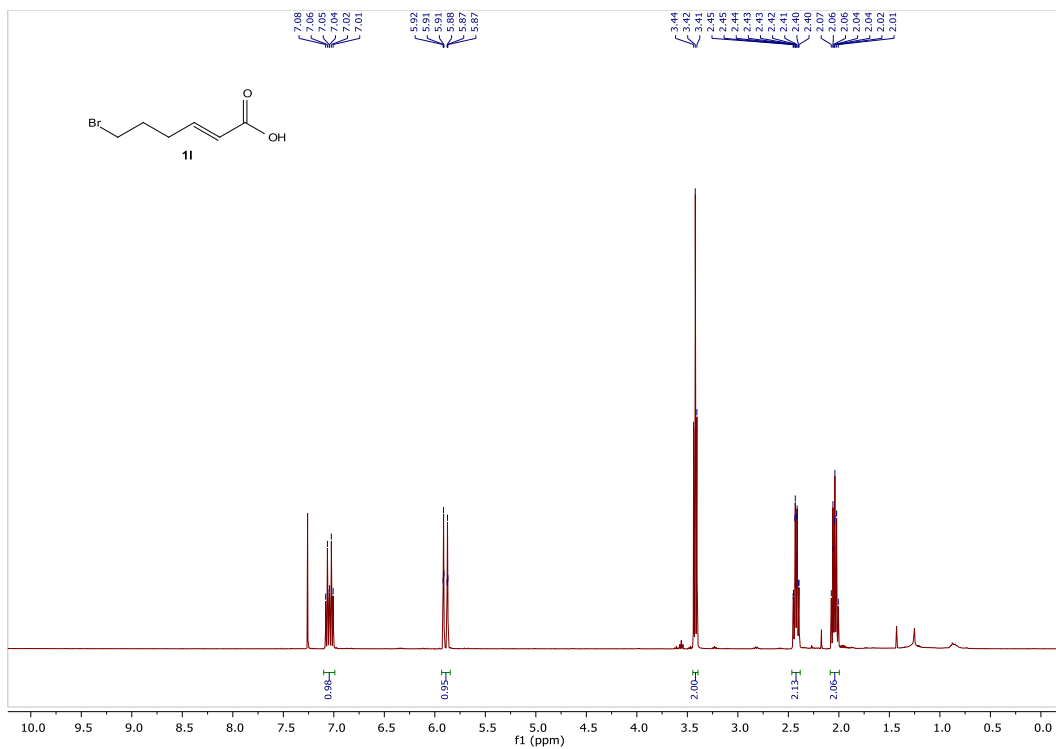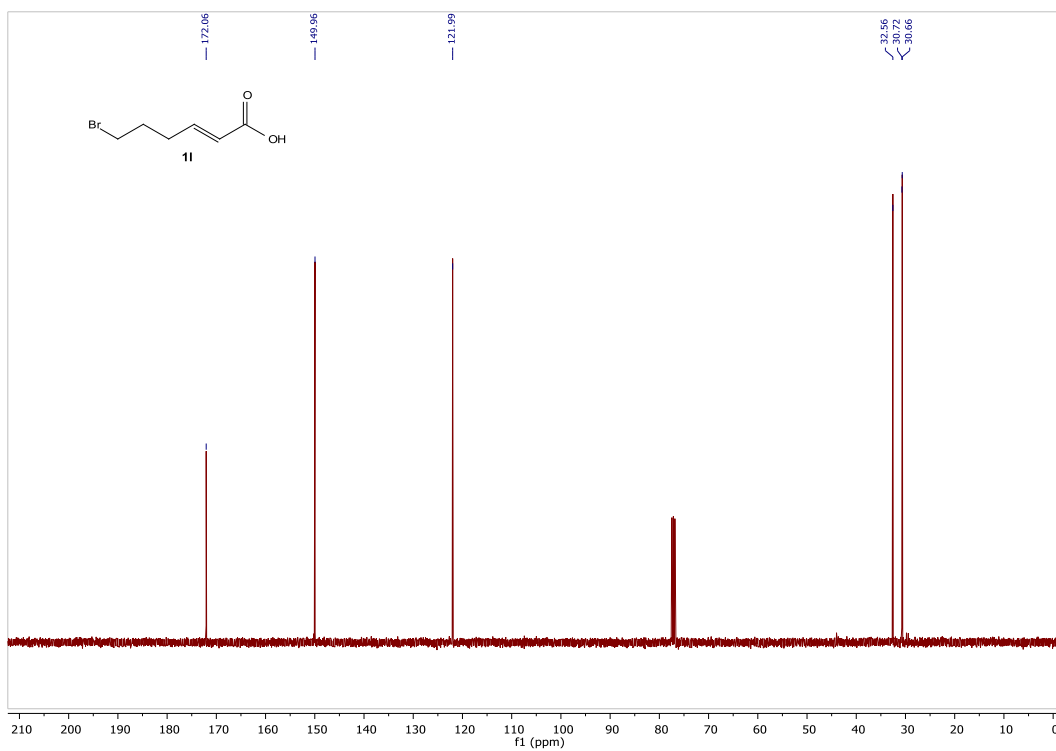

3 **Supplementary Figure 7. NMR spectra of (*E*)-6-bromo-hex-2-enoic acid (**11**)**

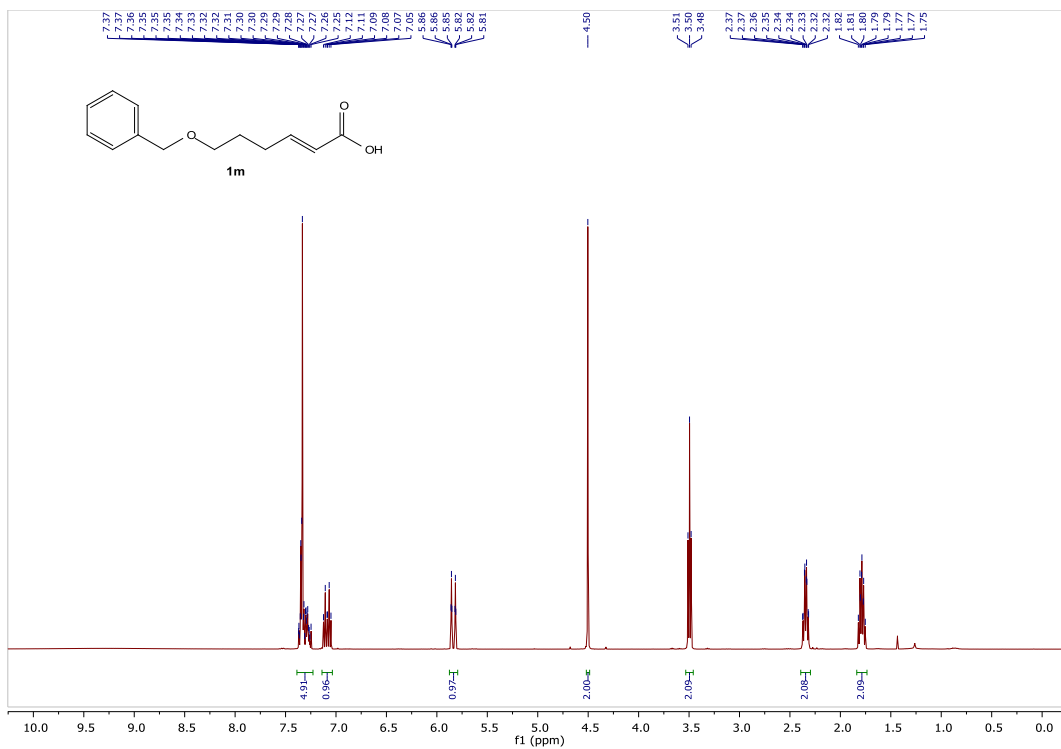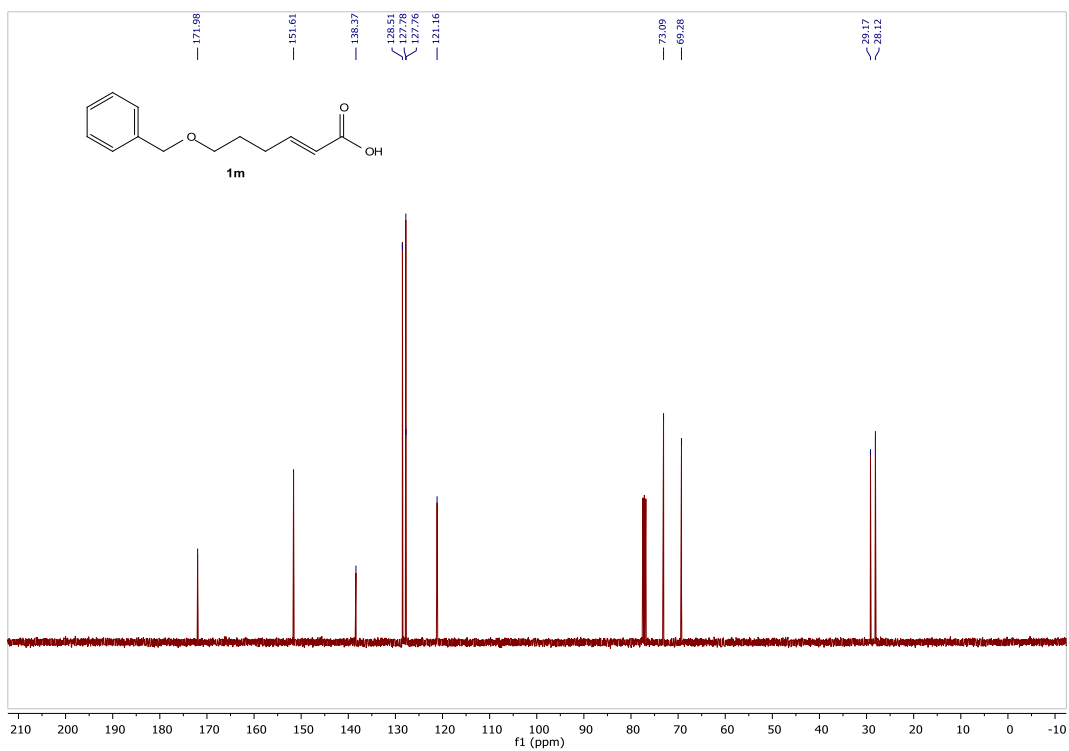

3 **Supplementary Figure 8. NMR spectra of (*E*)-6-(benzyloxy)hex-2-enoic acid (1m)**



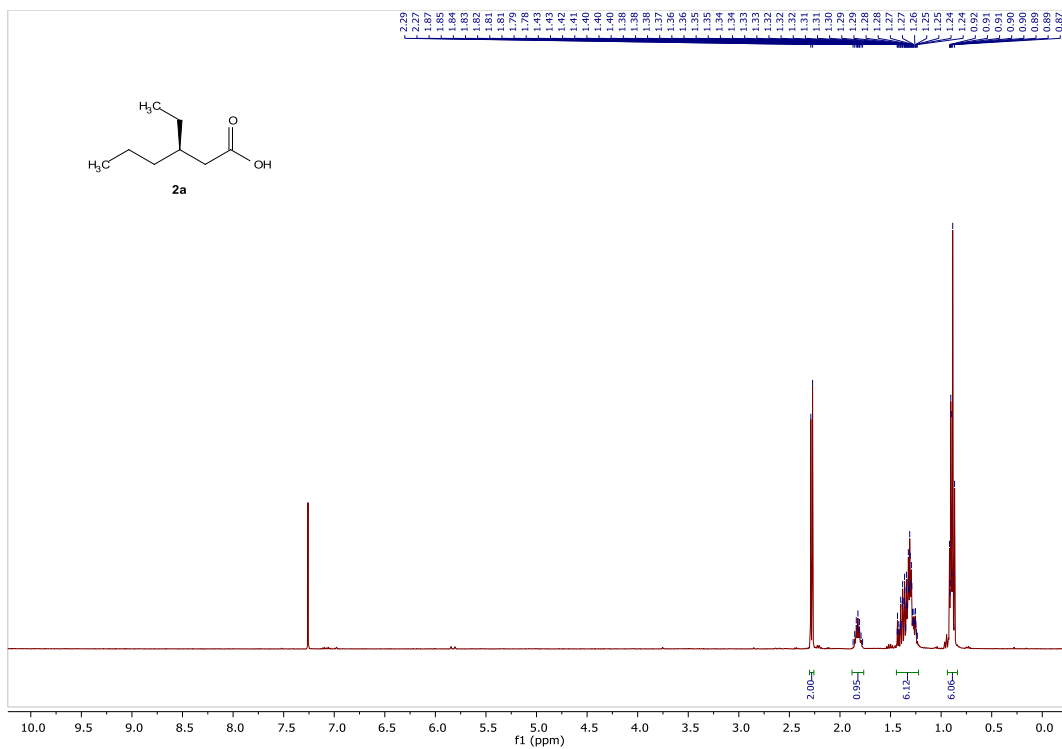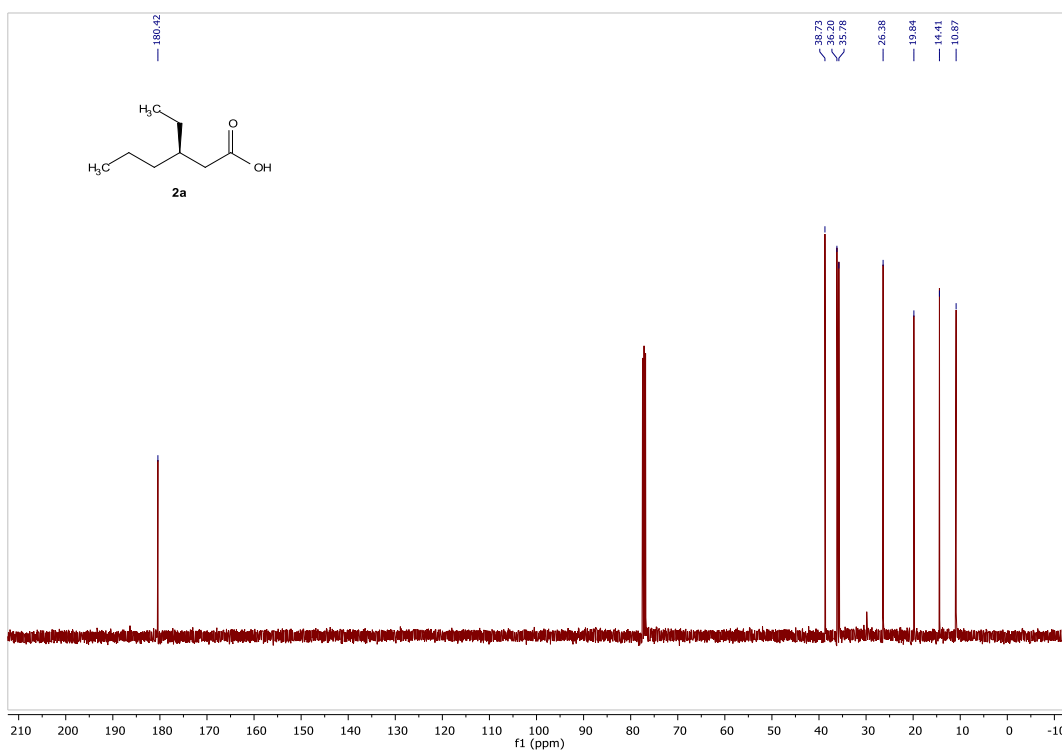

3 **Supplementary Figure 9. NMR spectra of (*R*)-3-ethylhexanoic acid (2a)**

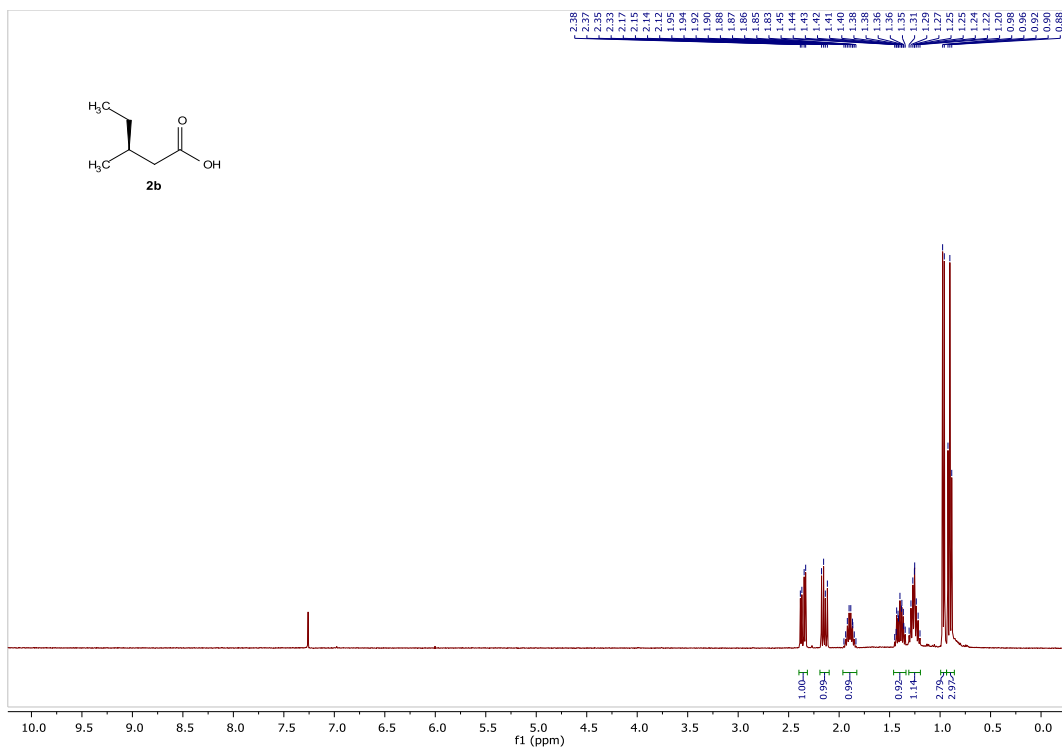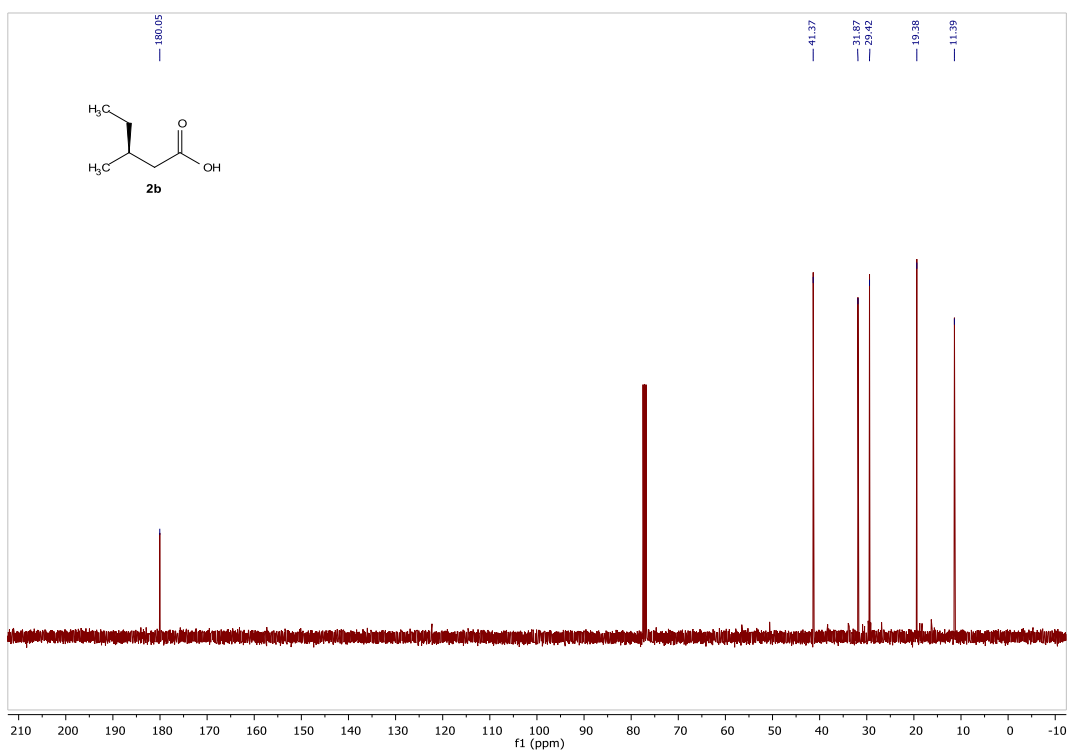

3 **Supplementary Figure 10. NMR spectra of (*S*)-3-methylpentanoic acid (**2b**)**

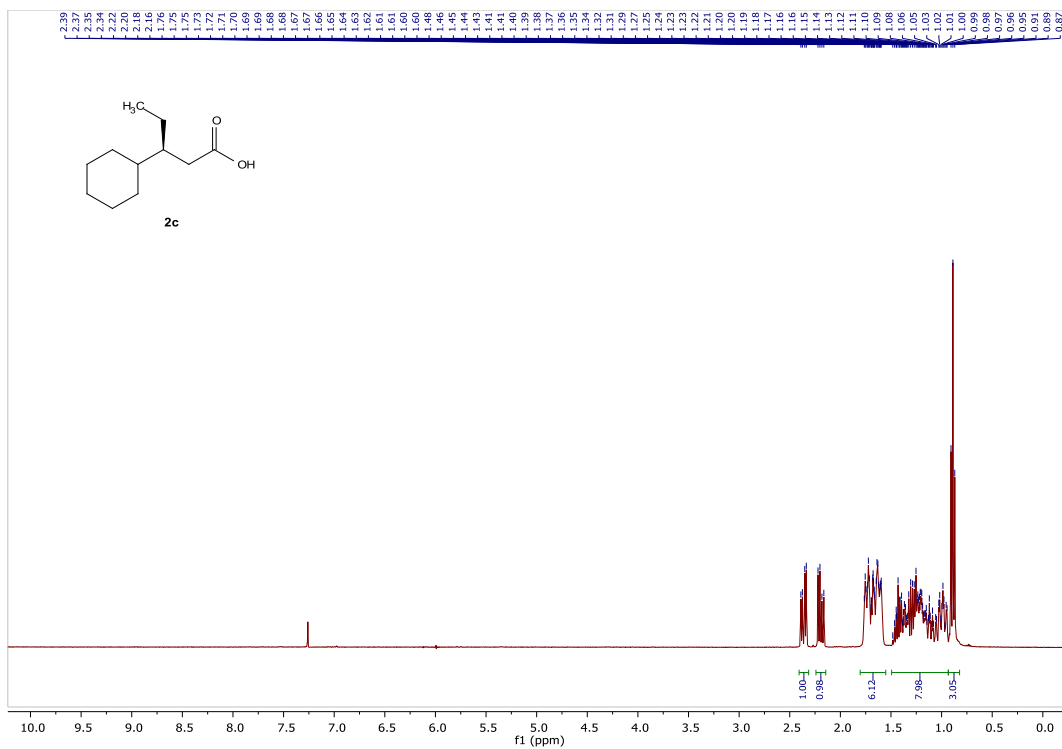

1

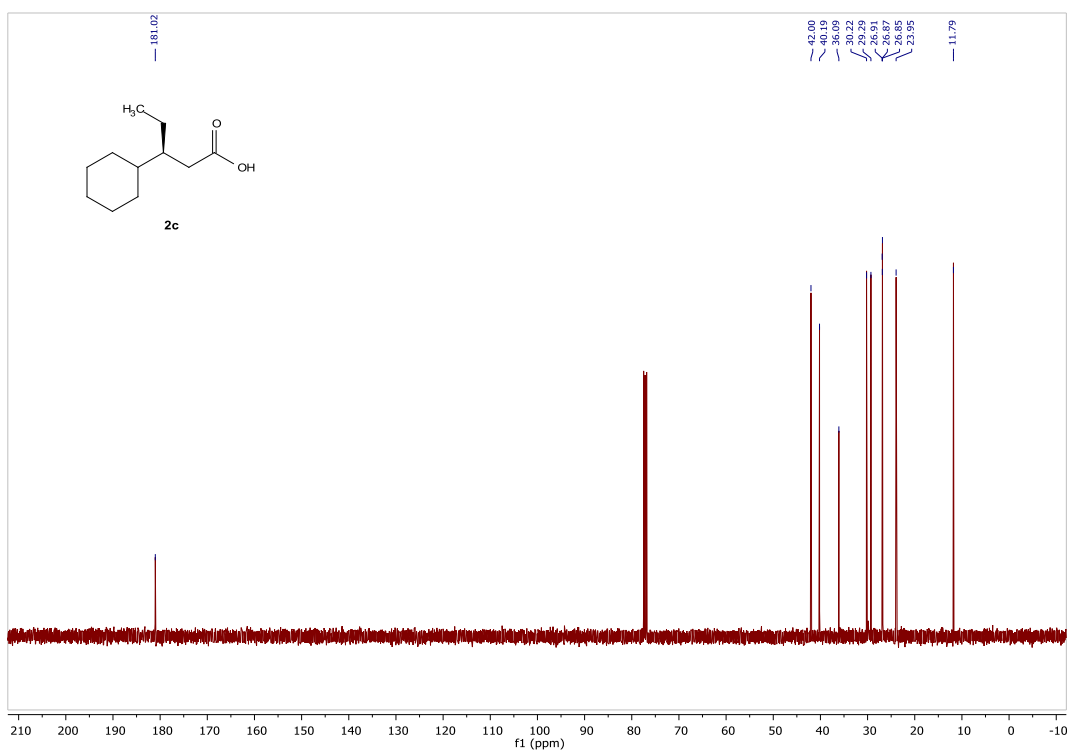

2

3 **Supplementary Figure 11. NMR spectra of (*S*)-3-cyclohexylpentanoic acid (**2c**)**

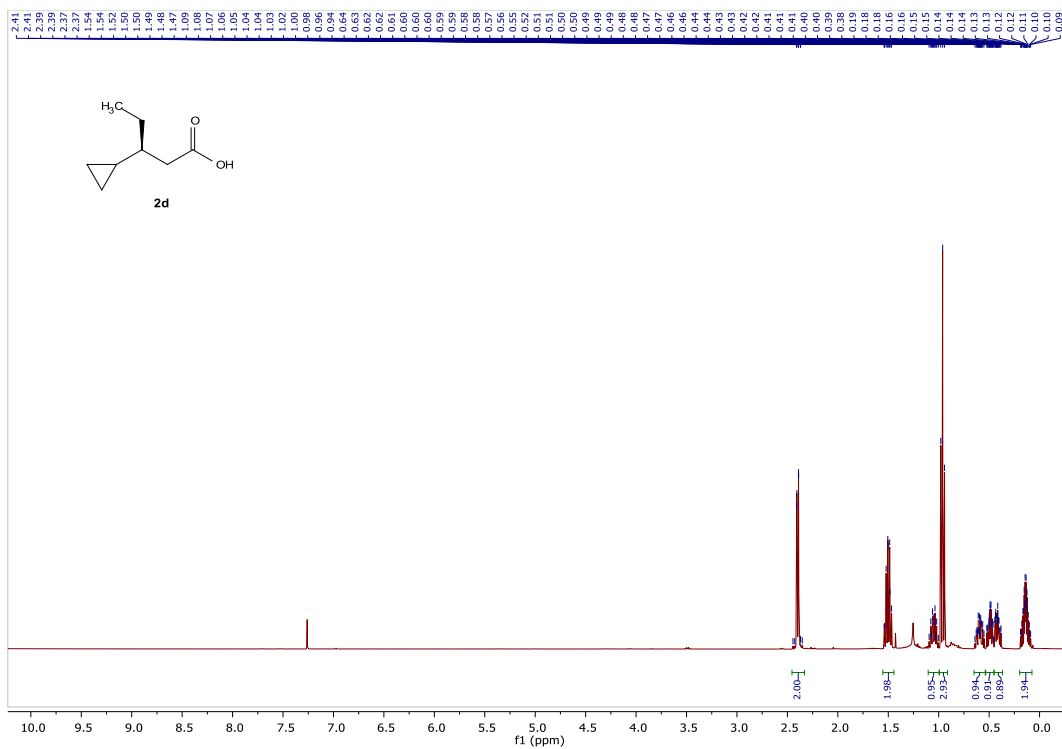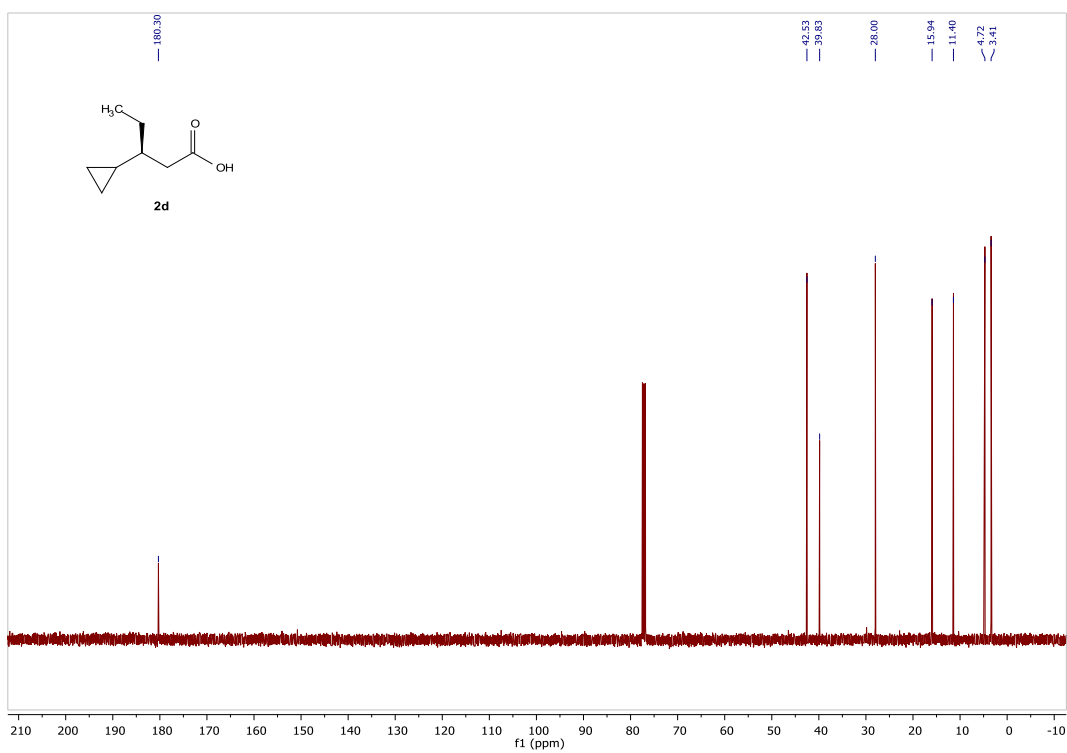

3 **Supplementary Figure 12. NMR spectra of (*S*)-3-cyclopropylpentanoic acid (**2d**)**

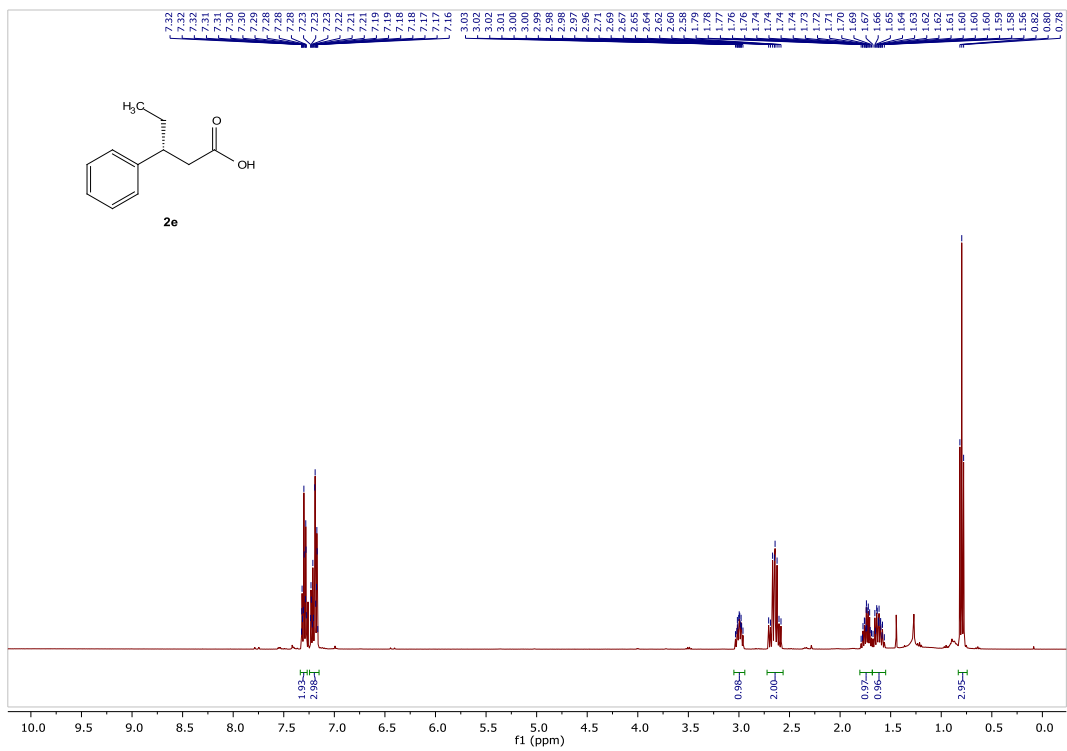

1

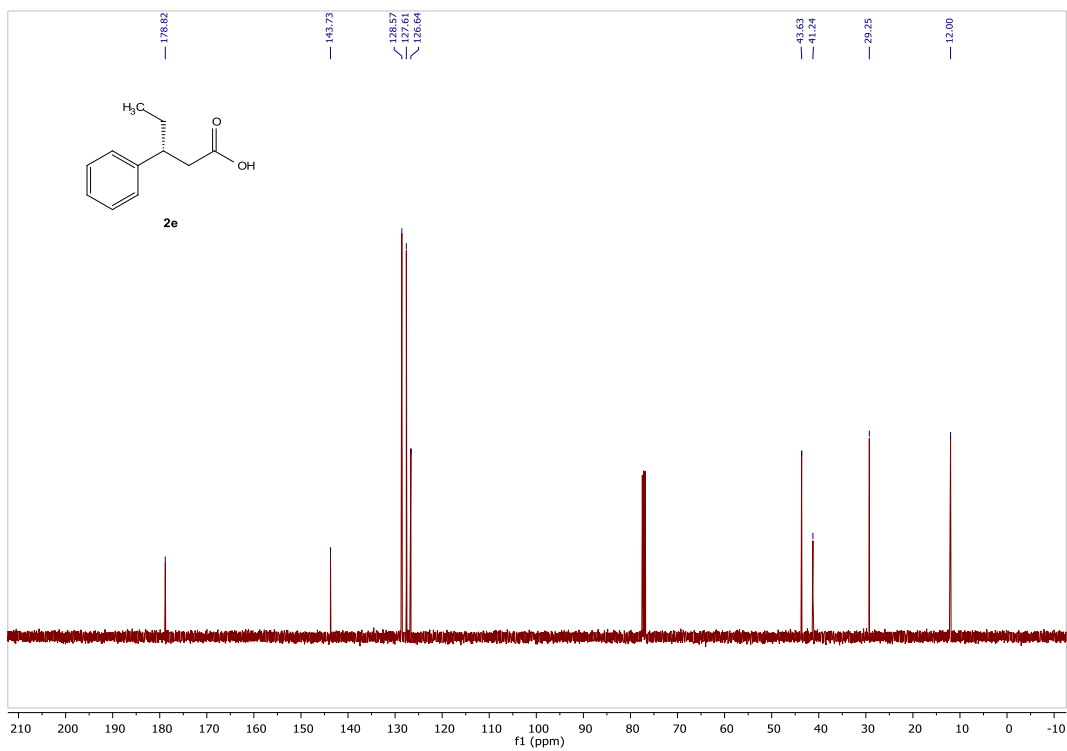

2

3 Supplementary Figure 13. NMR spectra of (*R*)-3-phenylpentanoic acid (**2e**)

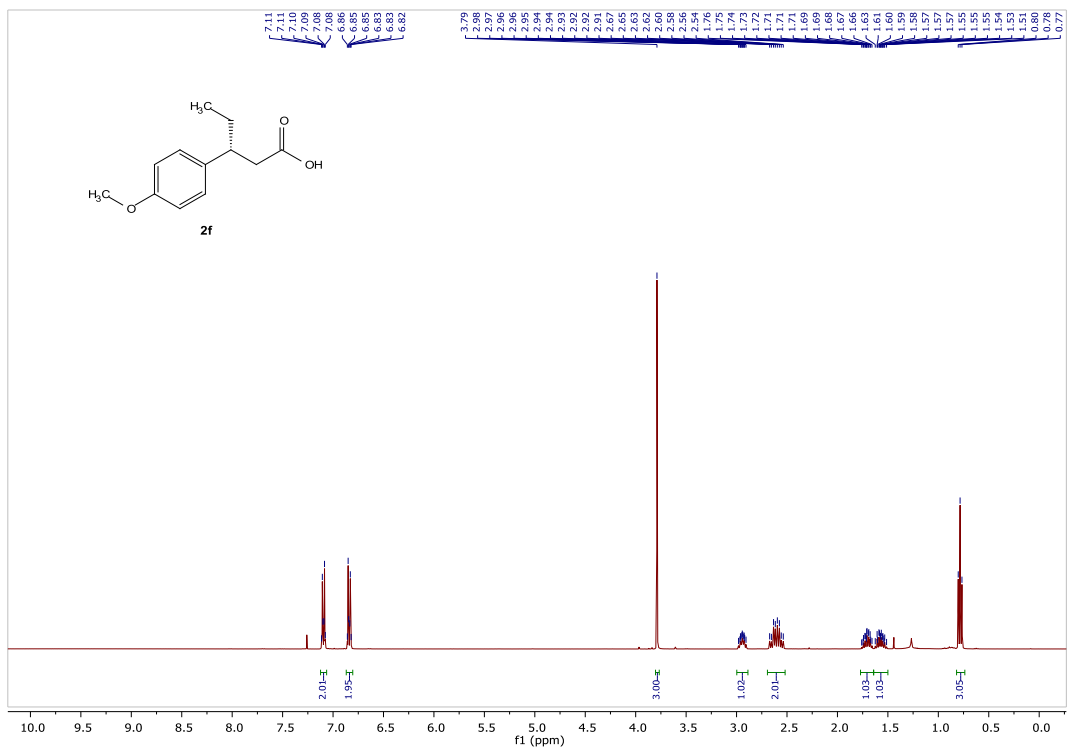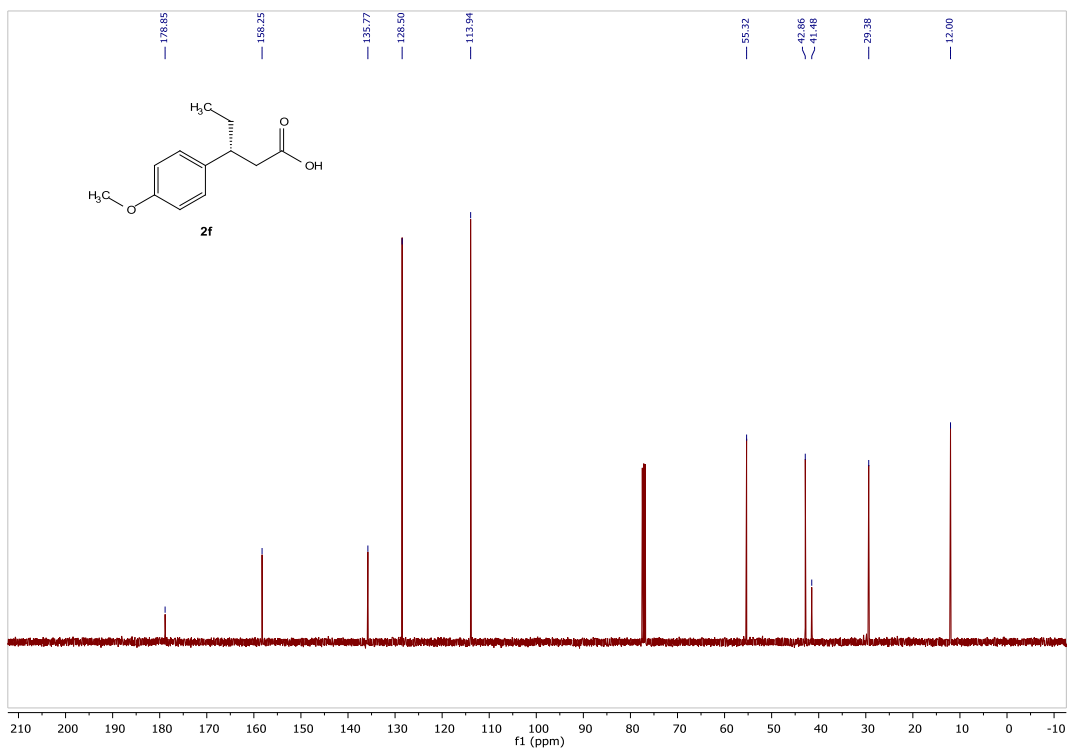

3 **Supplementary Figure 14. NMR spectra of (*R*)-3-(4-methoxyphenyl)pentanoic acid (**2f**)**

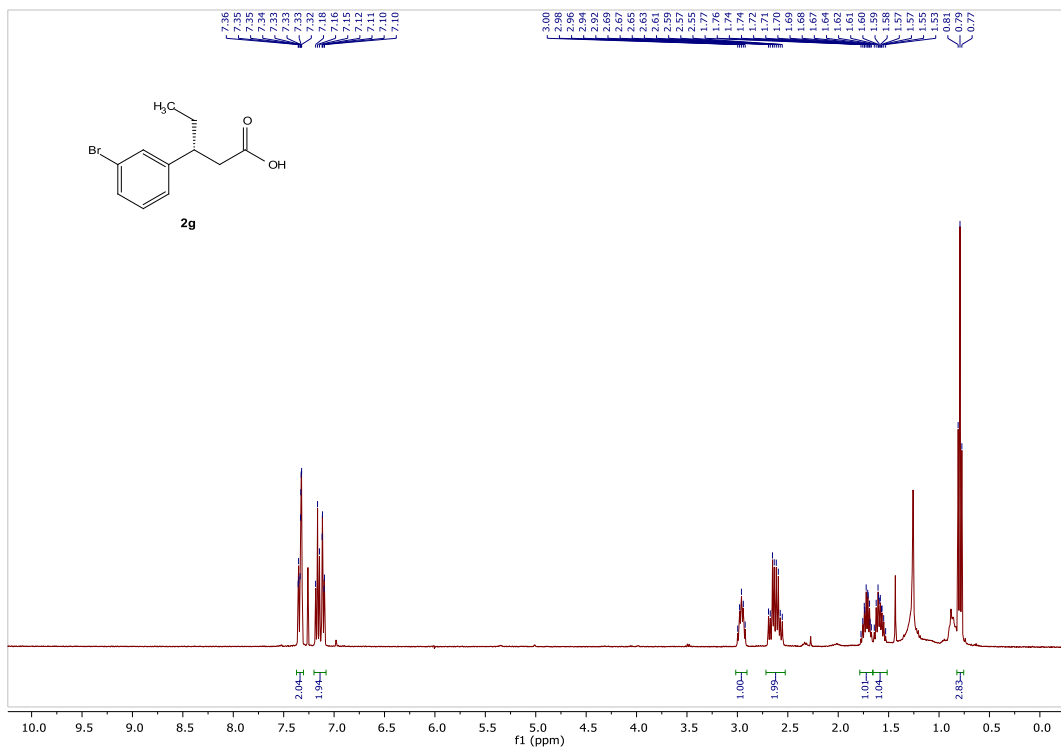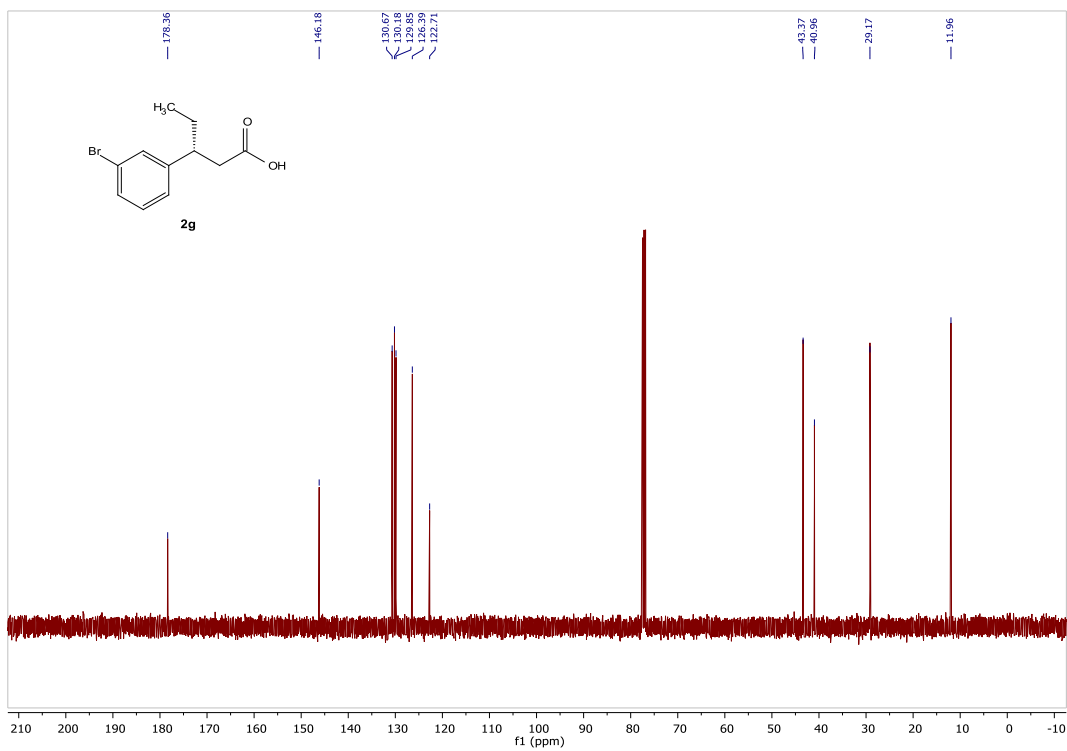

3 Supplementary Figure 15. NMR spectra of (*R*)-3-(3-bromophenyl)pentanoic acid (**2g**)

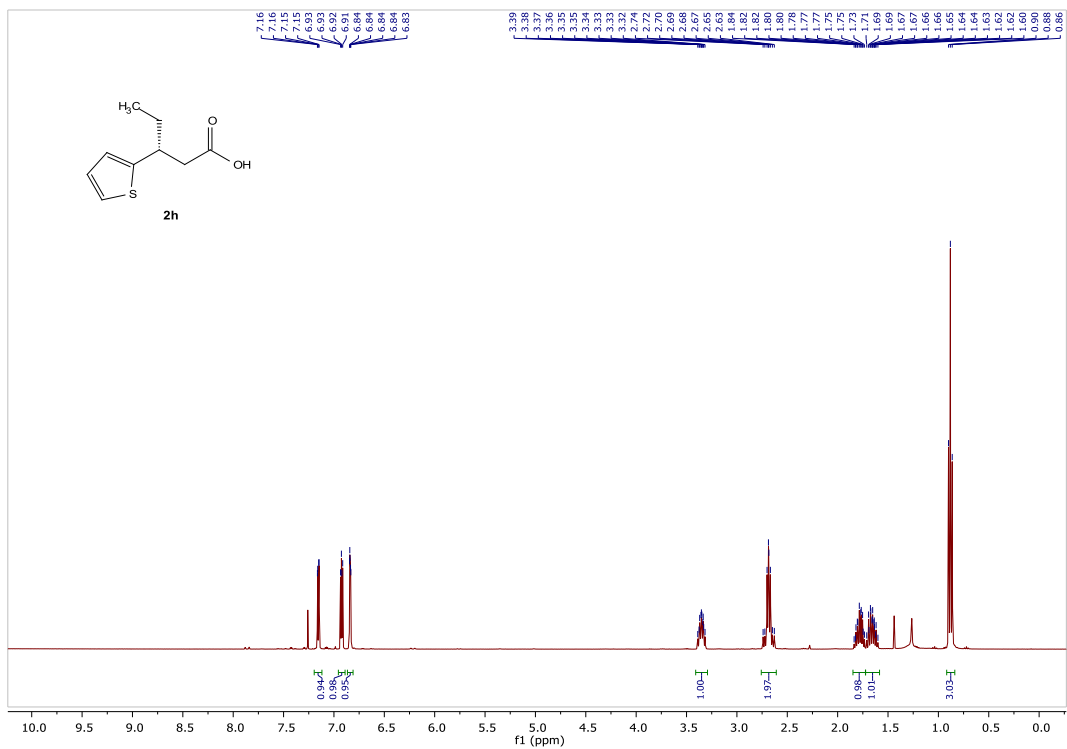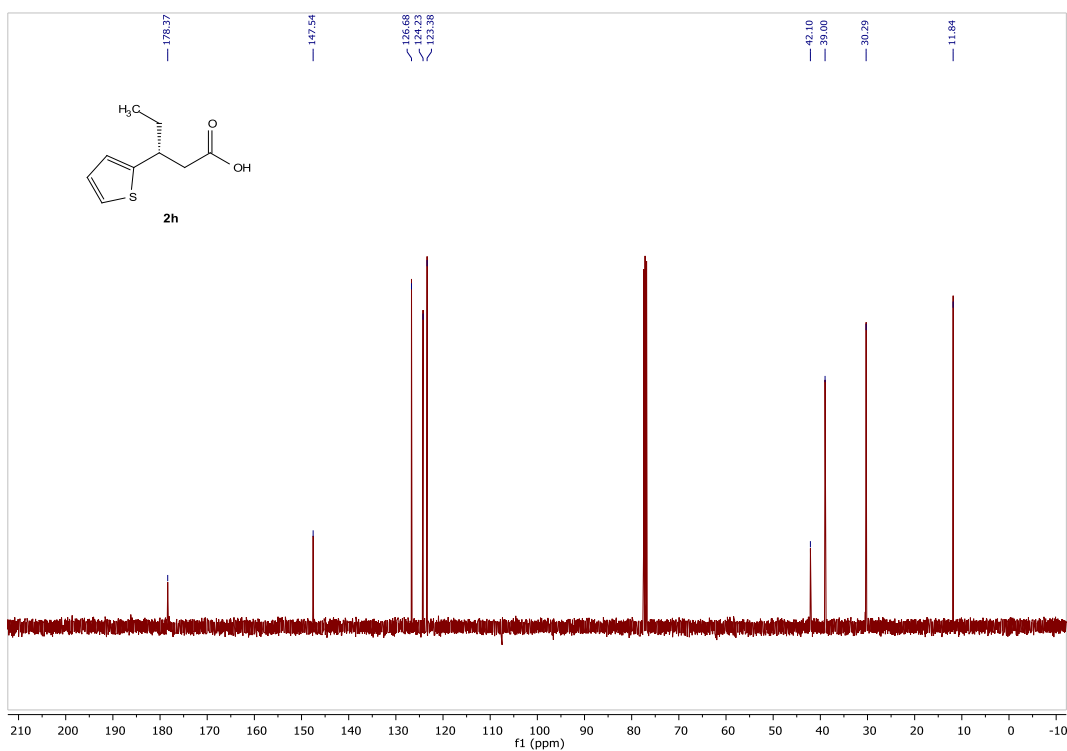

3 **Supplementary Figure 16. NMR spectra of (R)-3-(thiophen-2-yl)pentanoic acid (2h)**



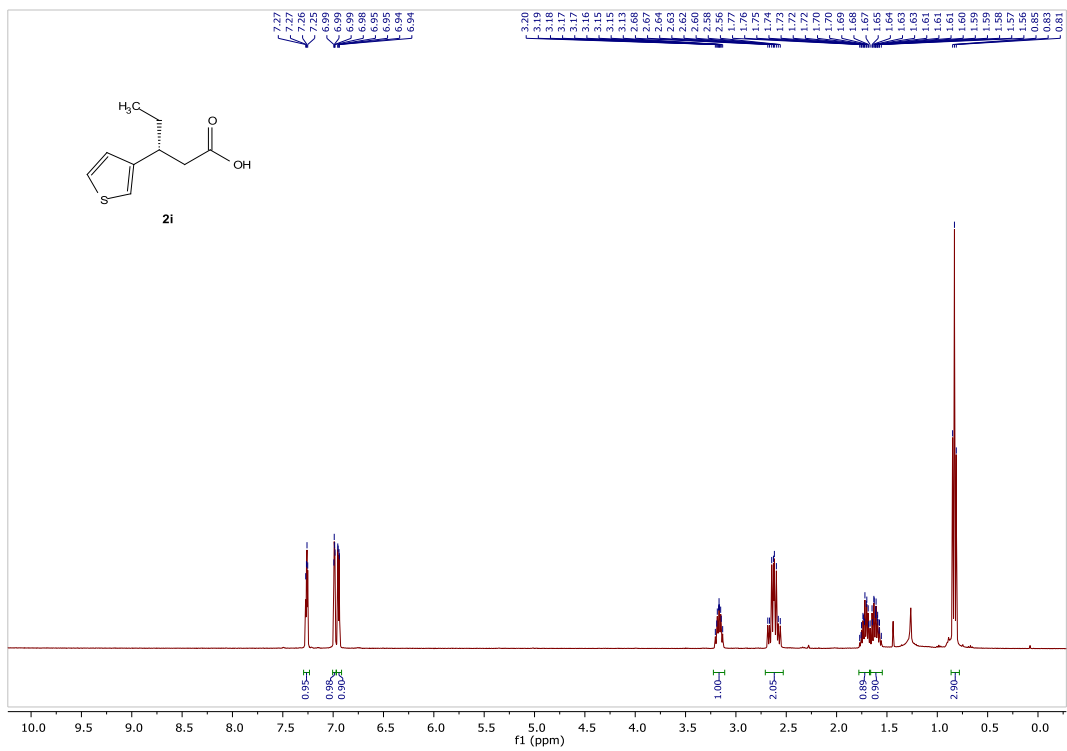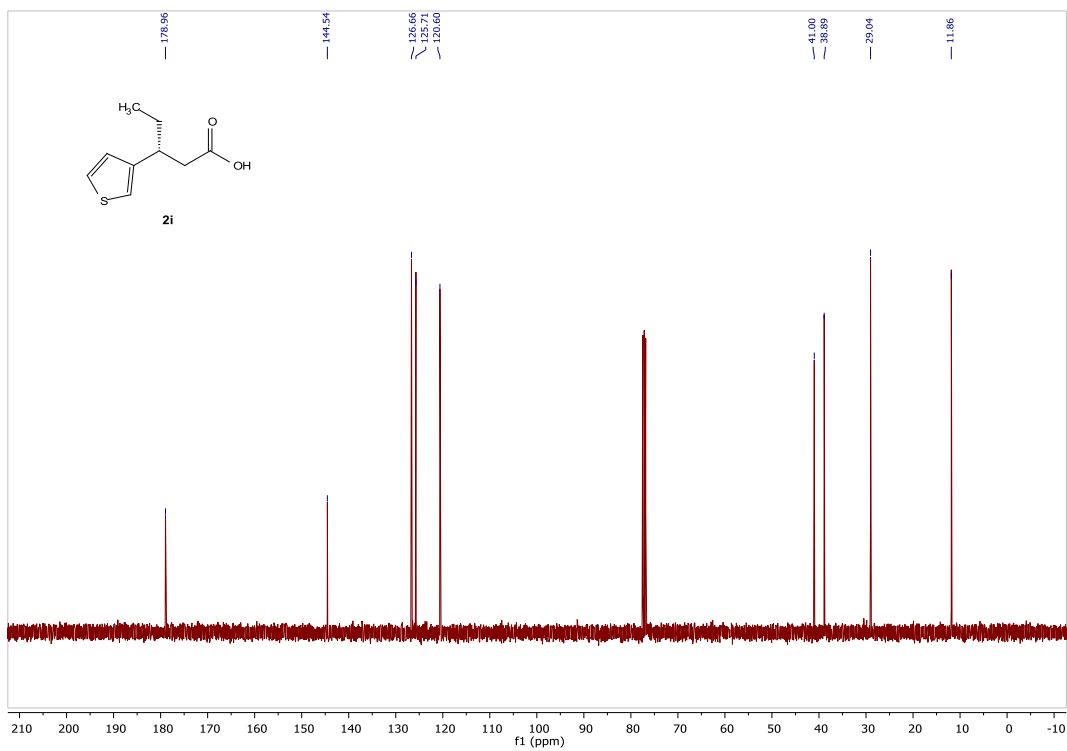

3 **Supplementary Figure 17. NMR spectra of (*R*)-3-(thiophen-3-yl)pentanoic acid (**2i**)**

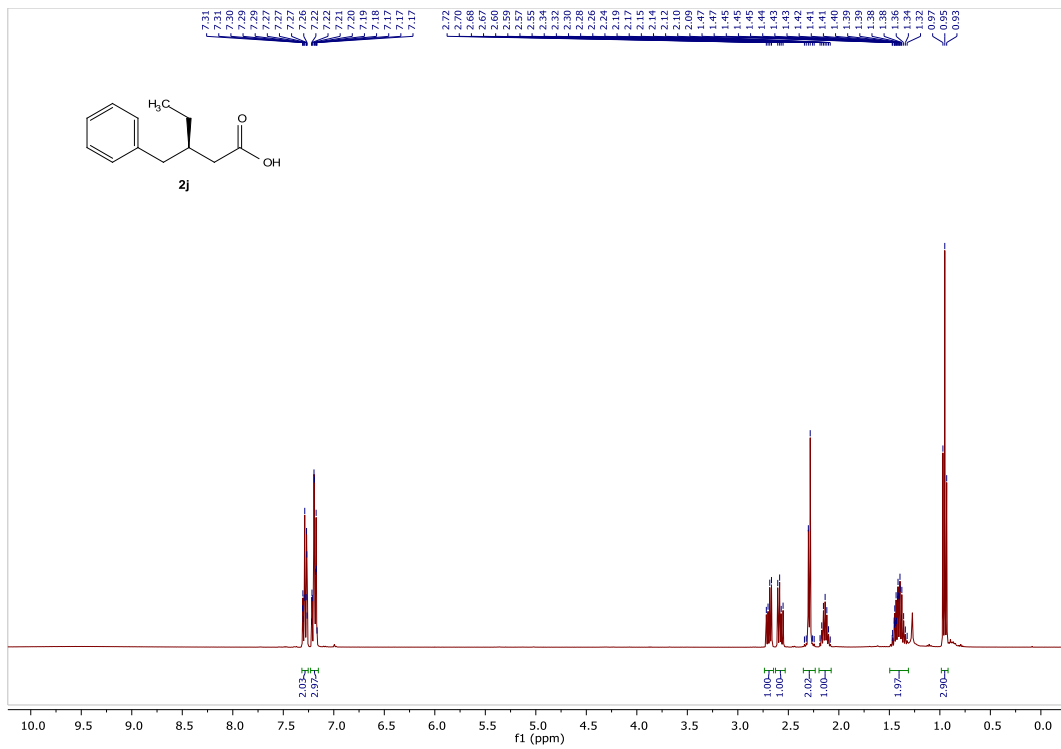

1

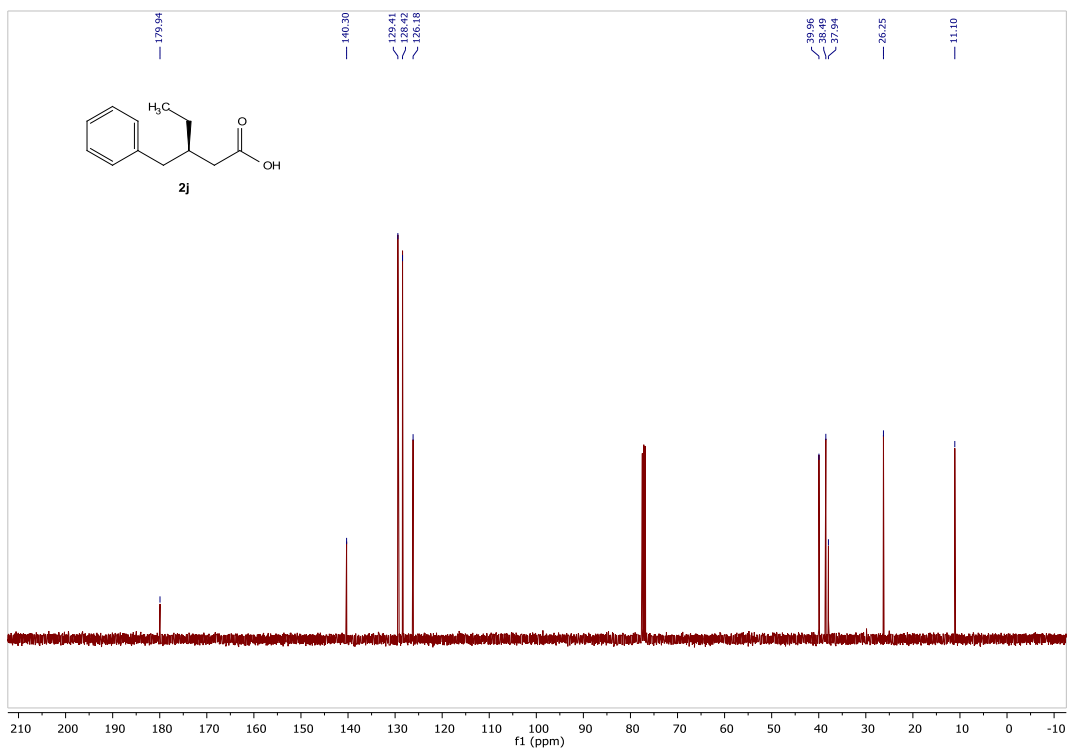

2

3 **Supplementary Figure 18. NMR spectra of (*R*)-3-benzylpentanoic acid (**2j**)**

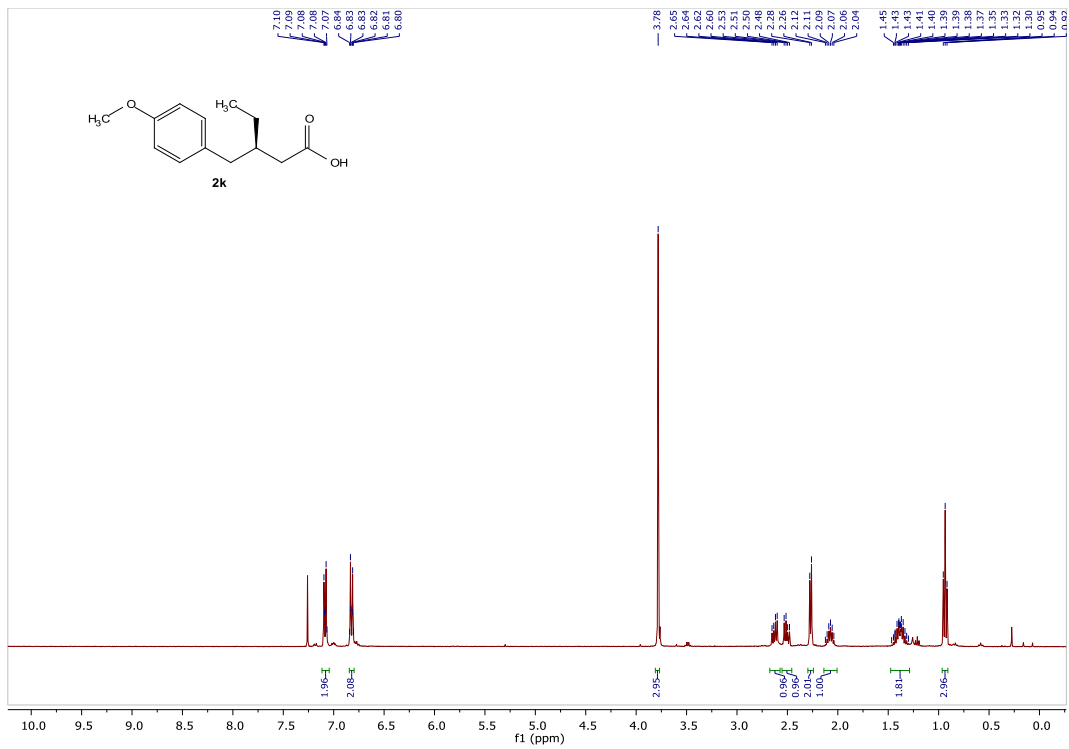

1

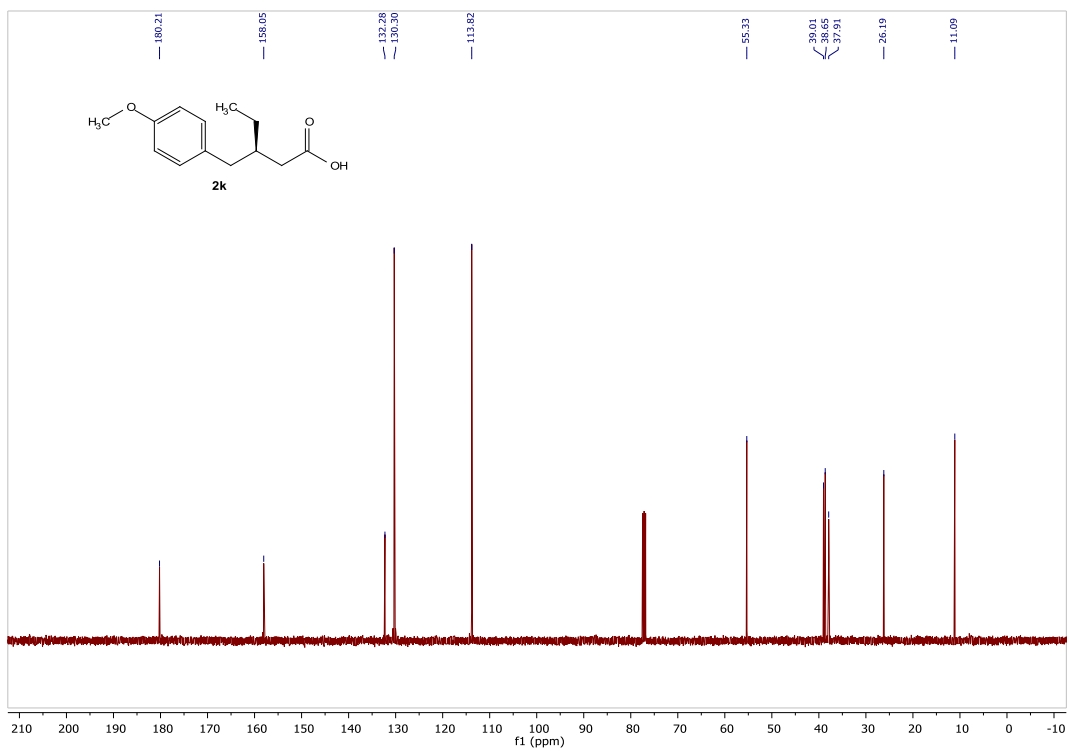

2

3 **Supplementary Figure 19. NMR spectra of (*R*)-3-(4-methoxybenzyl)pentanoic acid (2k)**

4

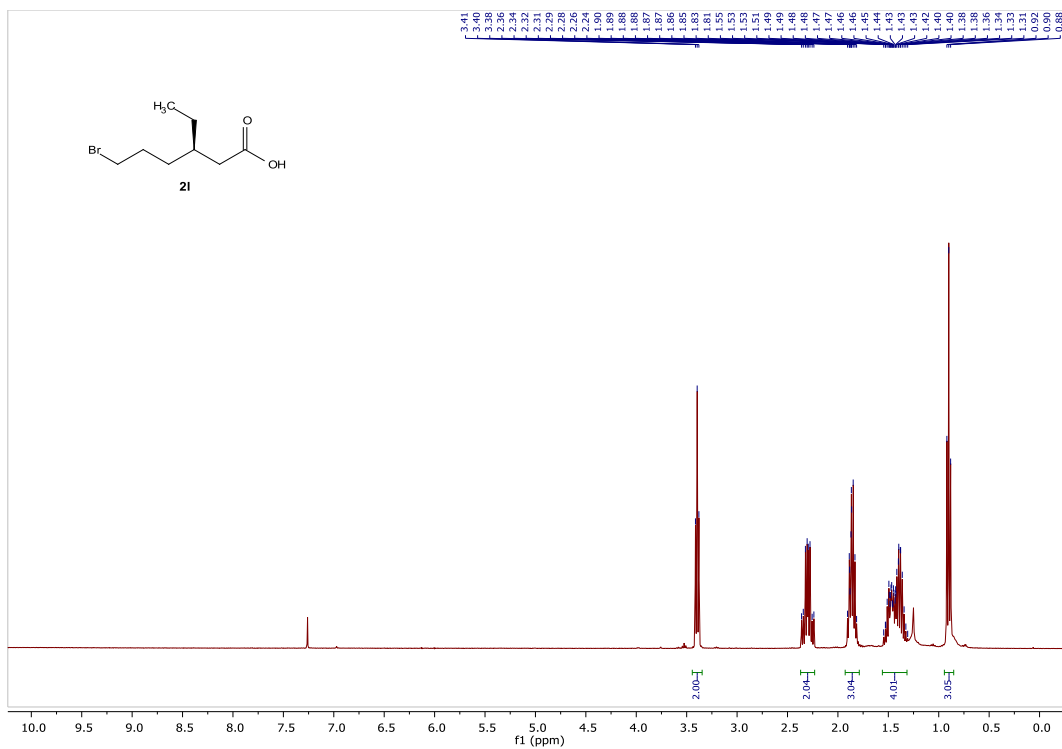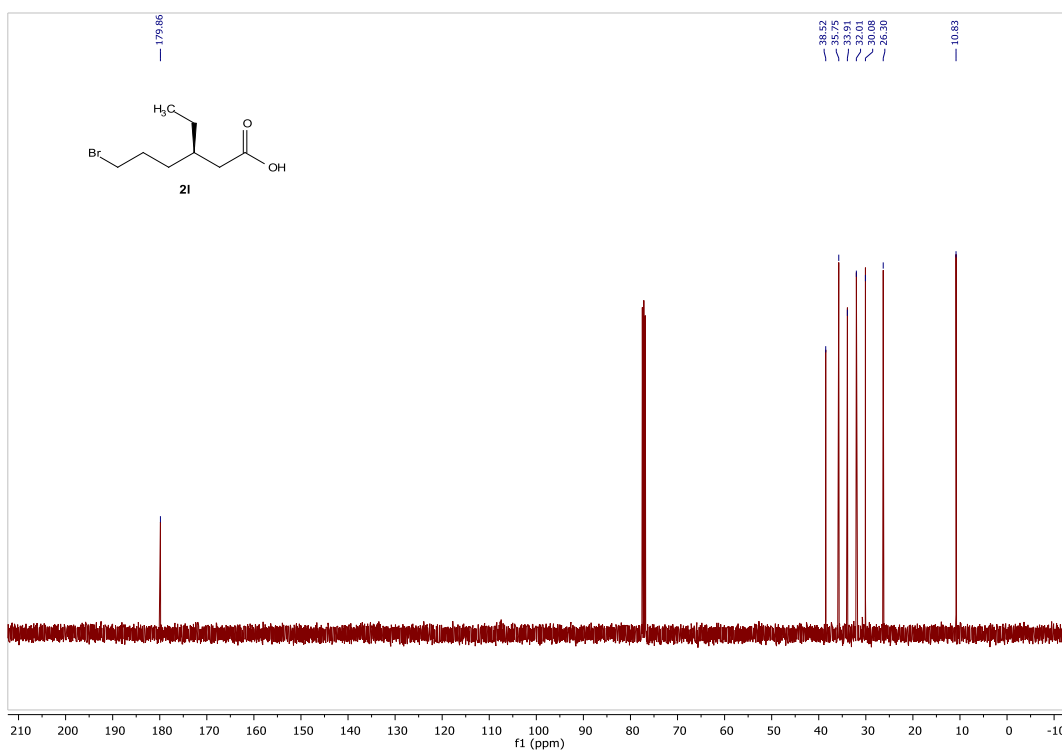

3 **Supplementary Figure 20. NMR spectra of (*R*)-6-bromo-3-ethylhexanoic acid (2I)**

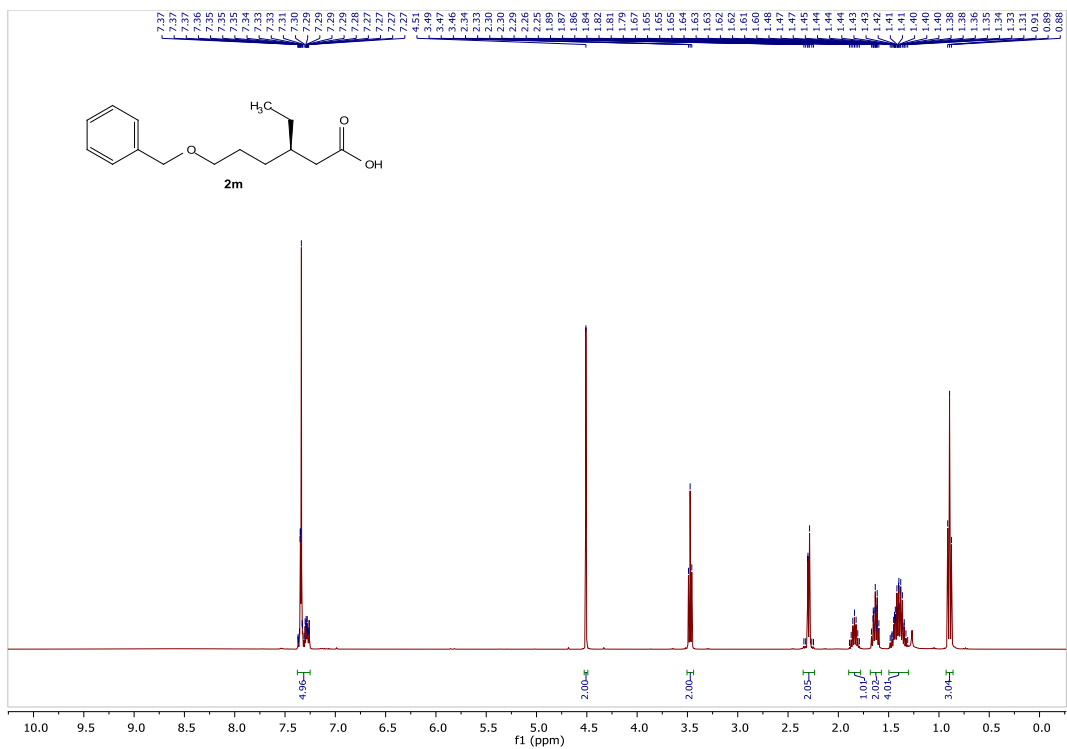

1

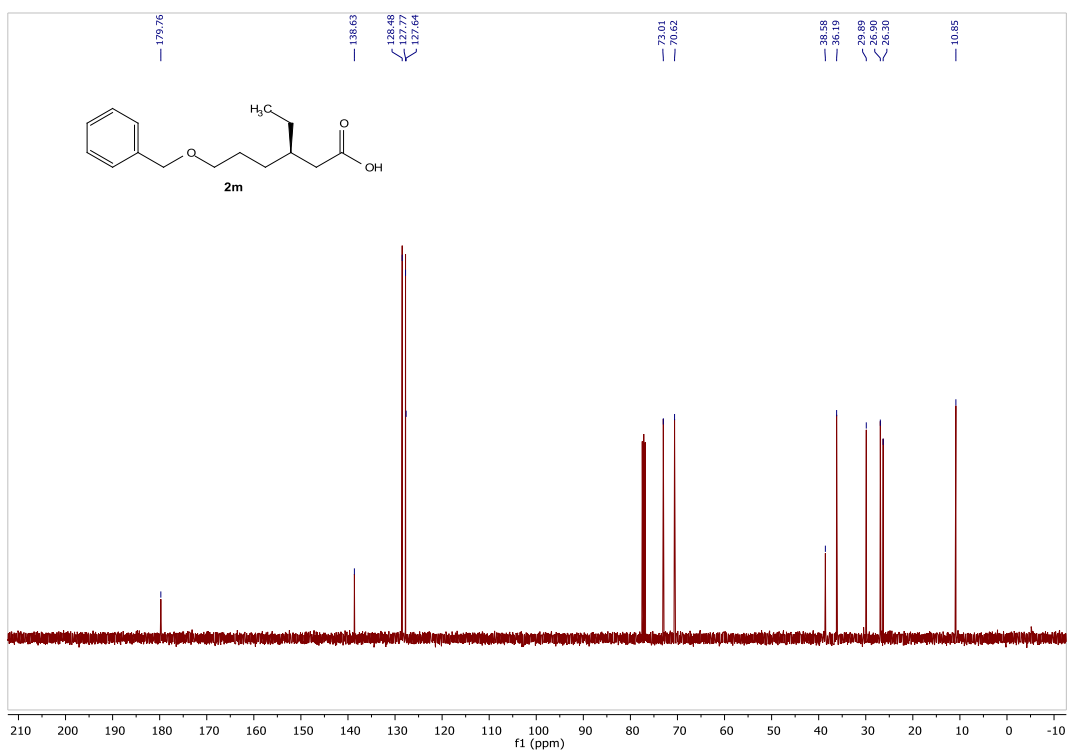

2

3 Supplementary Figure 21. NMR spectra of (*R*)-6-benzyloxy-3-ethylhexanoic acid (**2m**)

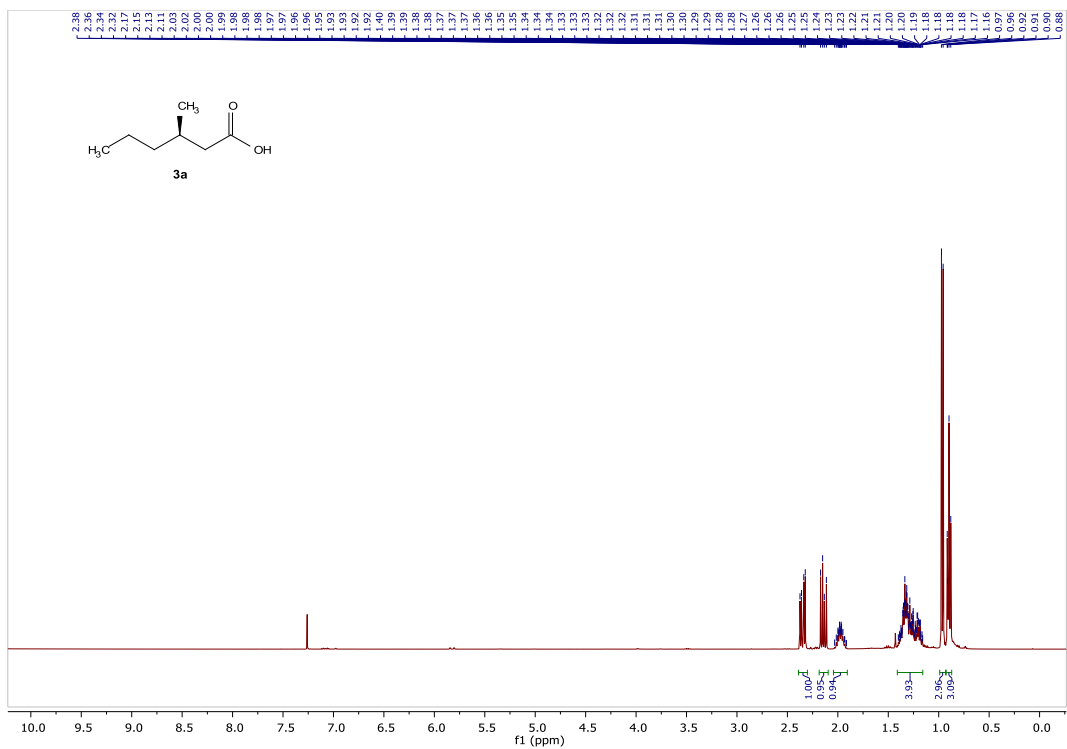

1

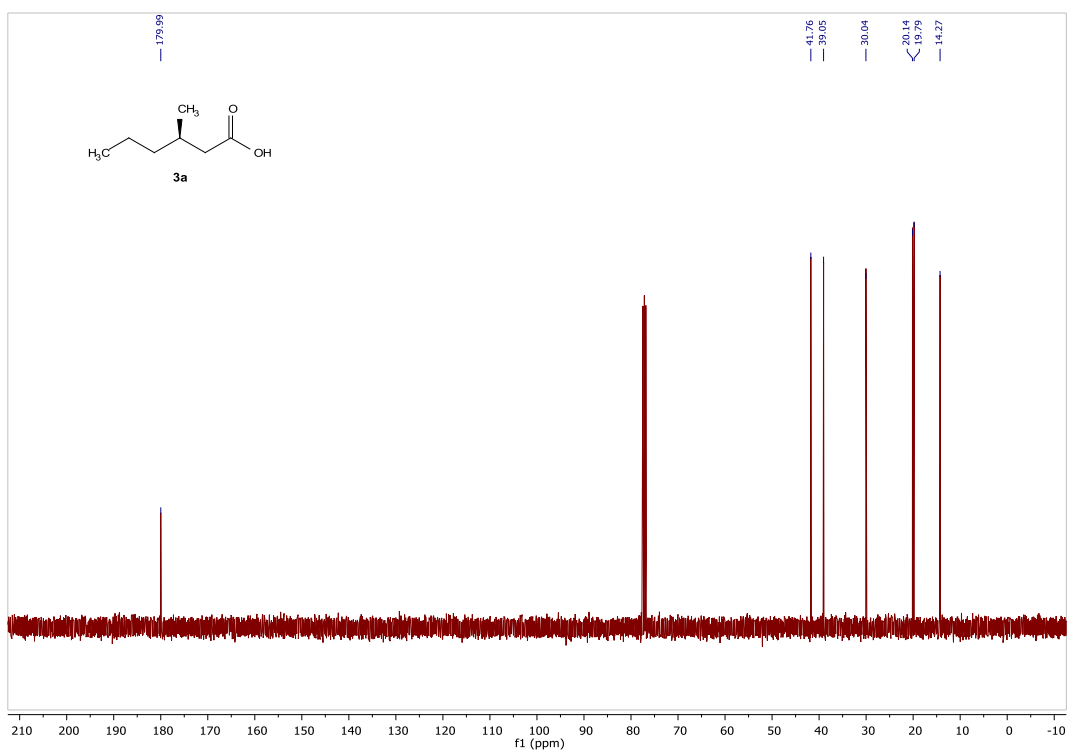

2

3 Supplementary Figure 22. NMR spectra of (R)-3-methylhexanoic acid (3a)

4

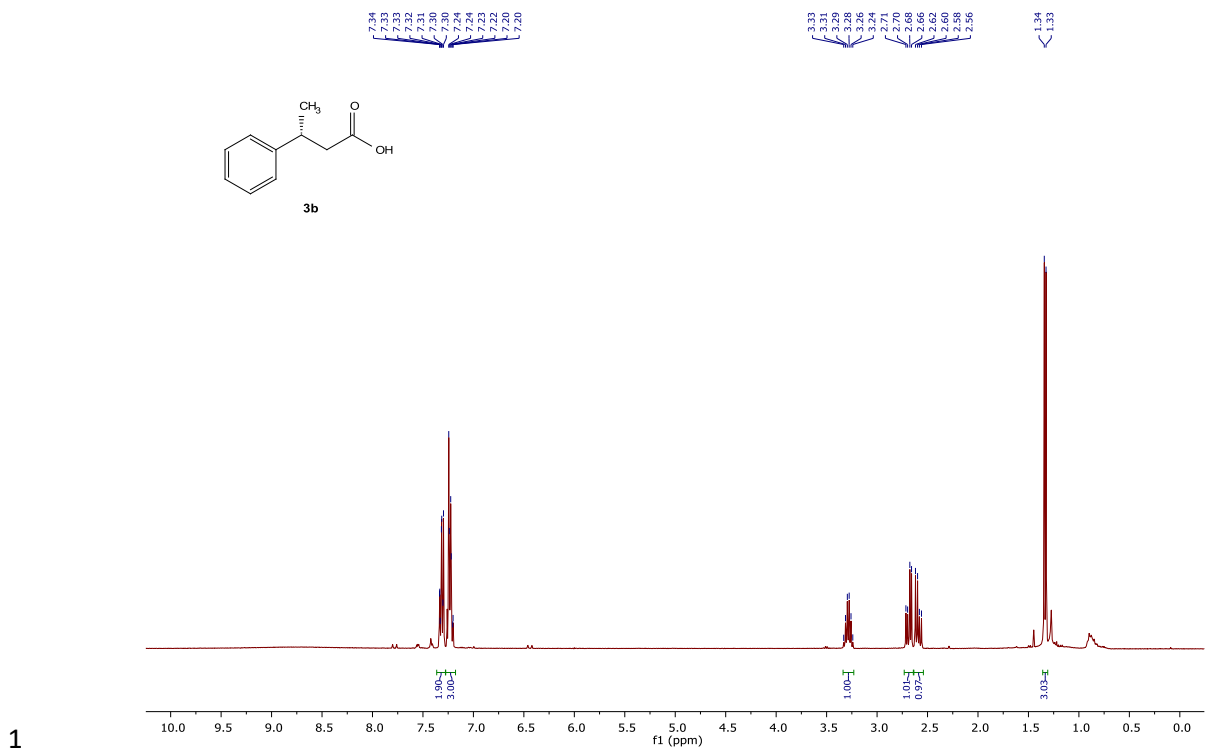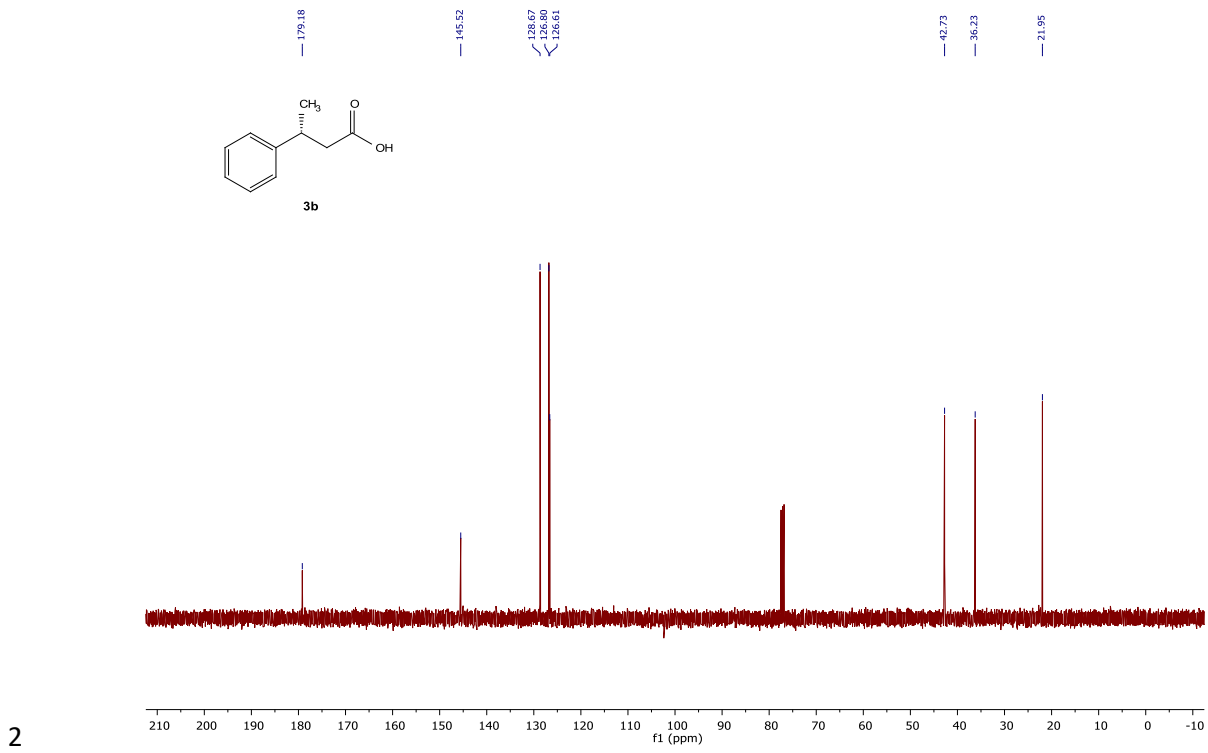

3 **Supplementary Figure 23. NMR spectra of (R)-3-phenylbutanoic acid (3b)**

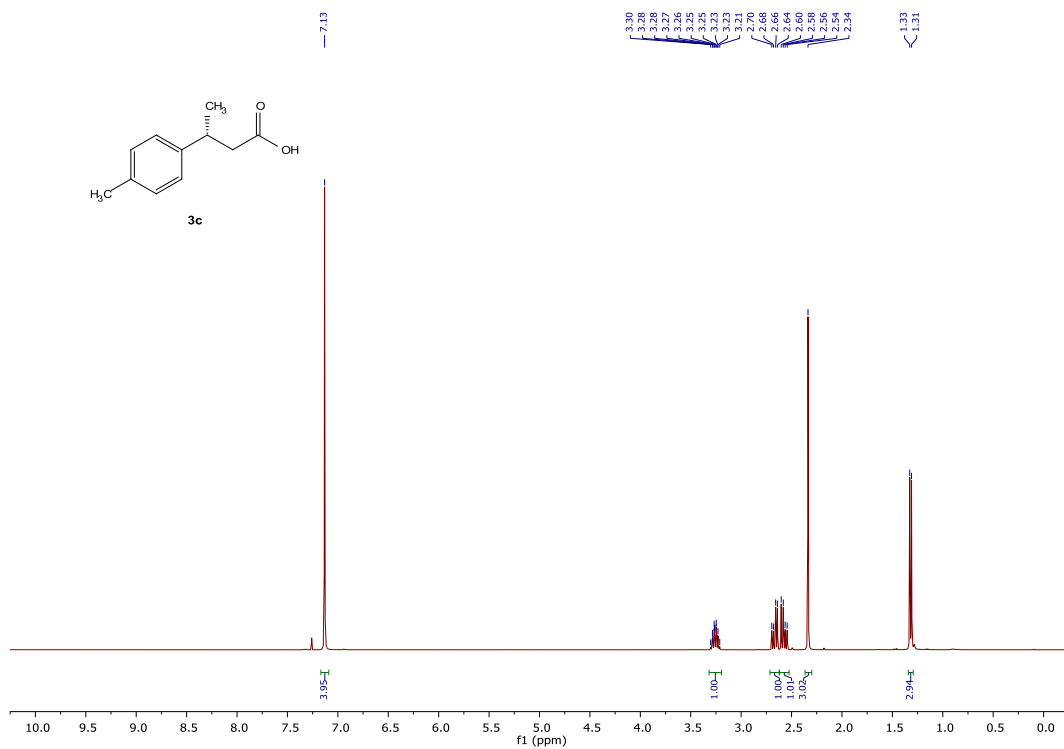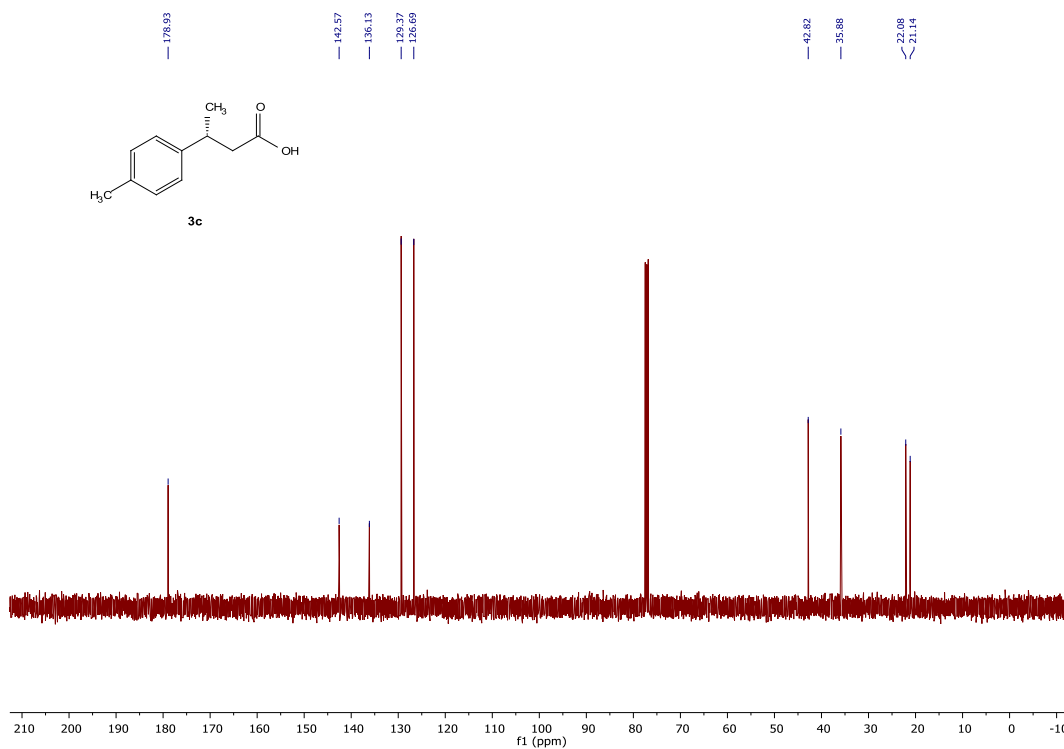

3 **Supplementary Figure 24. NMR spectra of (*R*)-3-(4-methylphenyl)butanoic acid (**3c**)**

4

5



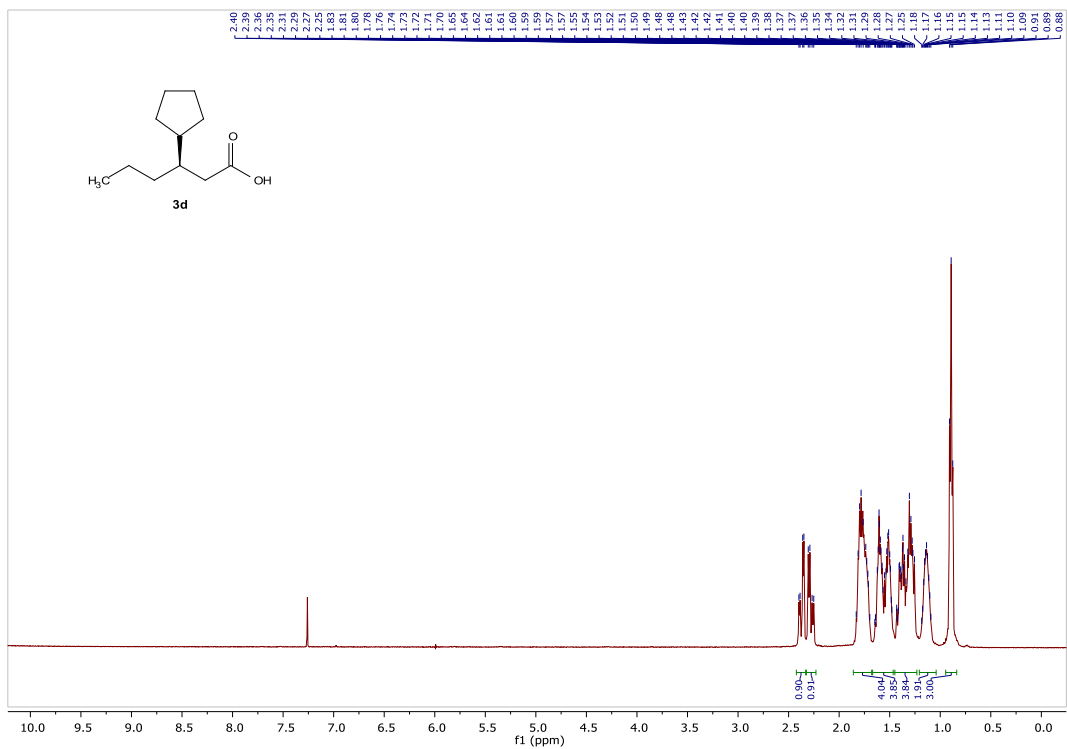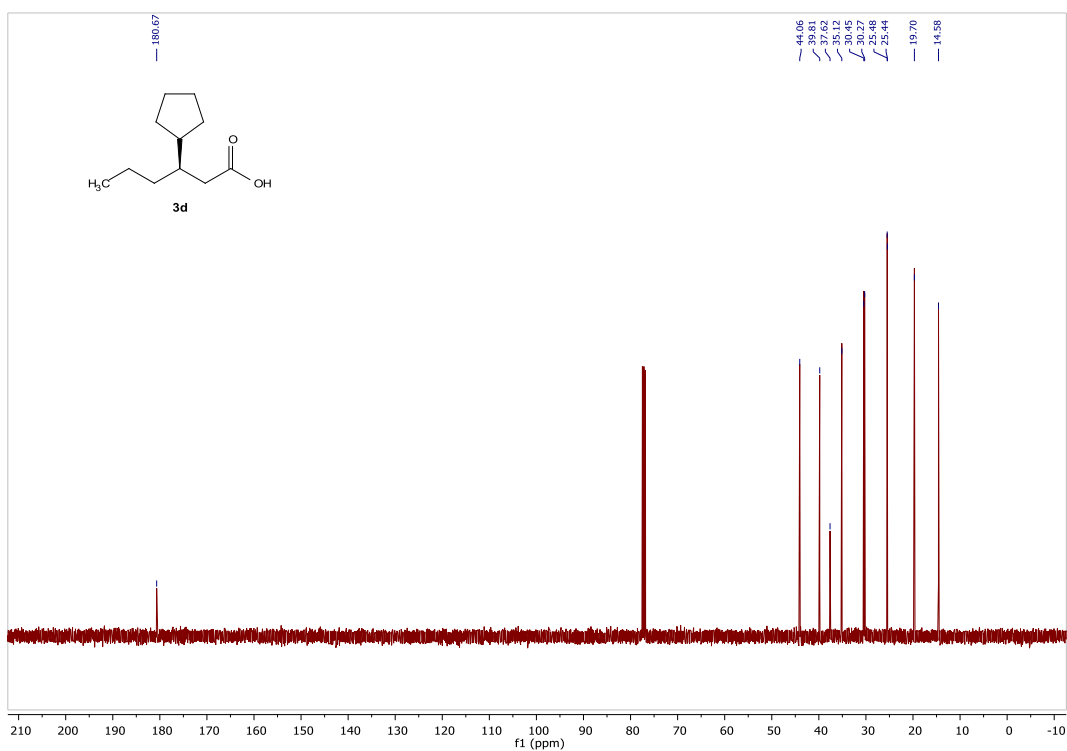

3 **Supplementary Figure 25. NMR spectra of (*R*)-3-cyclopentylhexanoic acid (3d)**

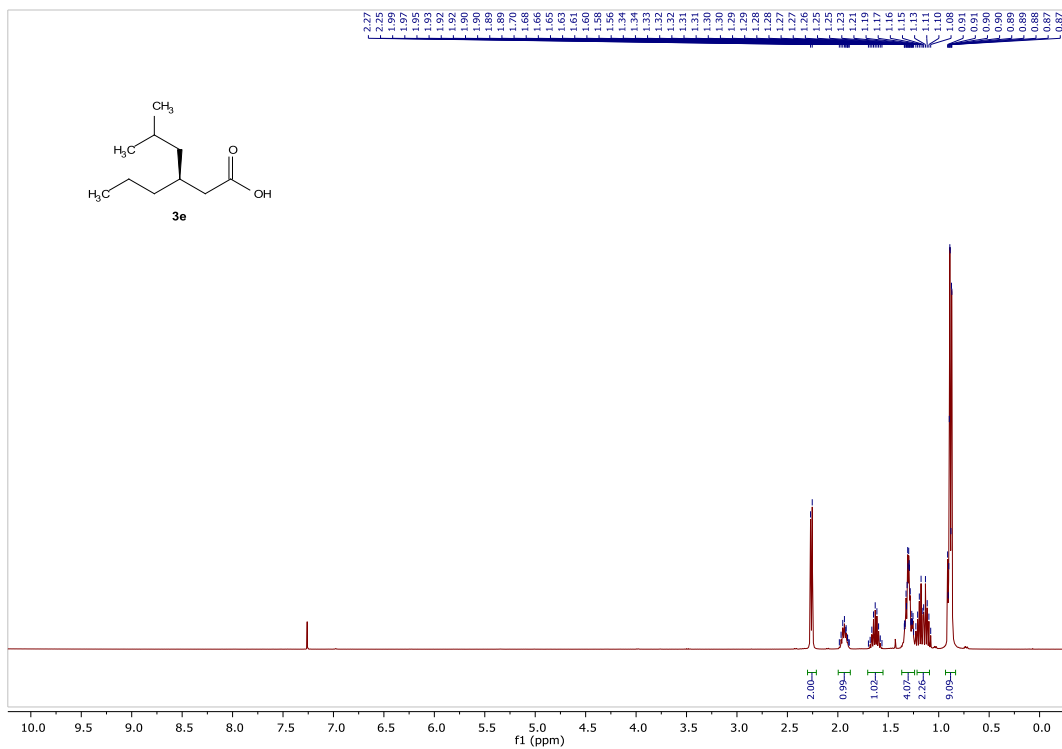

1

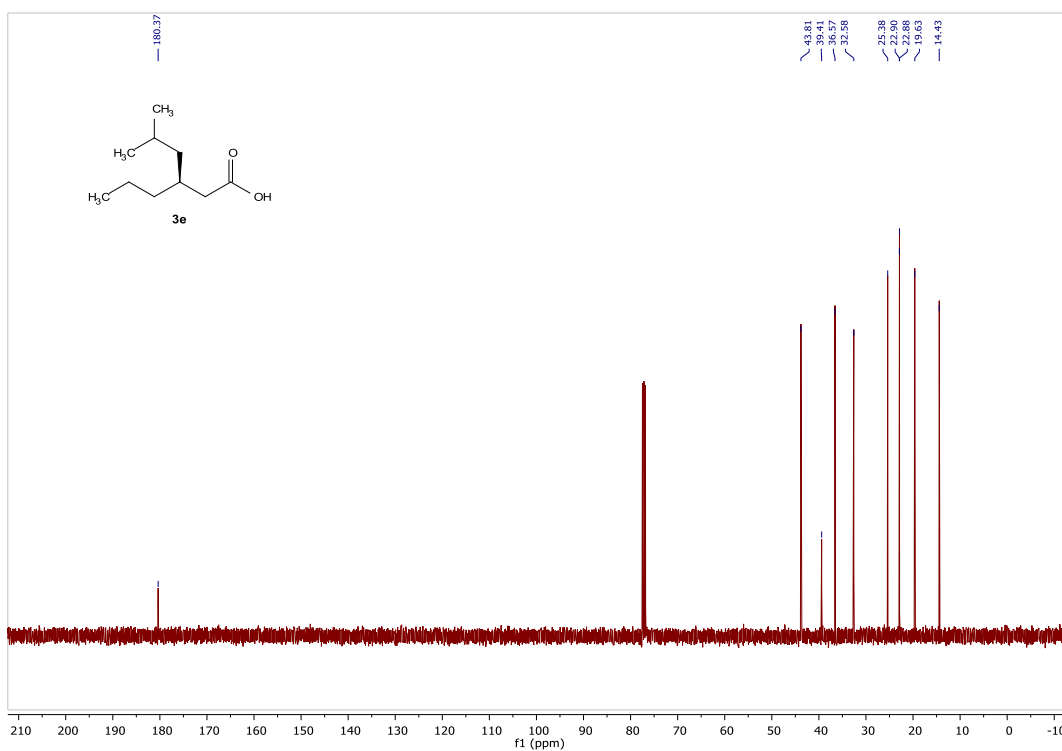

2

3 **Supplementary Figure 26. NMR spectra of (*S*)-5-methyl-3-propylhexanoic acid (**3e**)**

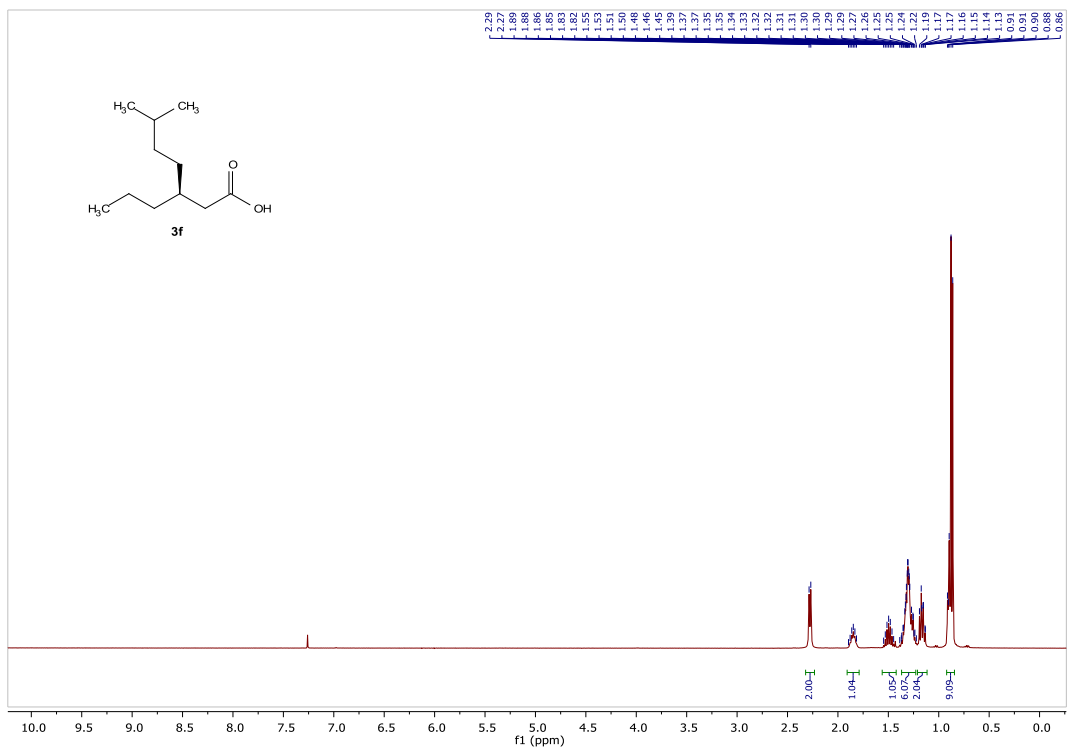

1

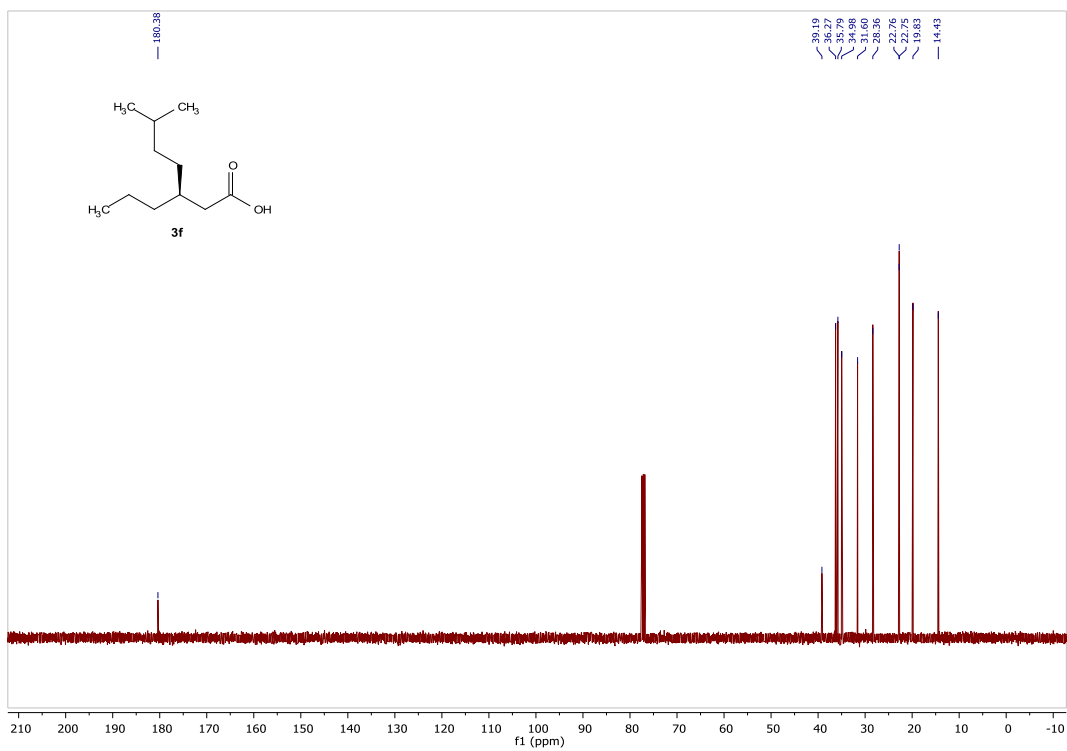

2

3 **Supplementary Figure 27. NMR spectra of (S)-6-methyl-3-propylheptanoic acid (3f)**

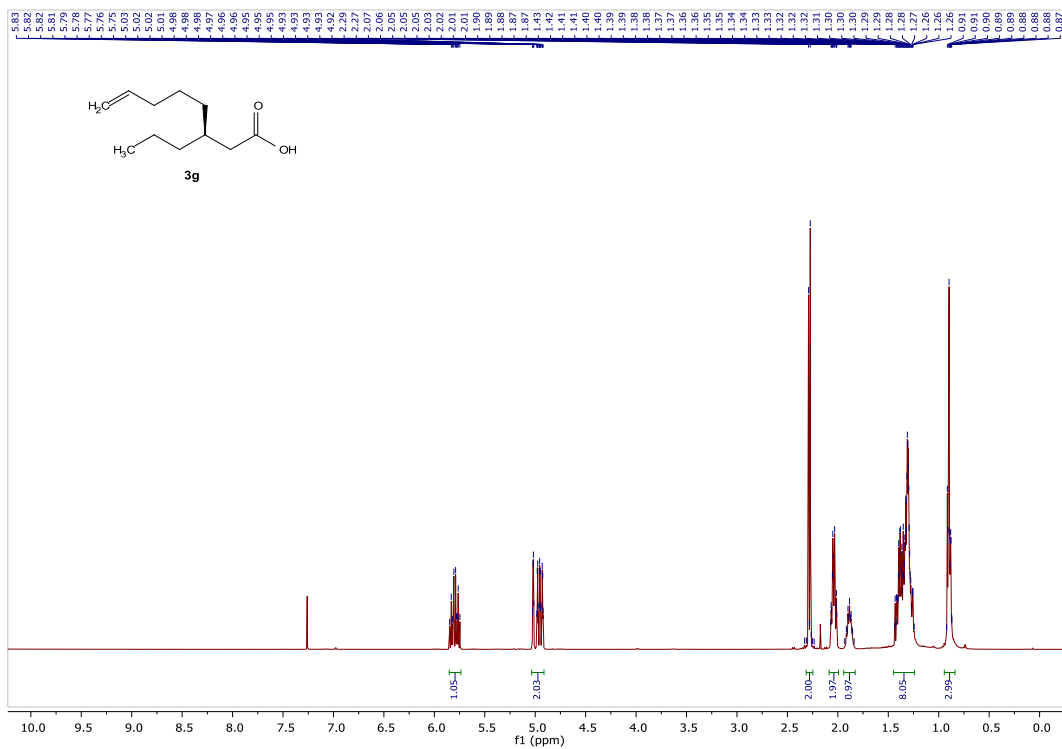

1

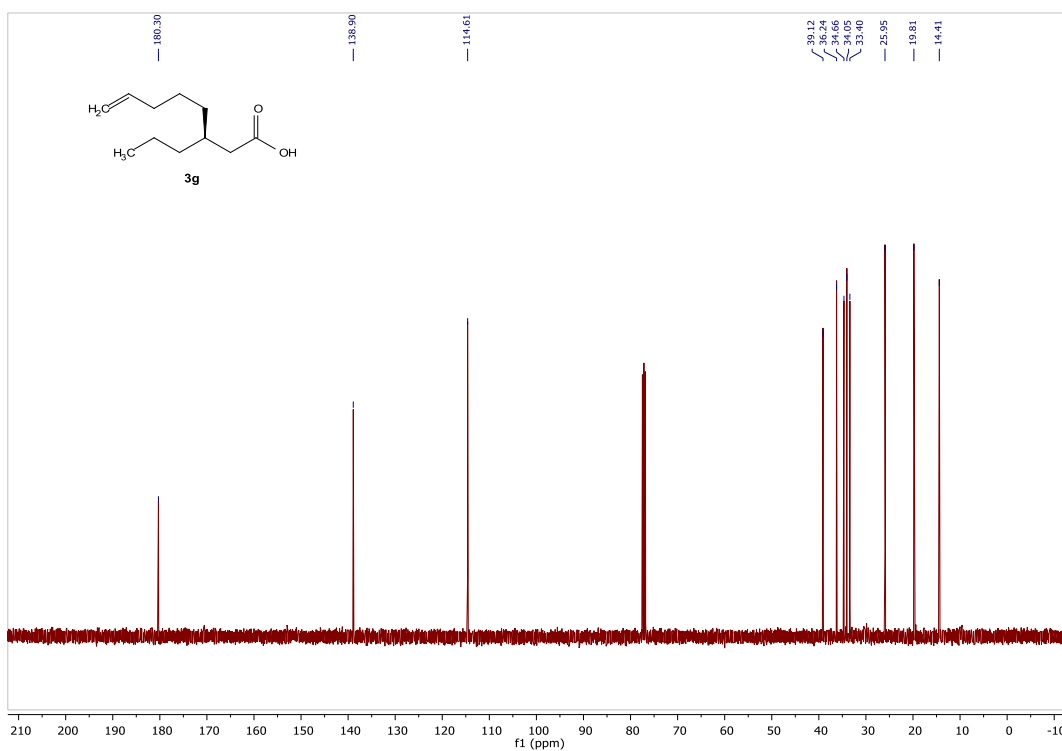

2

3 **Supplementary Figure 28. NMR spectra of (S)-3-propyl-oct-7-enoic acid (3g)**

4

5

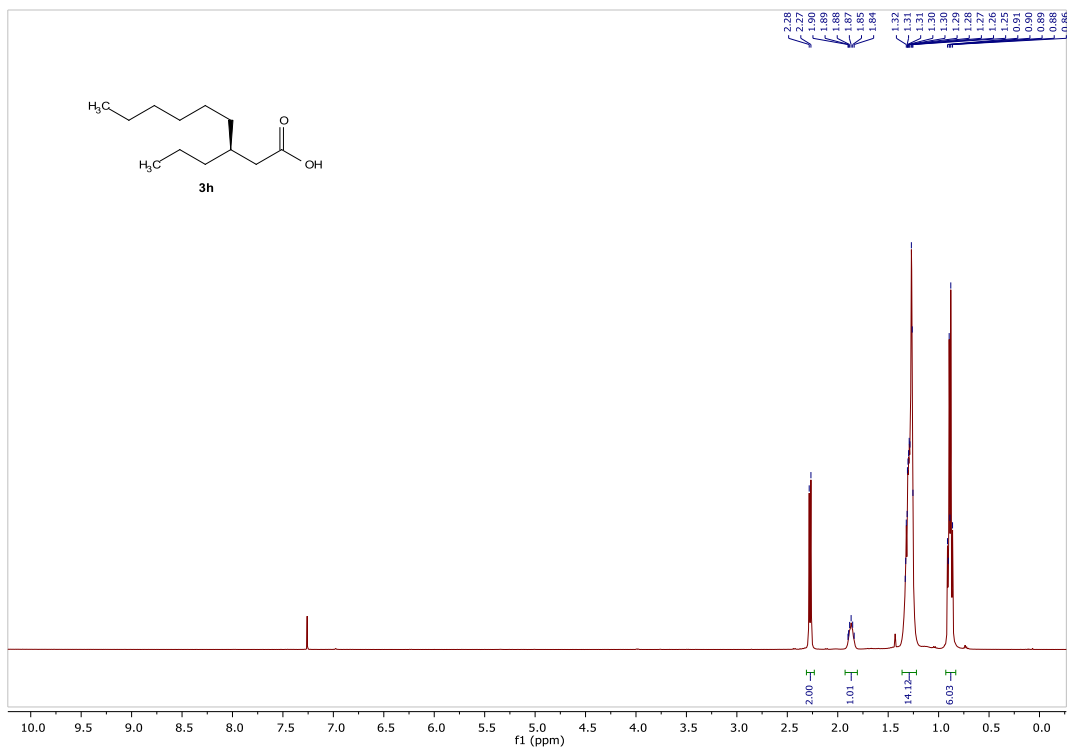

1

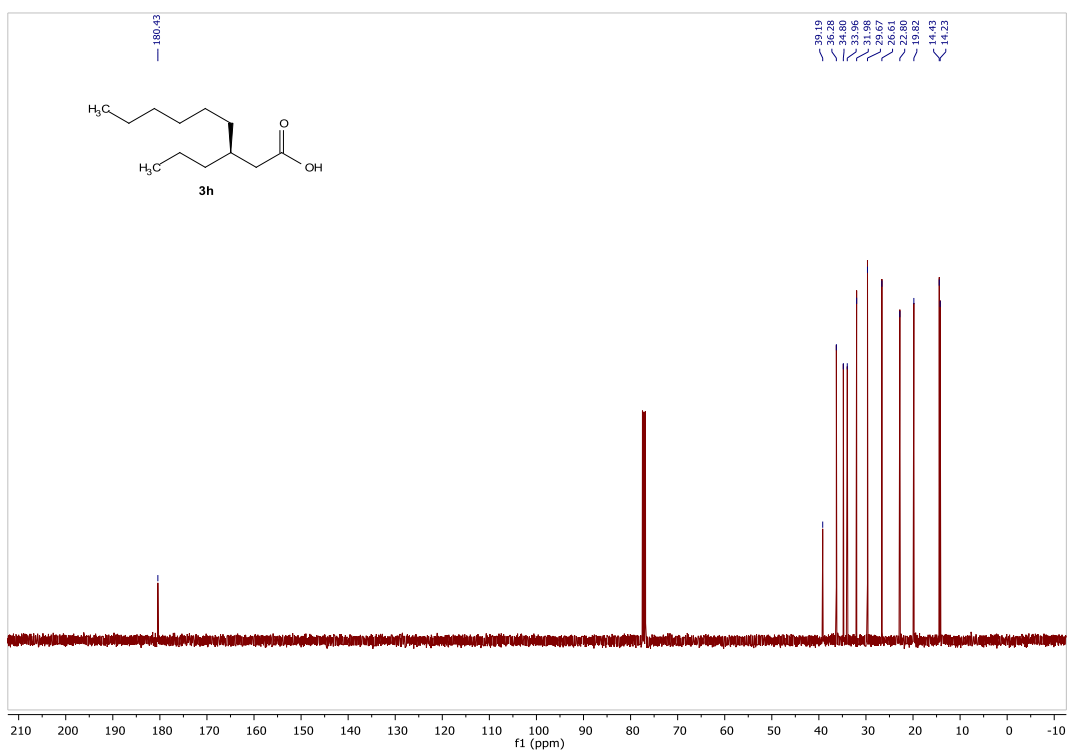

2

3 **Supplementary Figure 29. NMR spectra of (S)-3-propylnonanoic acid (3h)**

4

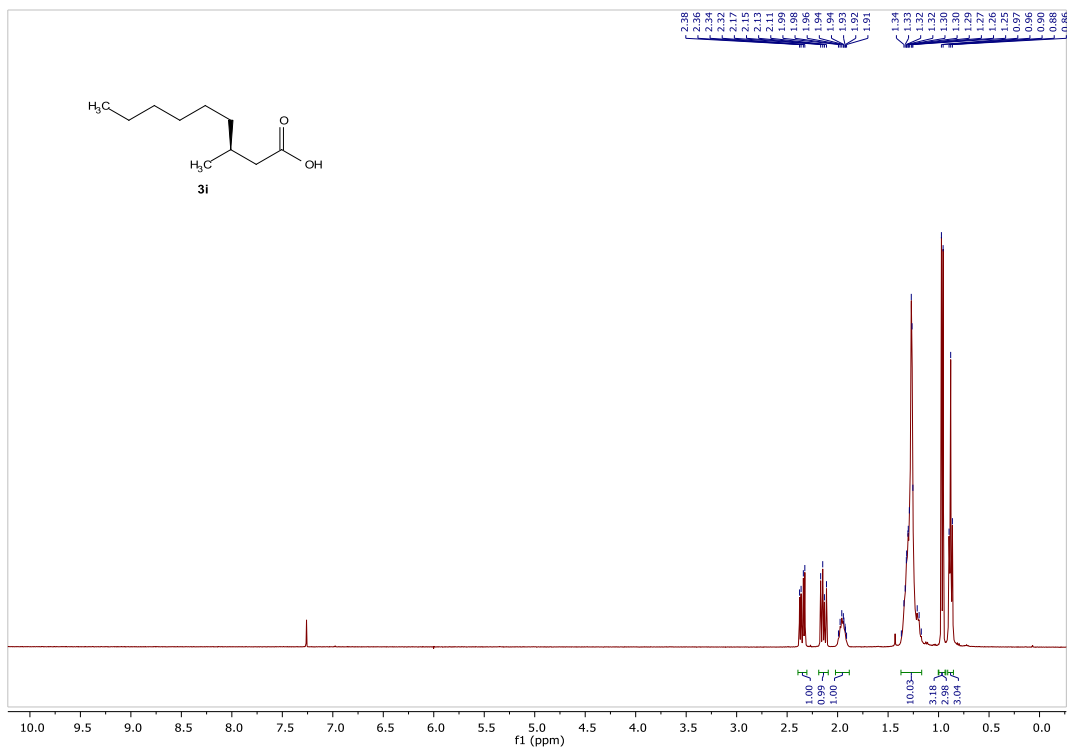

1

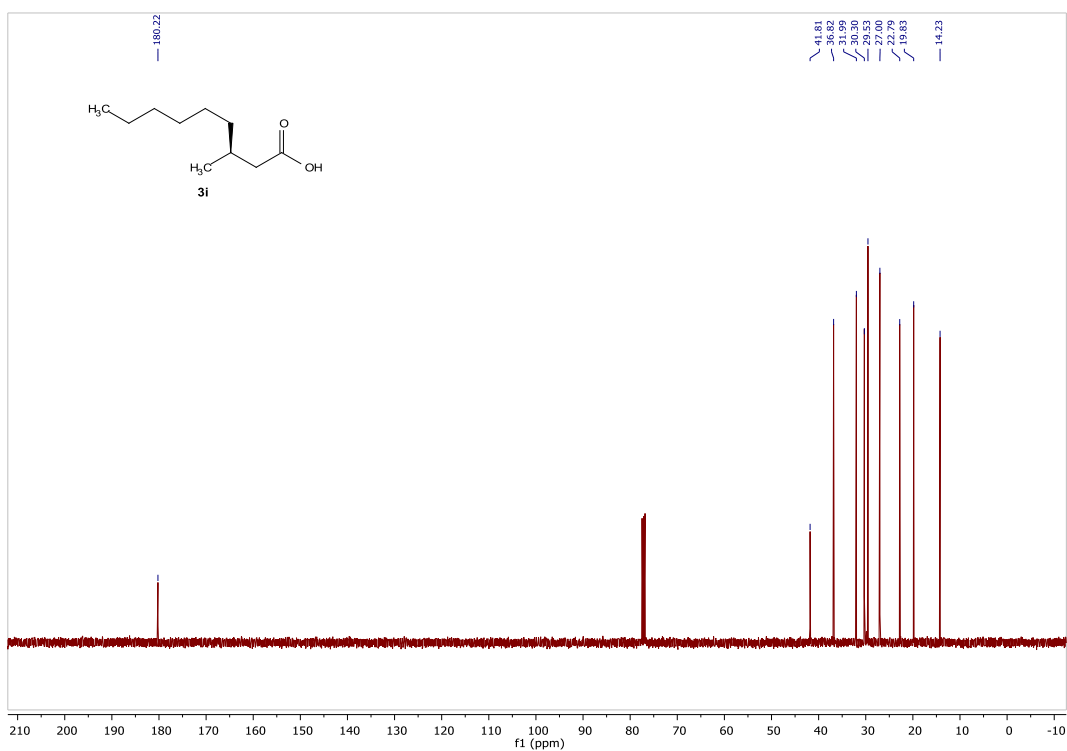

2

3 **Supplementary Figure 30. NMR spectra of (*S*)-3-methylnonanoic acid (3i)**

4

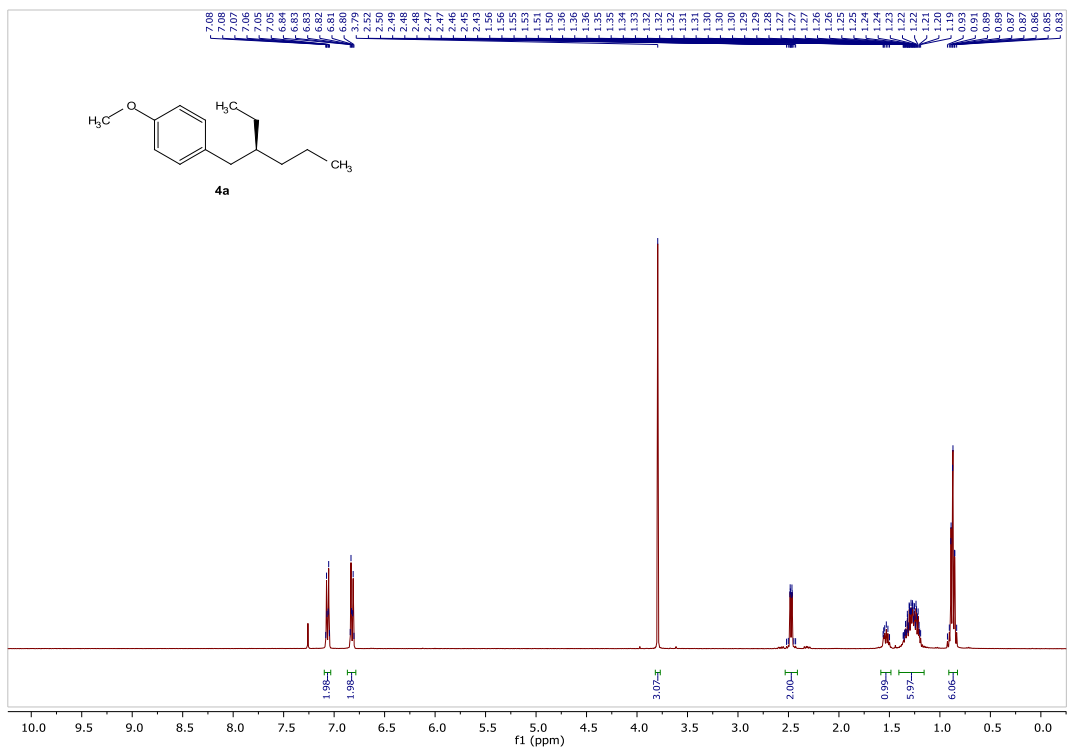

1

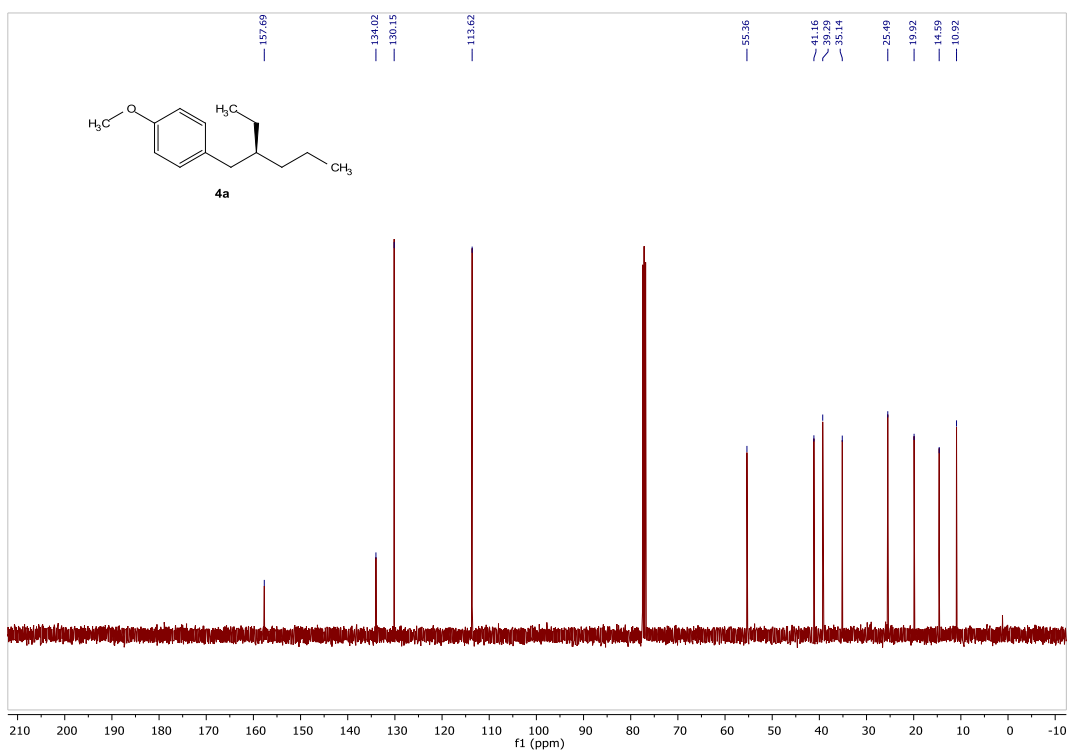

2

3 **Supplementary Figure 31. NMR spectra of (*S*)-1-(2-ethylpentyl)-4-methoxy-benzene (4a)**

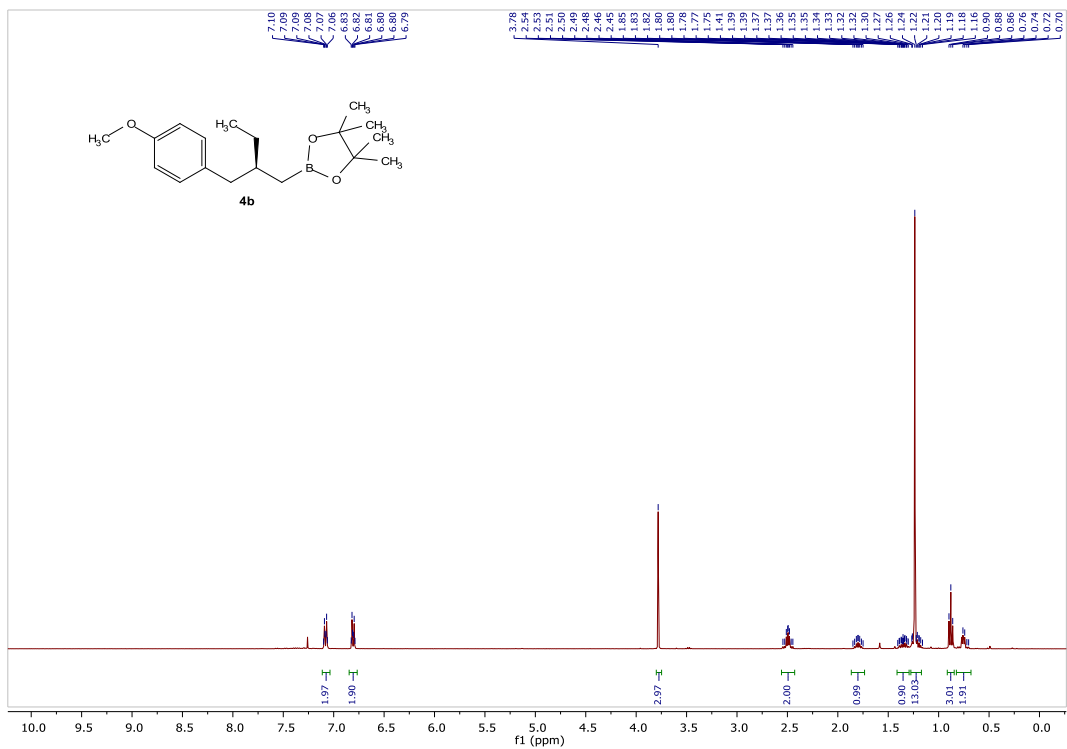

1

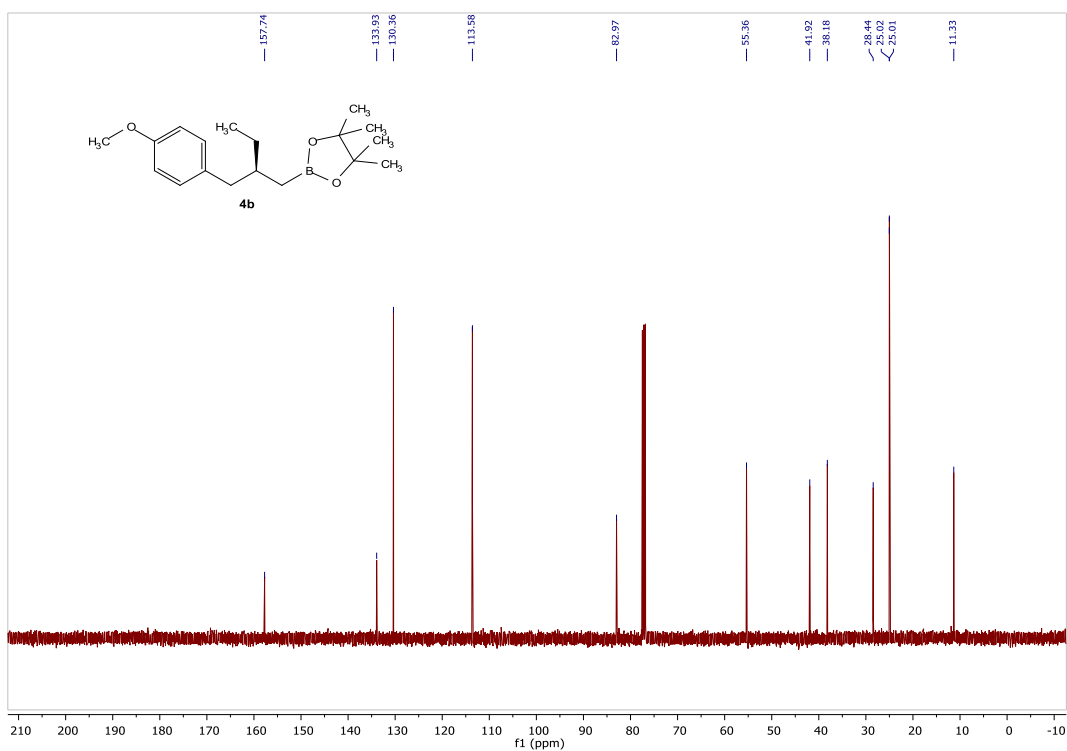

2

3 **Supplementary Figure 32. NMR spectra of (*R*)-4,4,5,5-tetramethyl-2-(2-(4-**  
 4 **methoxybenzyl)butyl)-1,3,2-dioxaborolane (**4b**)**



1

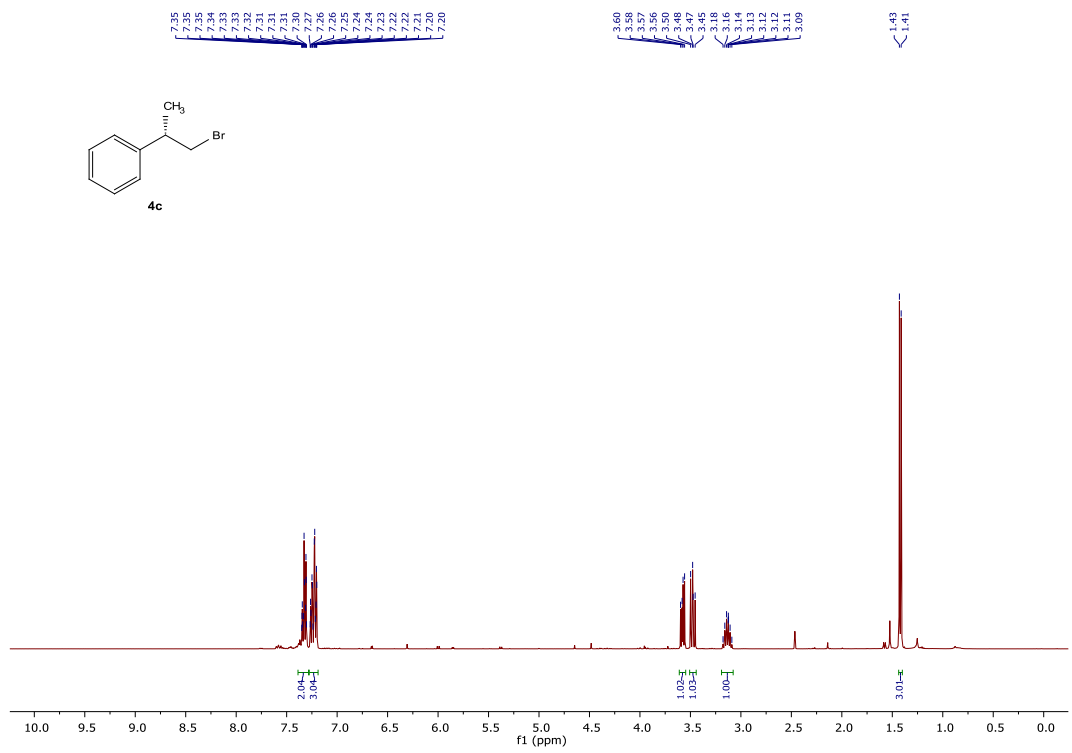

2

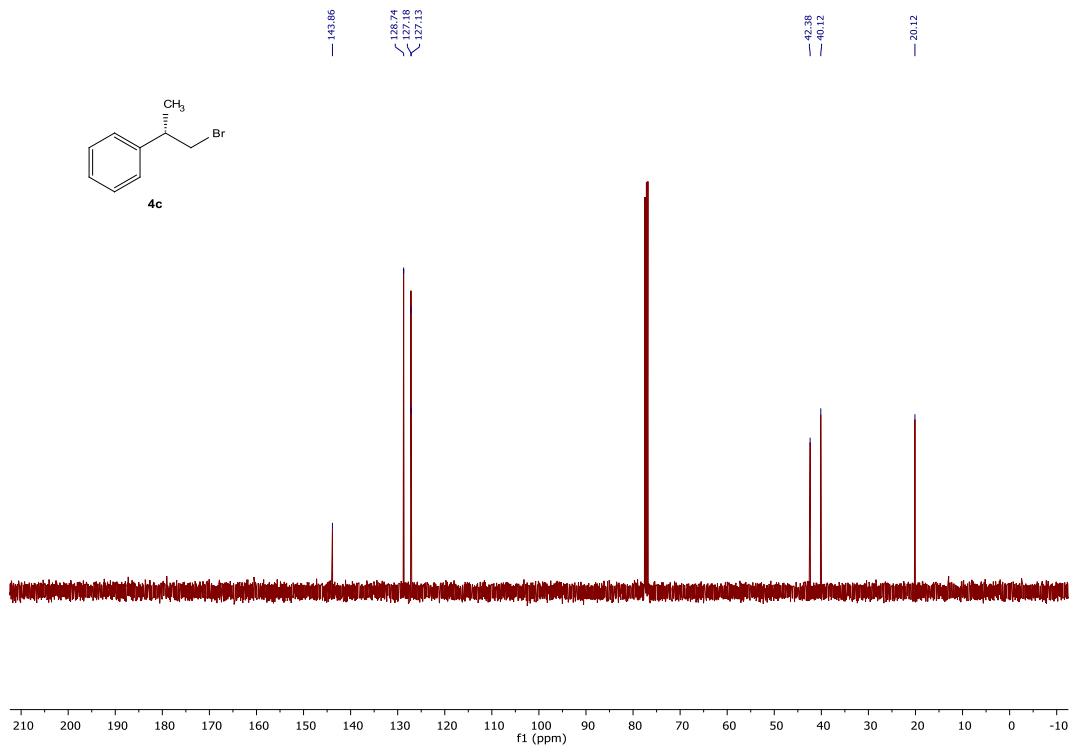

3 **Supplementary Figure 33. NMR spectra of (R)-(2-bromo-1-methylethyl)benzene (4c)**

4

5

1

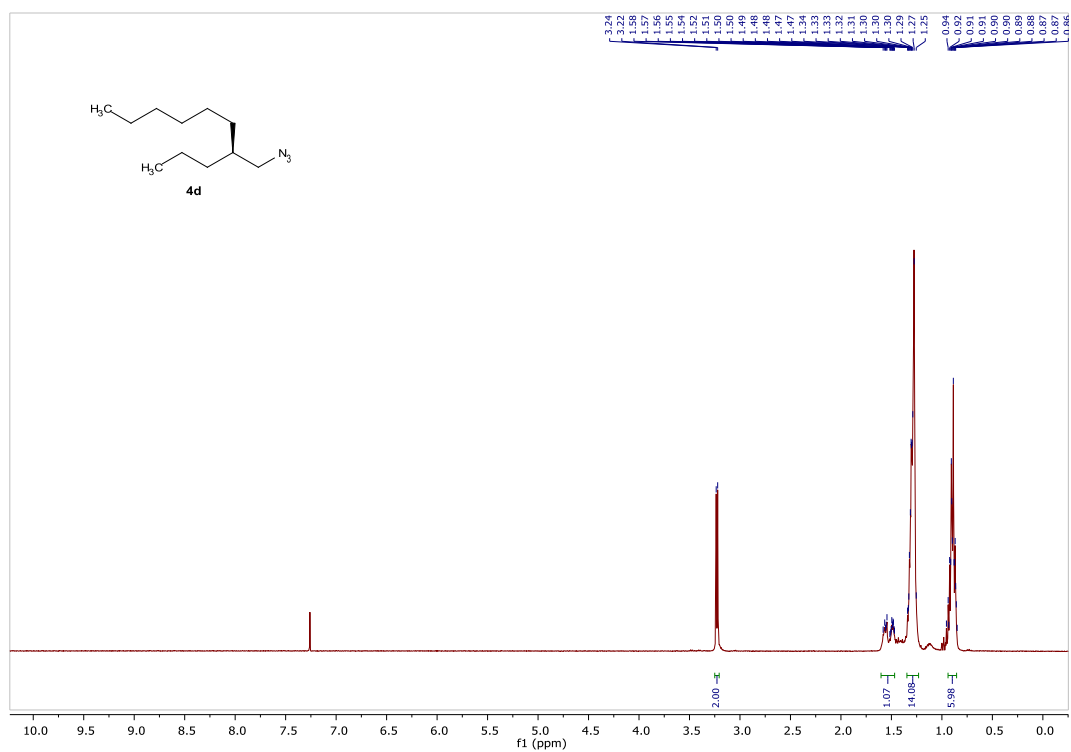

2

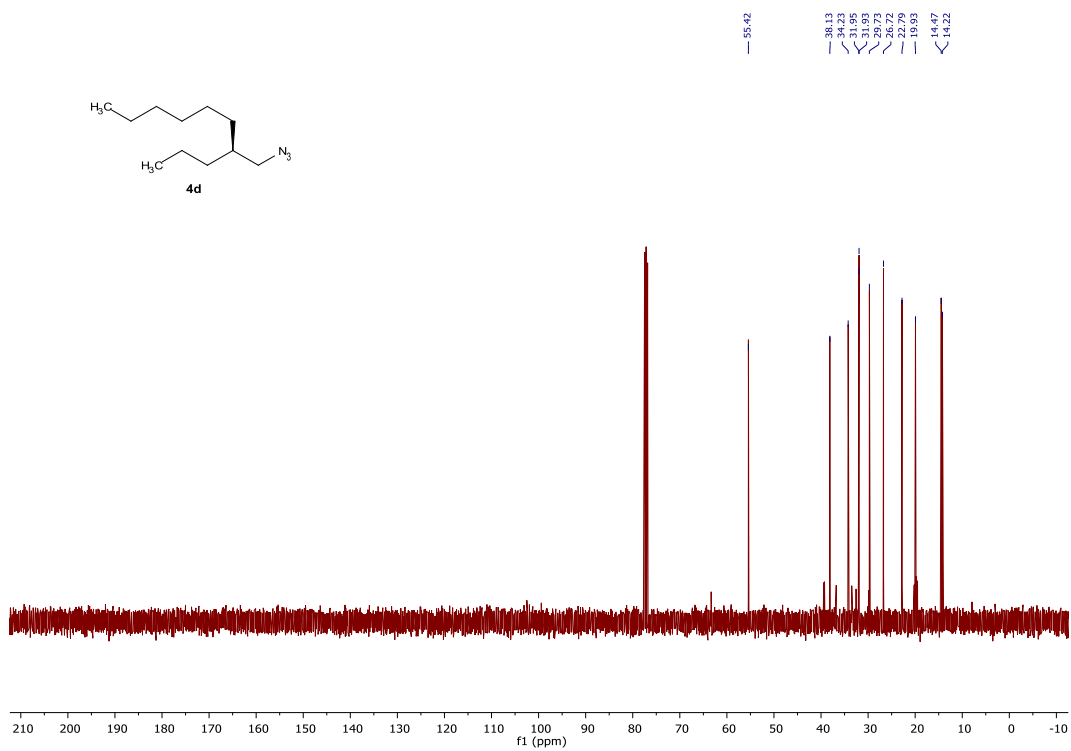

3 Supplementary Figure 34. NMR spectra of (S)-1-azido-2-propyloctane (4d)

1

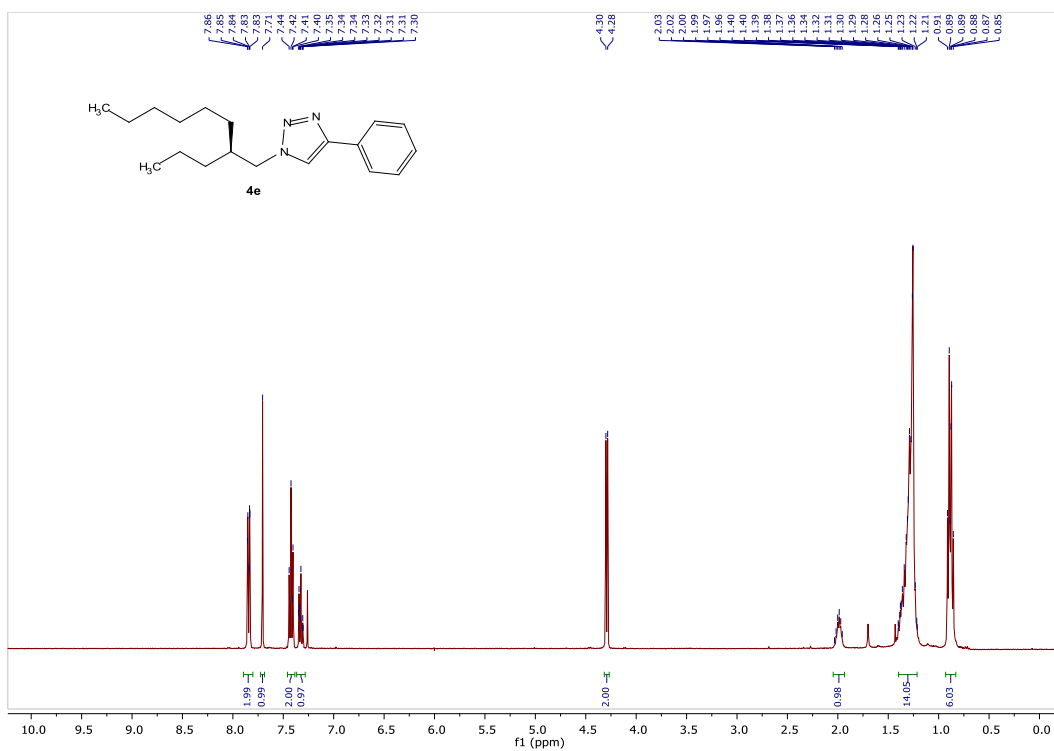

2

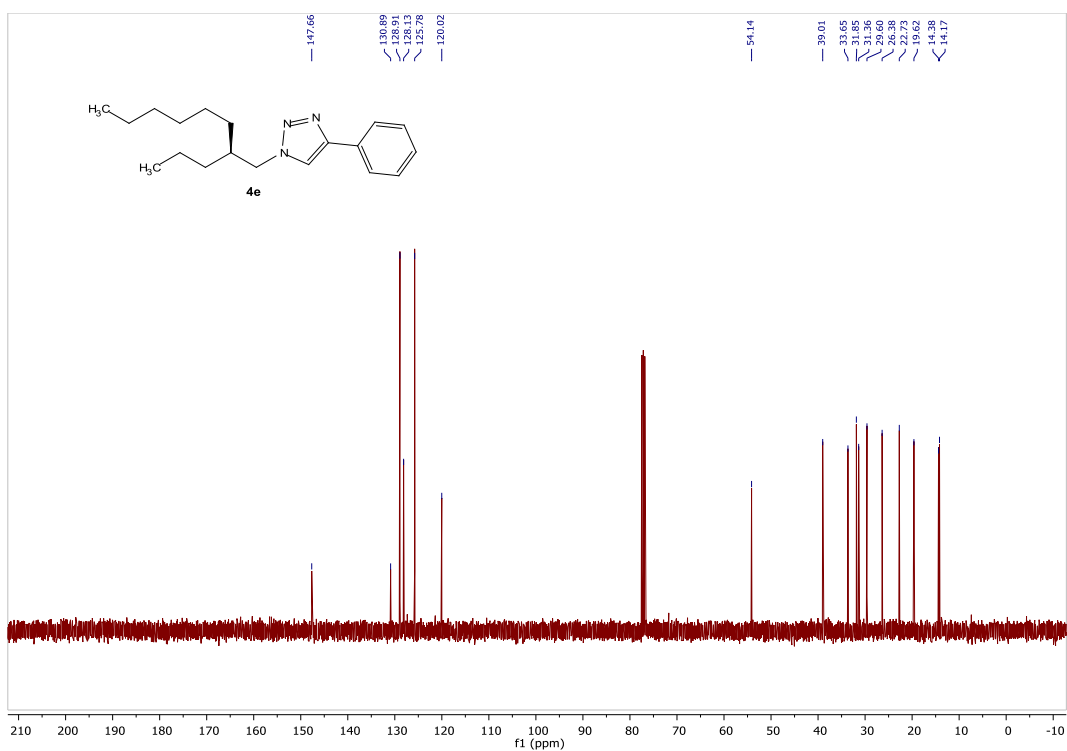

3

4 **Supplementary Figure 35. NMR spectra of (S)-1-(2-propyl)octyl-4-phenyl-1H-1,2,3-**  
 5 **triazole (4e)**

6

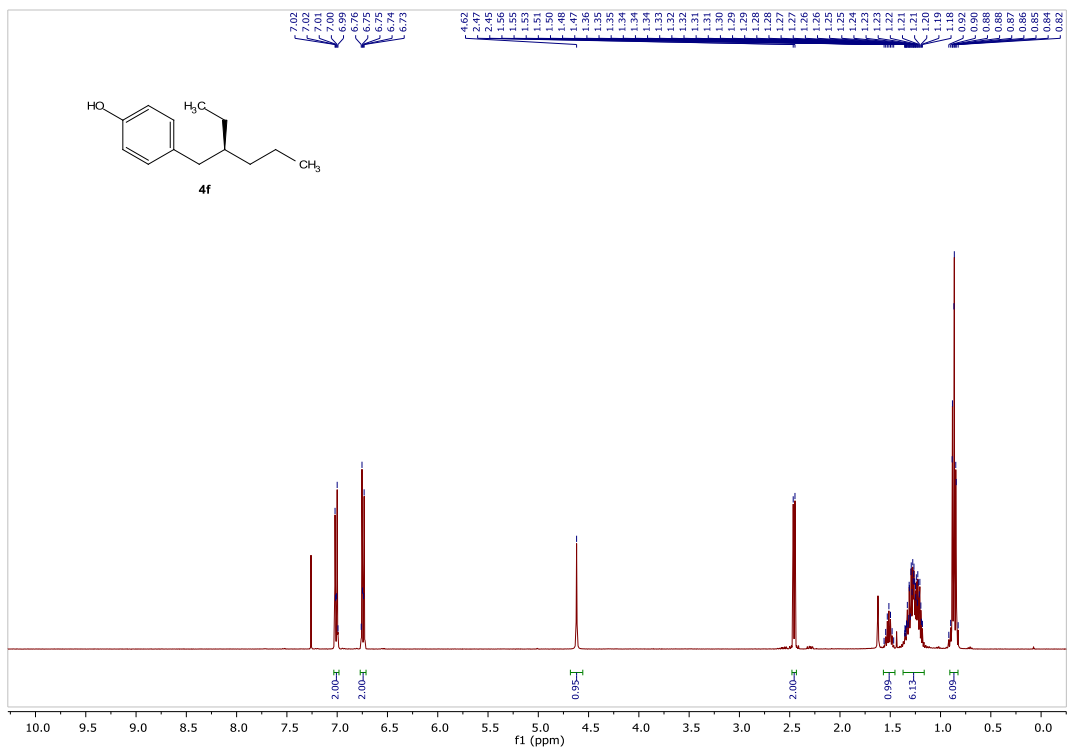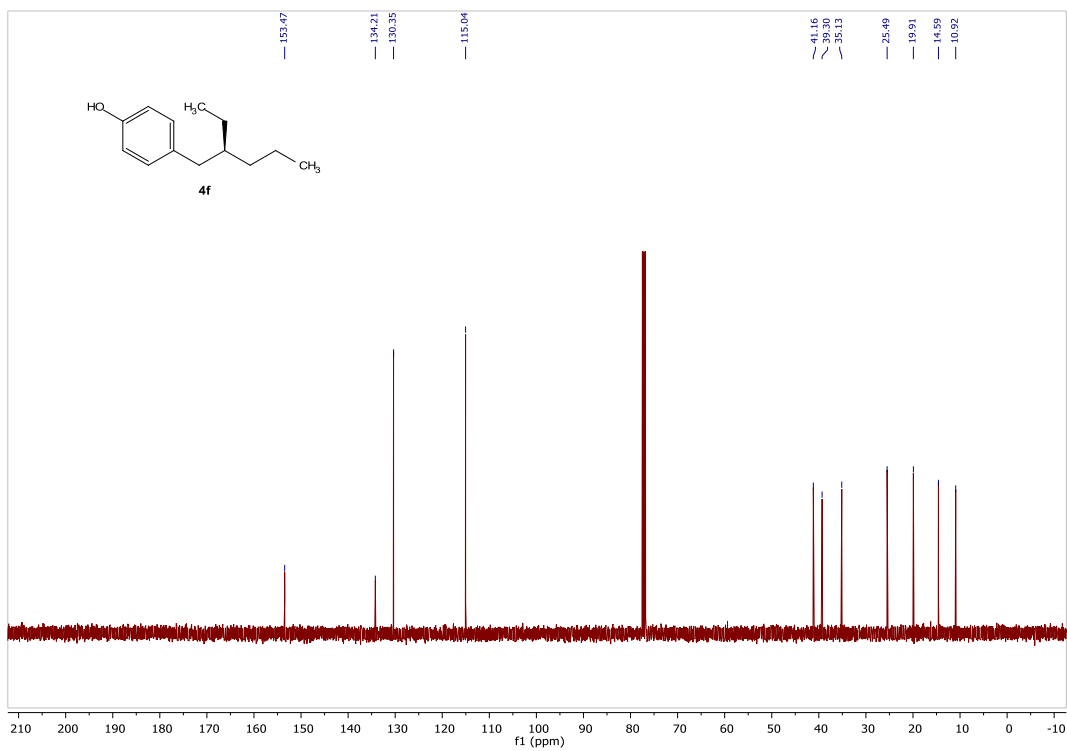

**3** Supplementary Figure 36. NMR spectra of (*S*)-4-(2-ethylpentyl)phenol (**4f**)

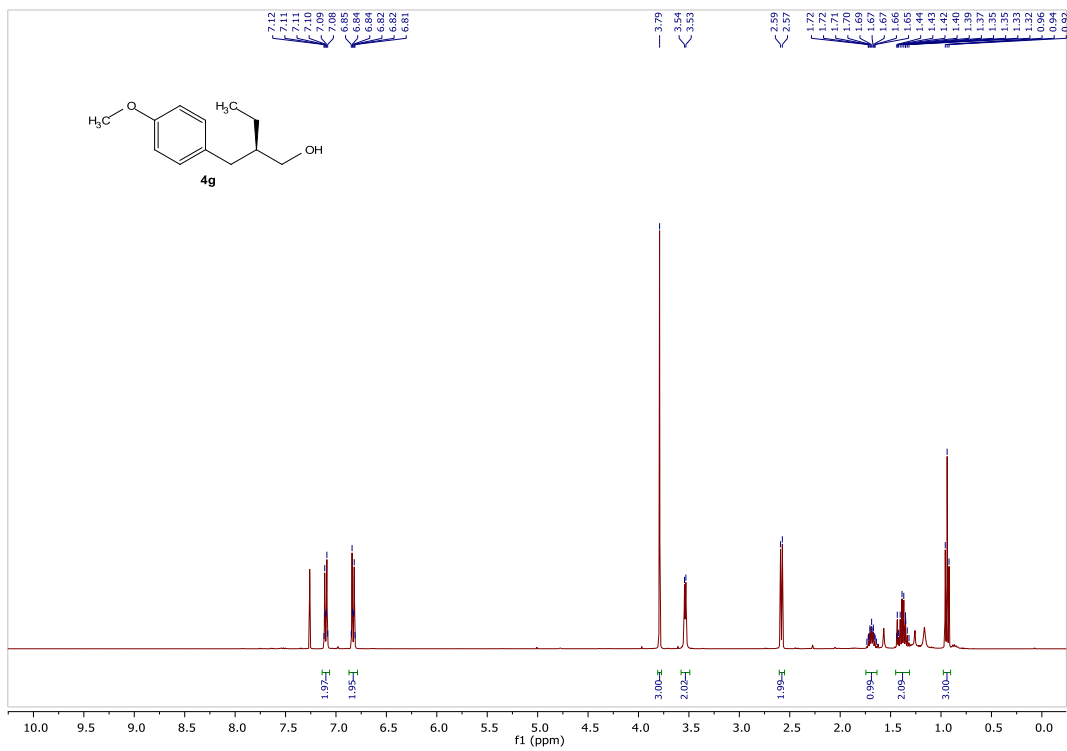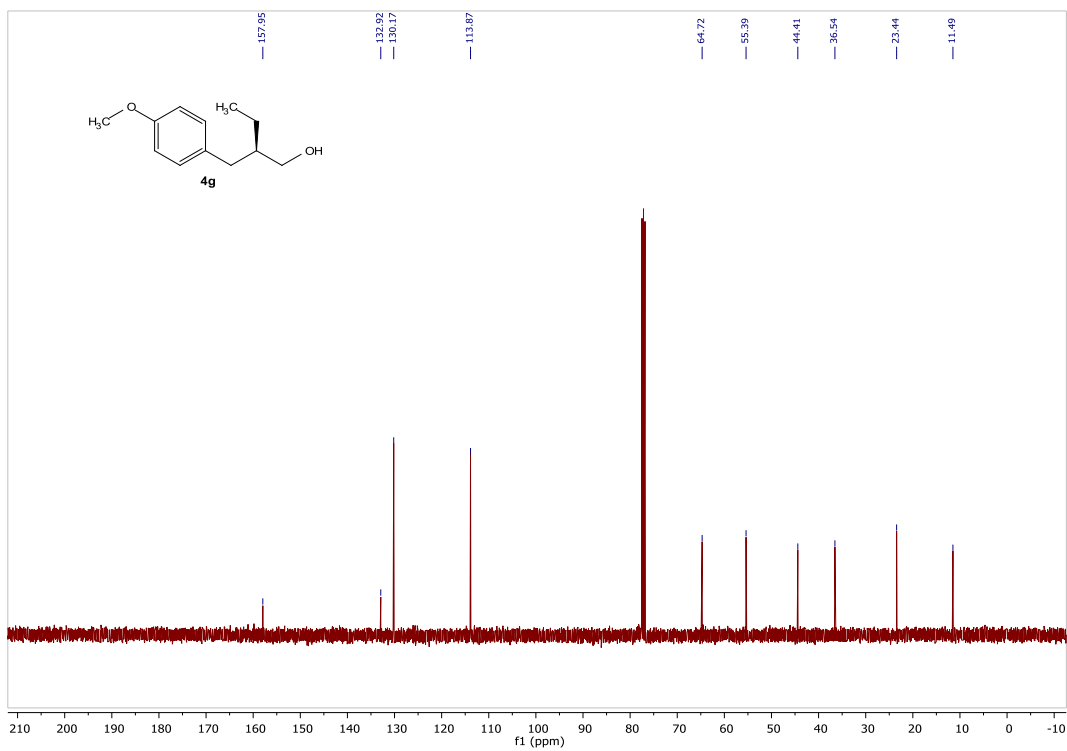

3 **Supplementary Figure 37. NMR spectra of (*R*)-2-(4-methoxybenzyl)butan-1-ol (**4g**)**

4

5

1

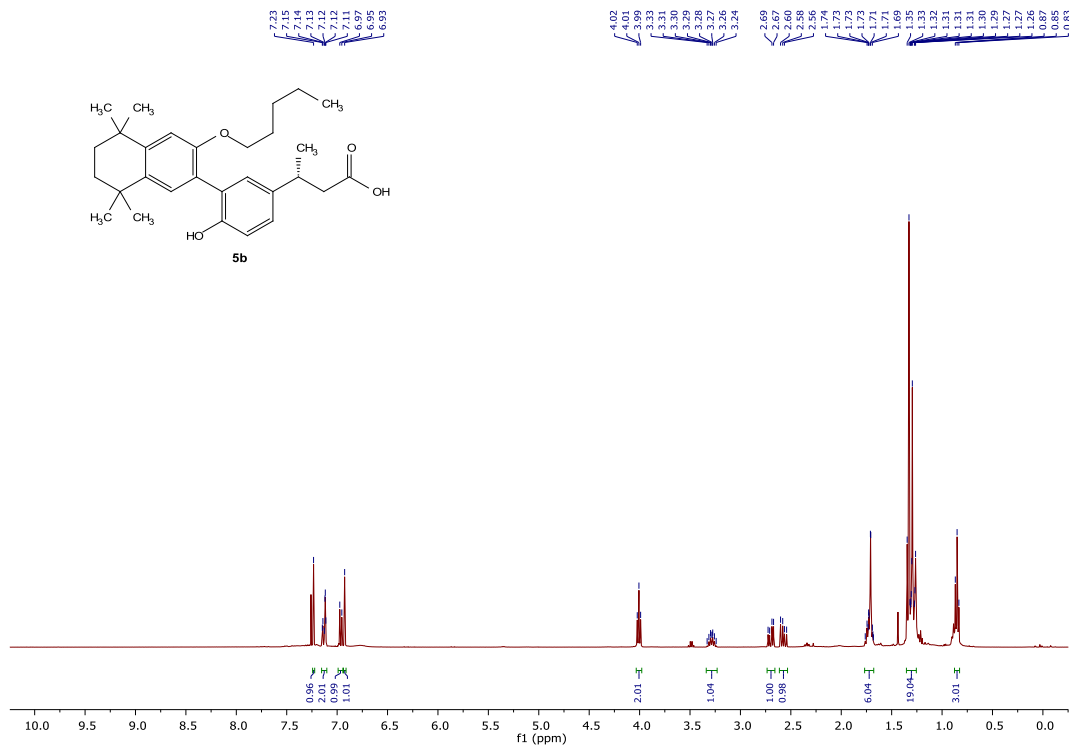

2

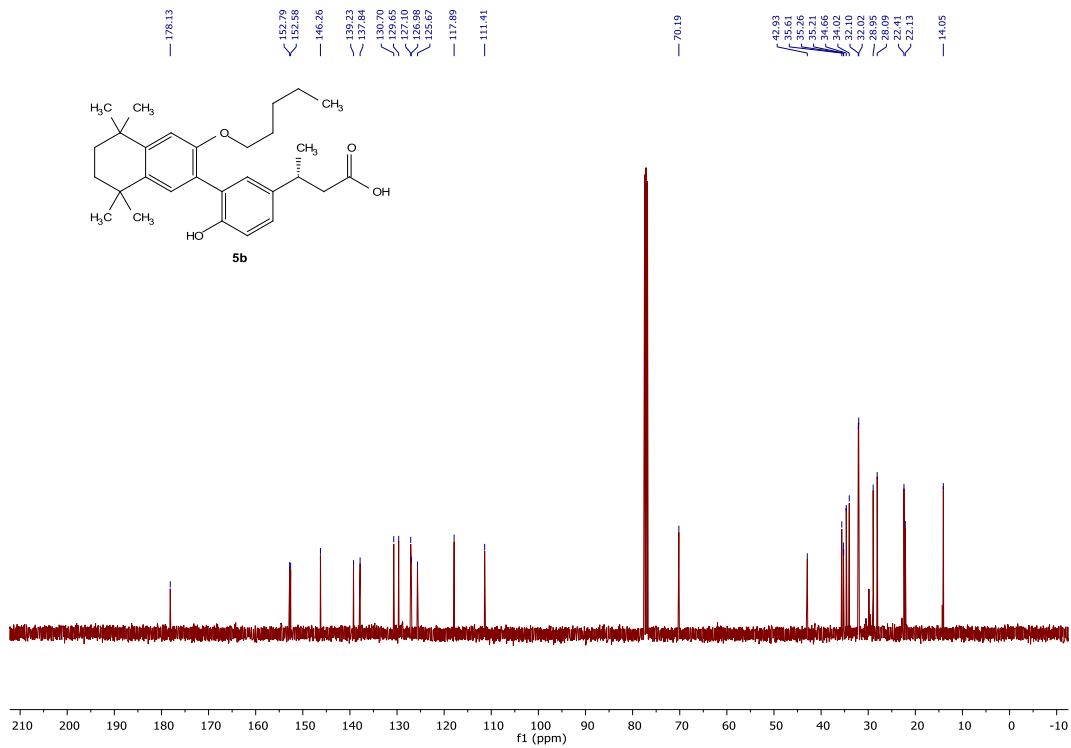

3 **Supplementary Figure 38. NMR spectra of (R)-3-(4-hydroxy-3-(5,6,7,8-tetrahydro-**  
4 **5,5,8,8-tetramethyl-3-pentyloxy-2-naphthalenyl)phenyl) butanoic acid (5b)**

5

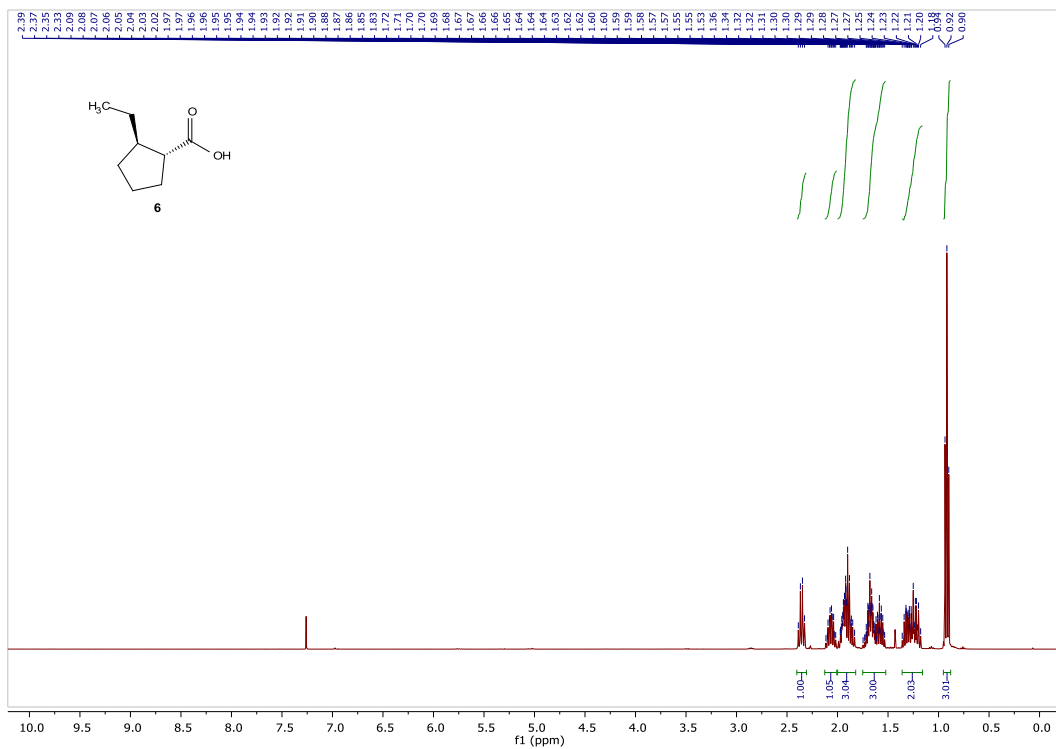

1

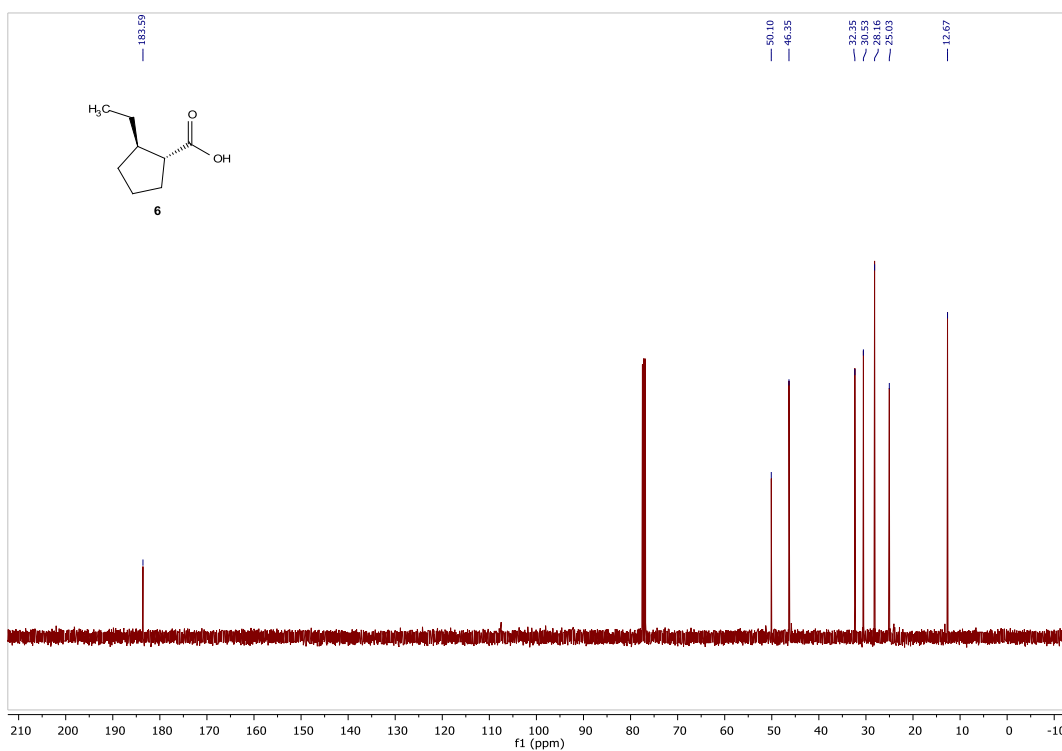

2

3 **Supplementary Figure 39. NMR spectra of (1R,2R)-2-ethylcyclopentane-1-carboxylic**  
 4 **acid (6)**

5

6

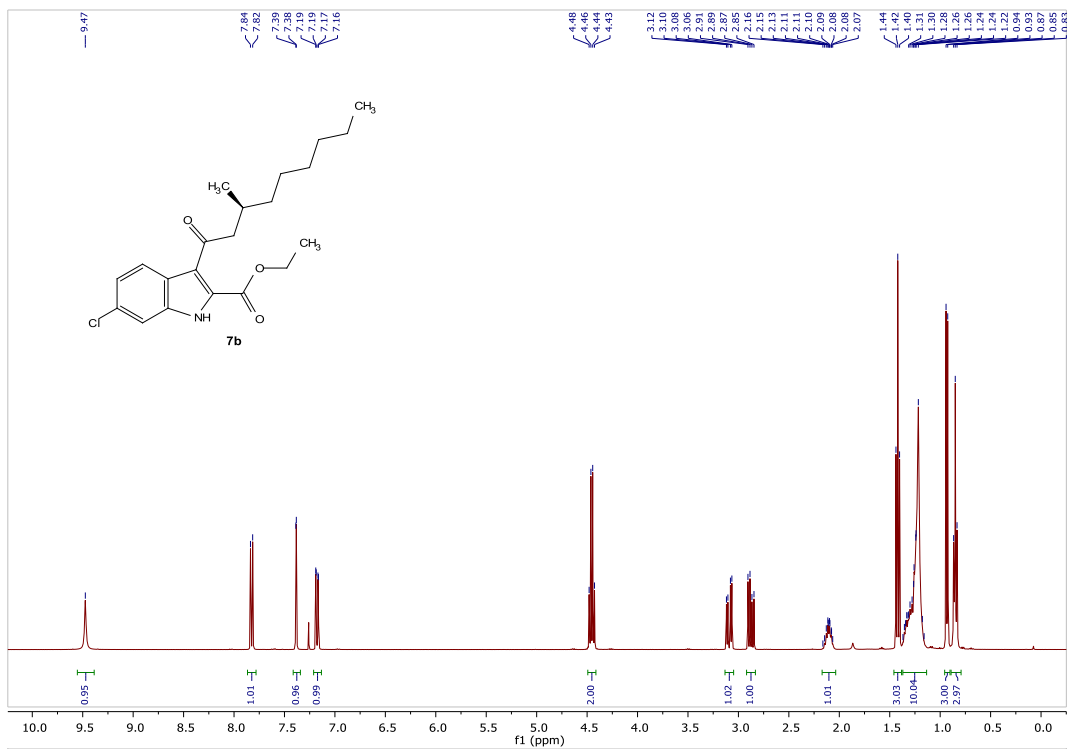

1

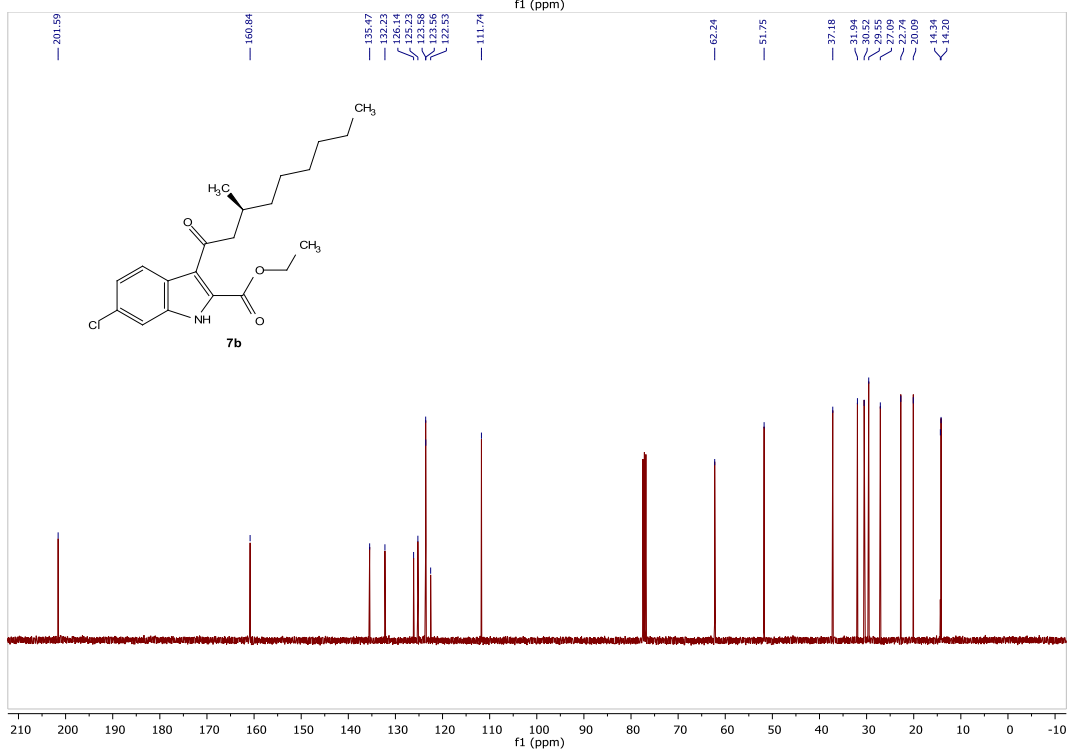

2

3 **Supplementary Figure 40. NMR spectra of (S)-ethyl 6-chloro-3-(3-methylnonanoyl)-1H-**  
 4 **indole-2-carboxylate (7b)**

5



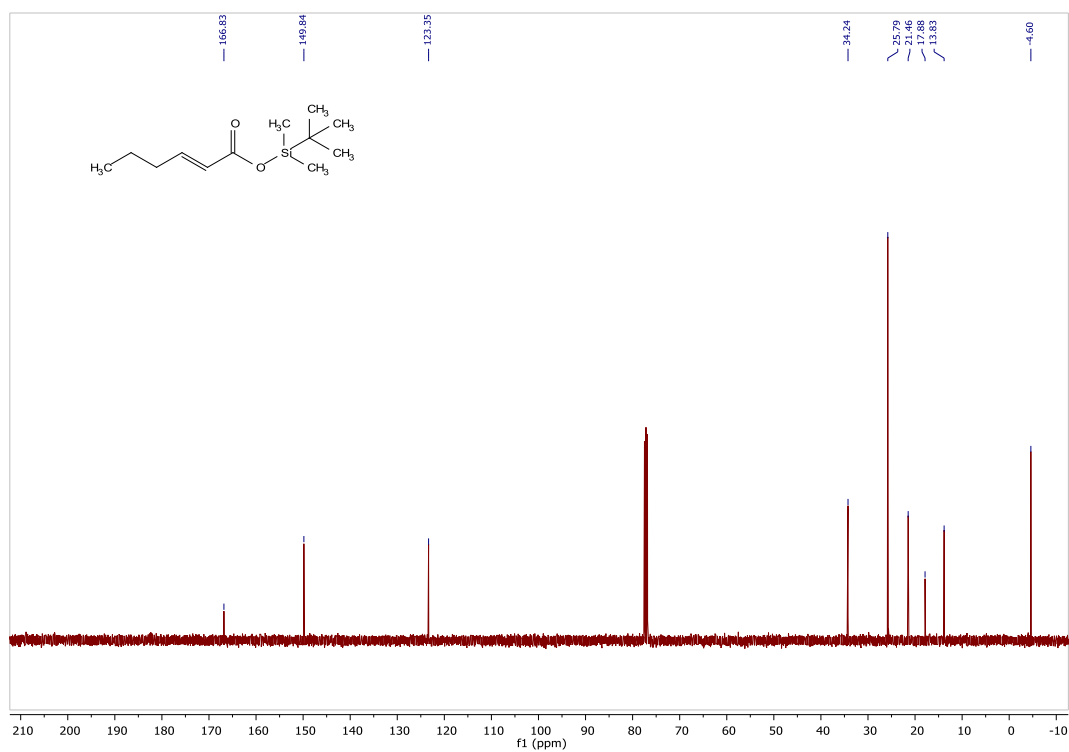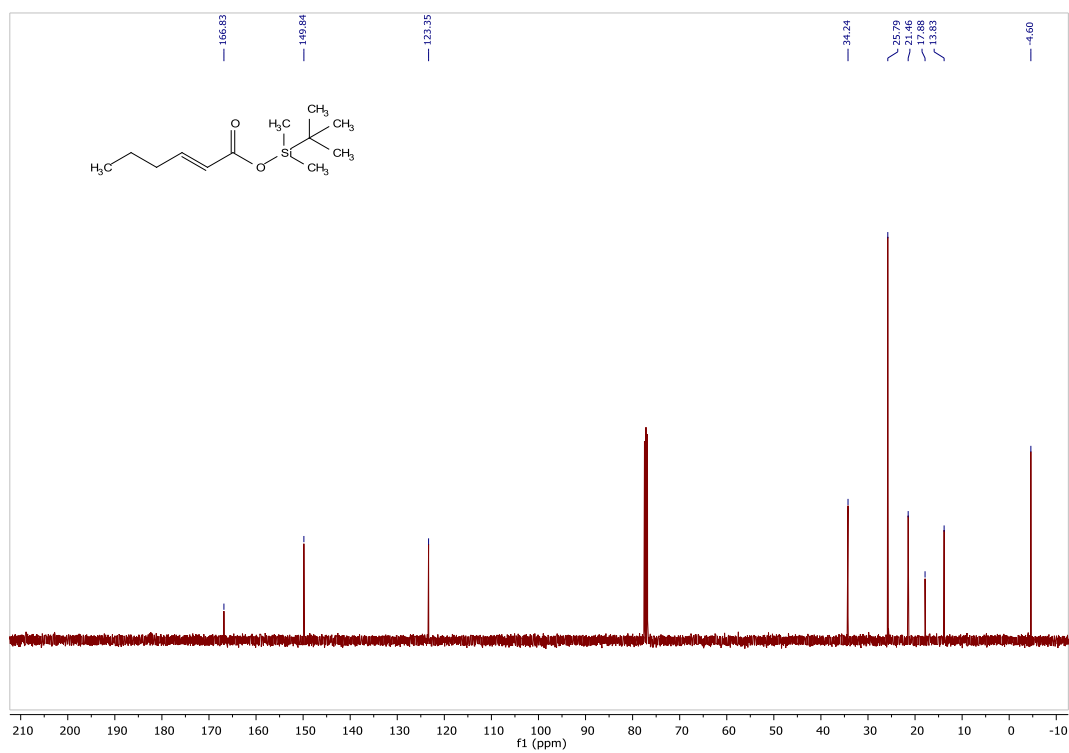

3 **Supplementary Figure 41. NMR spectra of *t*-butyldimethylsilyl hex-2-enoate**

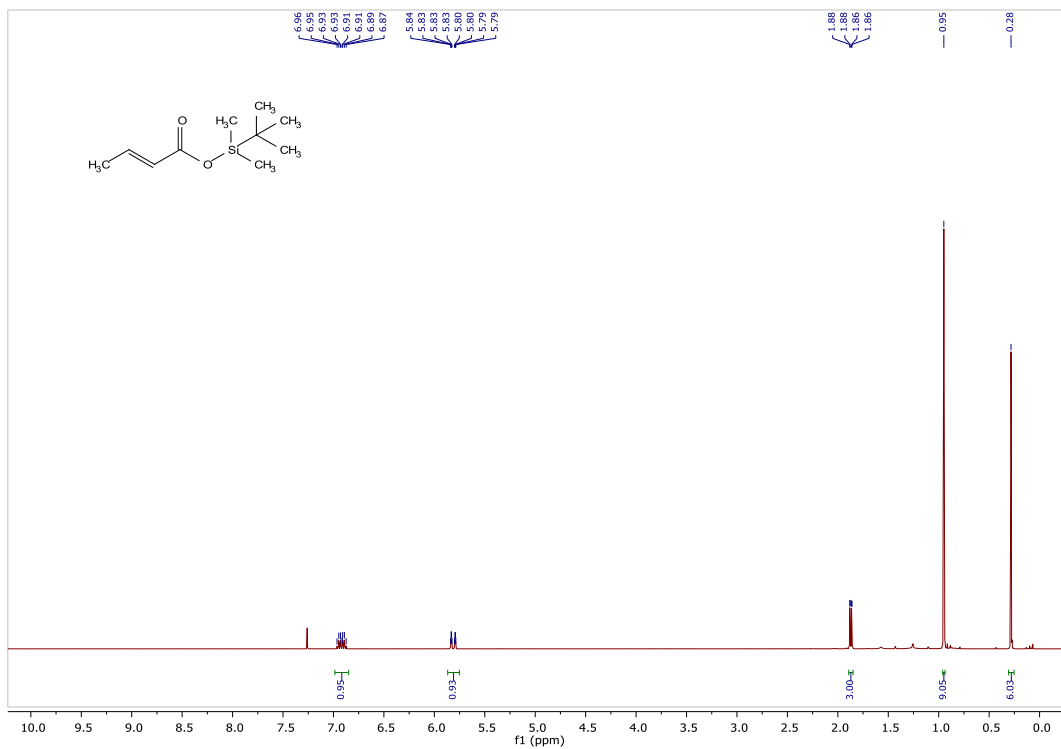

1

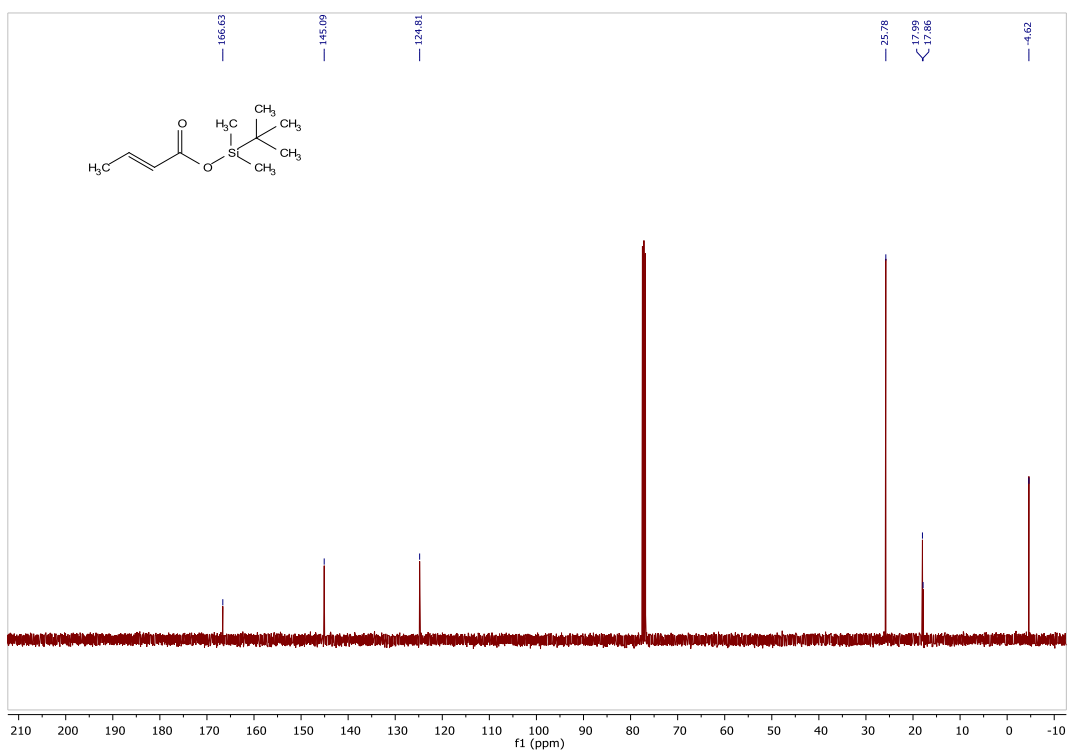

2

3 **Supplementary Figure 42. NMR spectra of *t*-butyldimethylsilyl but-2-enoate**

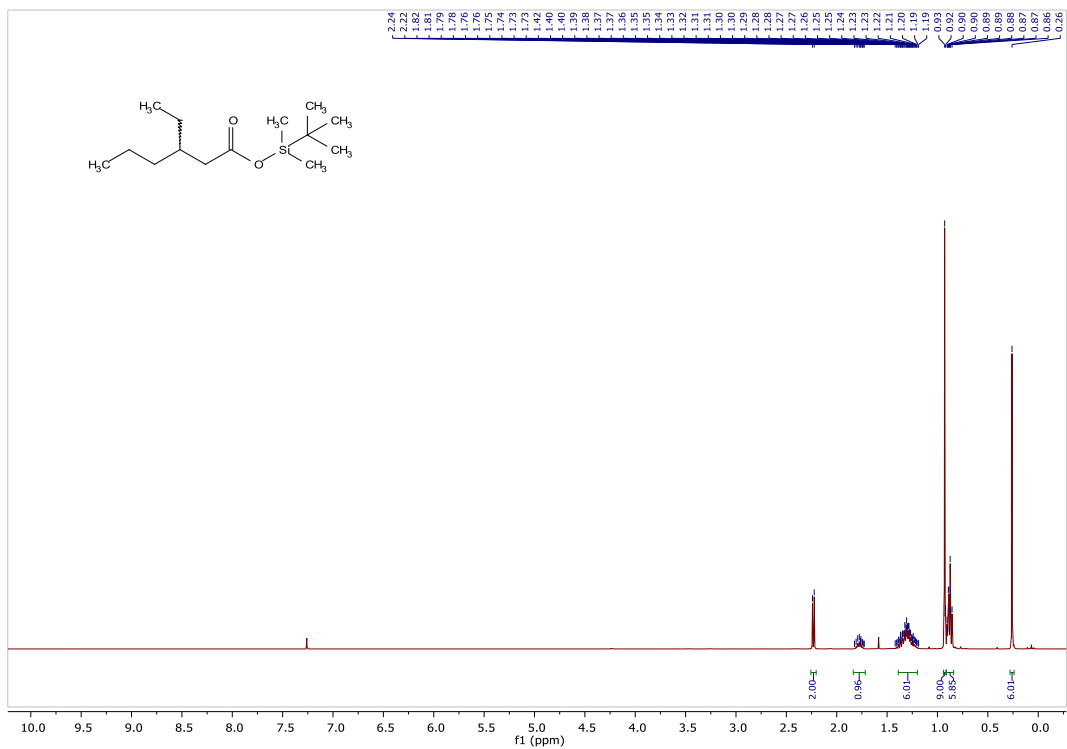

1

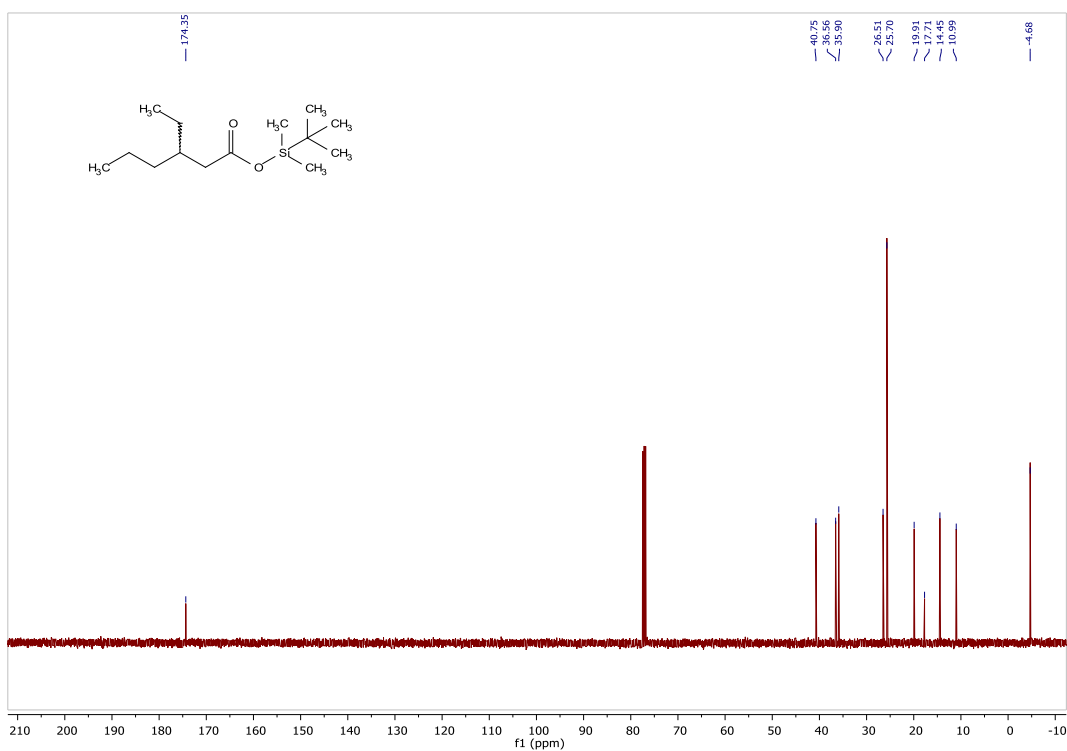

2

3 **Supplementary Figure 43. NMR spectra of *t*-butyldimethylsilyl 3-ethylhexanoate**

4

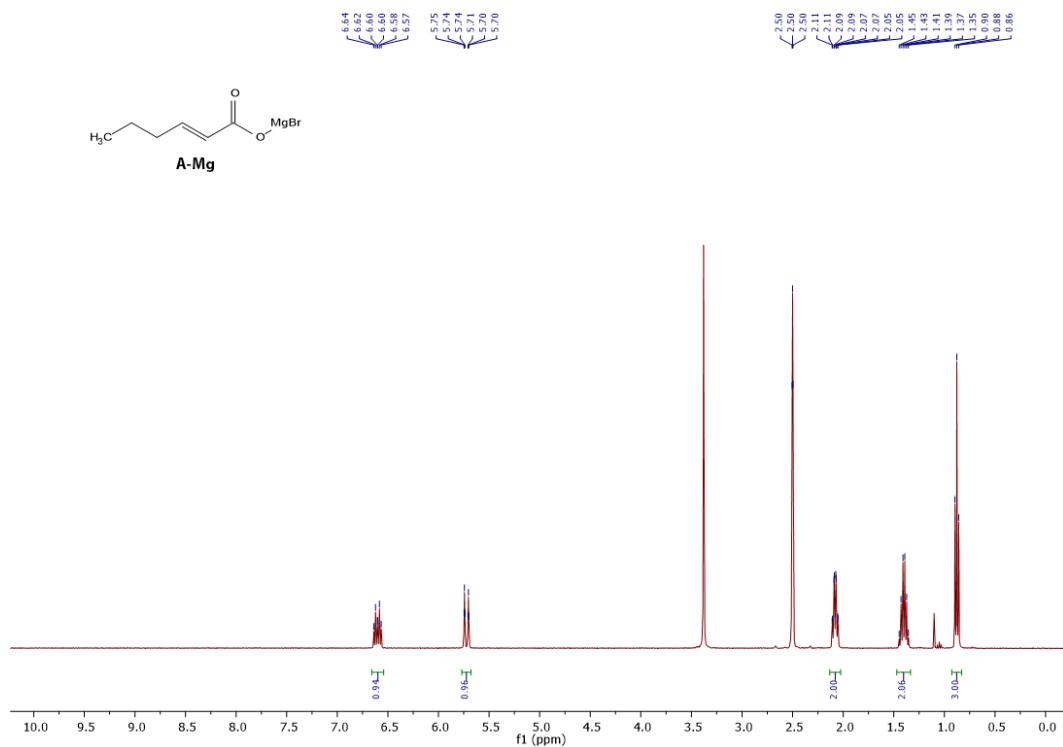

Supplementary Figure 44. <sup>1</sup>H NMR spectrum of magnesium bromide hex-2-enoate (A-Mg)

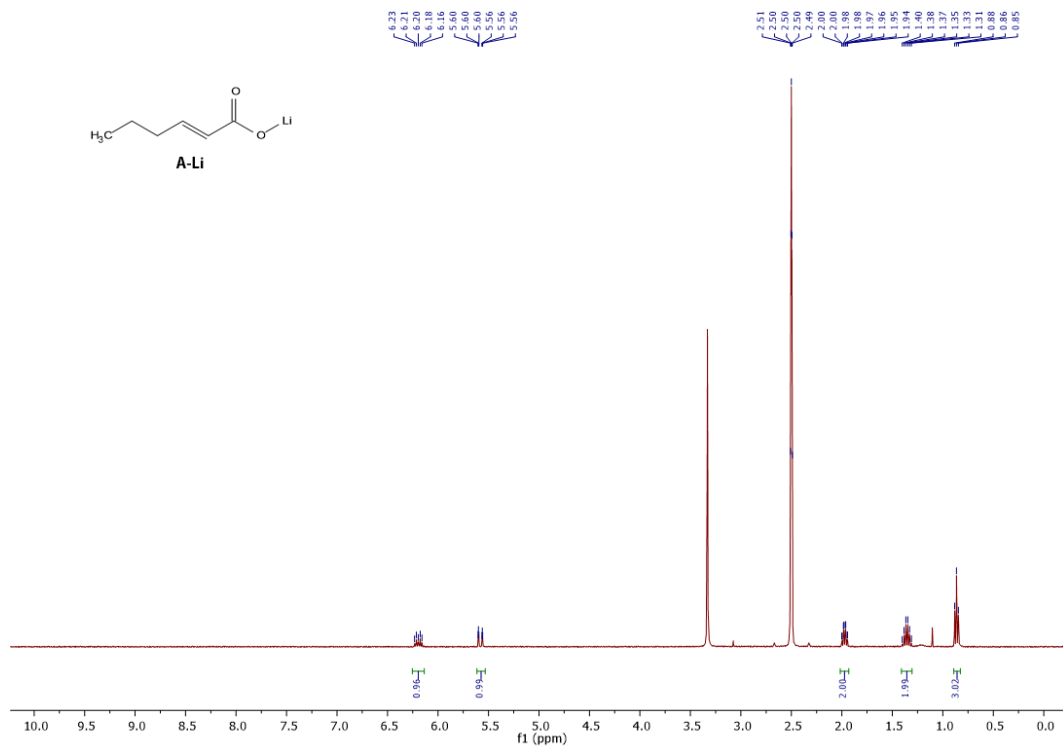

Supplementary Figure 45. <sup>1</sup>H NMR spectrum of lithium hex-2-enoate (A-Li)

1

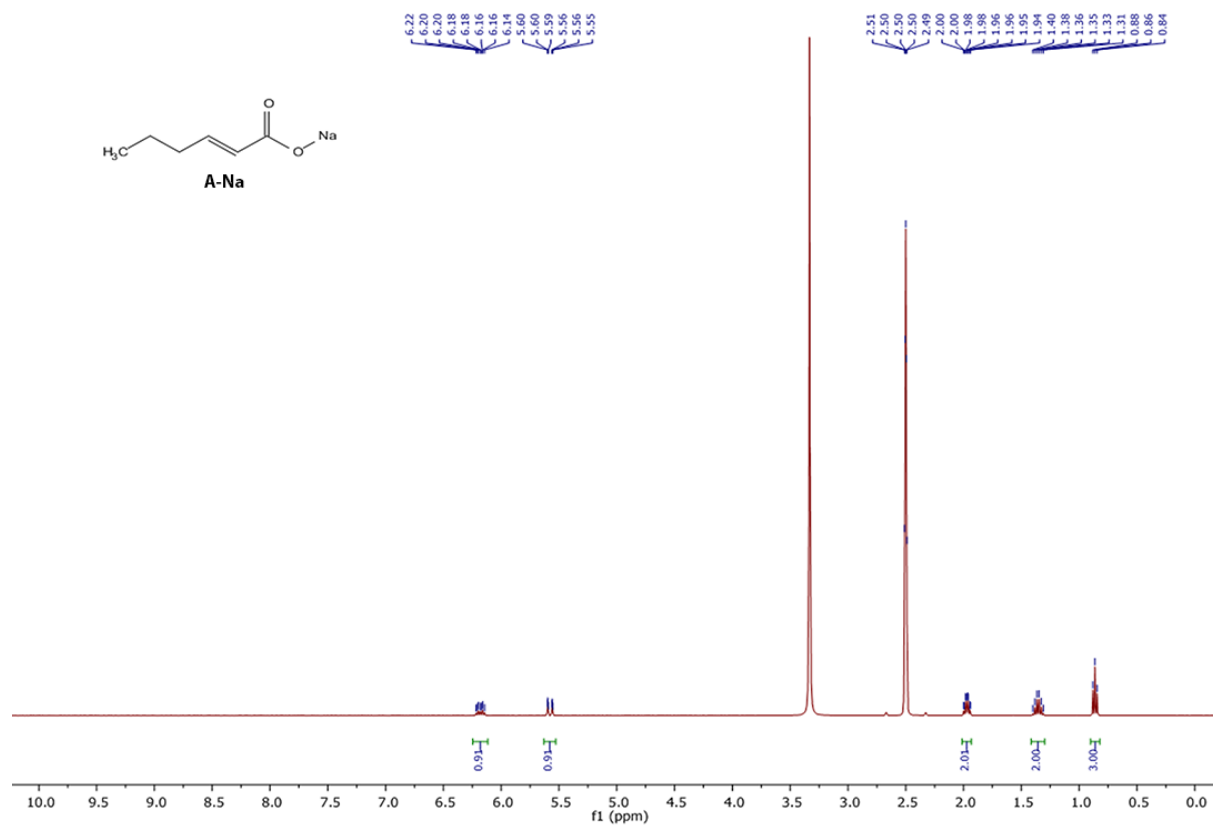

2

3 **Supplementary Figure 46. <sup>1</sup>H NMR spectrum of sodium hex-2-enoate (A-Na)**

4

### Chromatogram

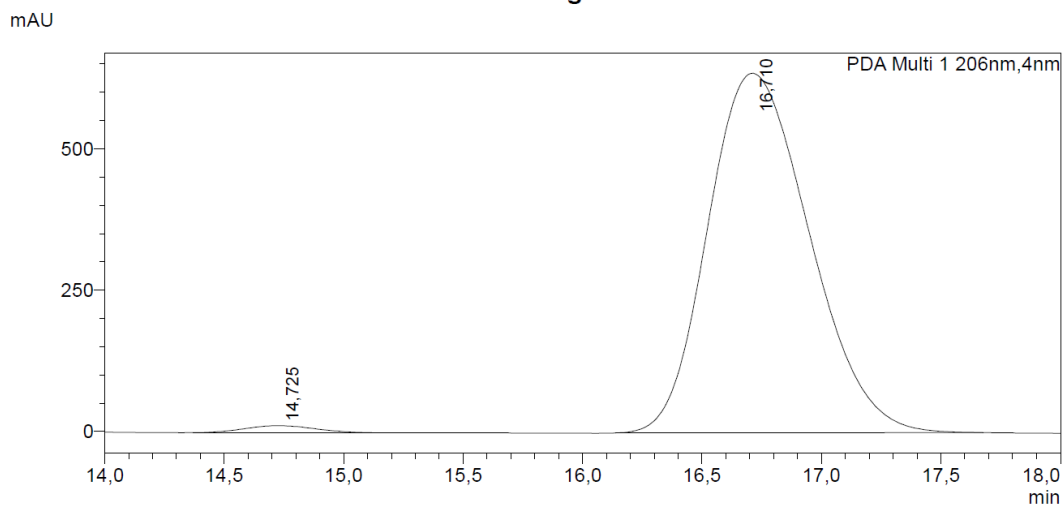

### Peak Table

| PDA Ch1 206nm |           |          |        |        |
|---------------|-----------|----------|--------|--------|
| Peak#         | Ret. Time | Area     | Height | Conc.  |
| 1             | 14,725    | 252249   | 12453  | 1,326  |
| 2             | 16,710    | 18766796 | 635863 | 98,674 |
| Total         |           | 19019046 | 648315 |        |

1

### Chromatogram

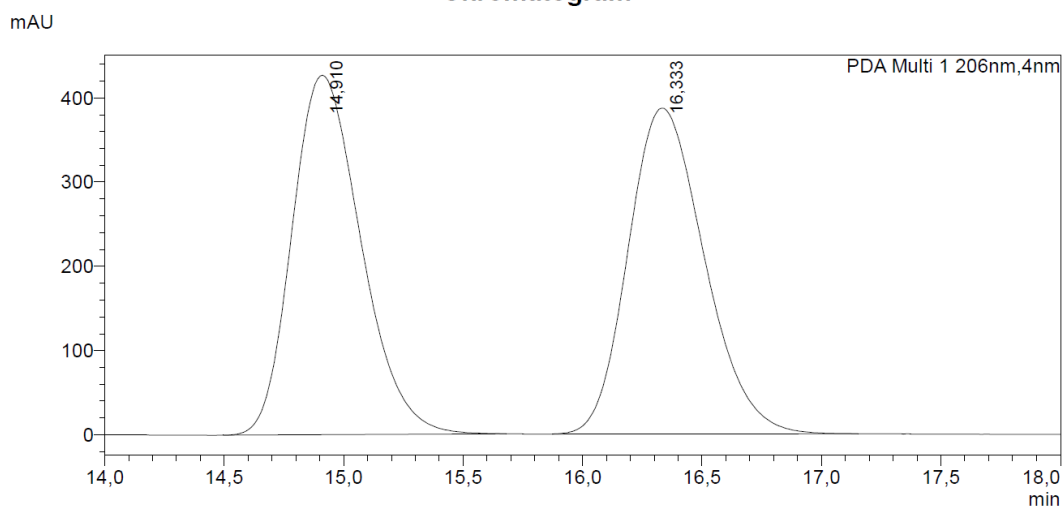

### Peak Table

| PDA Ch1 206nm |           |          |        |        |
|---------------|-----------|----------|--------|--------|
| Peak#         | Ret. Time | Area     | Height | Conc.  |
| 1             | 14,910    | 8571570  | 426940 | 49,943 |
| 2             | 16,333    | 8591130  | 386997 | 50,057 |
| Total         |           | 17162699 | 813937 |        |

2

3 **Supplementary Figure 47. HPLC spectra of (R)-3-Ethylhexanoic acid (2a)**

4

5

### Chromatogram

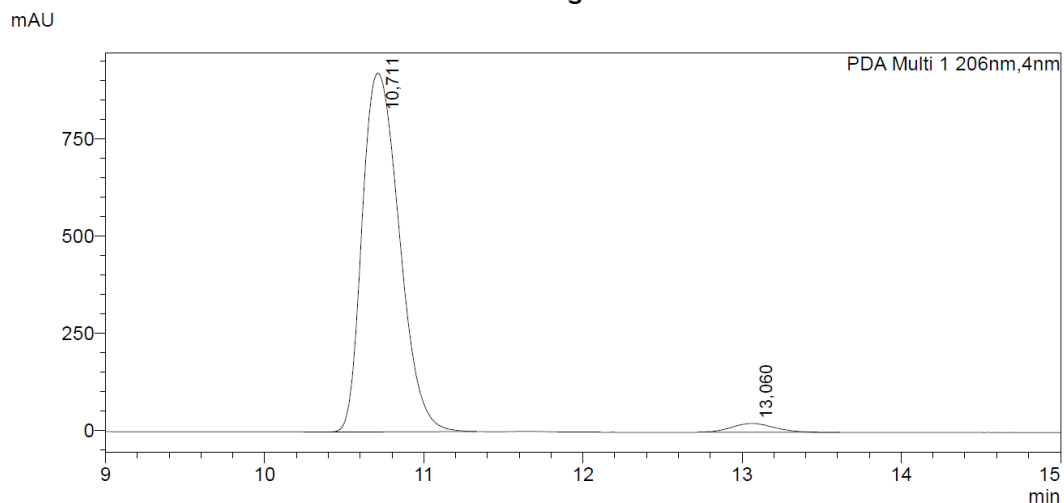

### Peak Table

| PDA Ch1 206nm |           |          |        |        |
|---------------|-----------|----------|--------|--------|
| Peak#         | Ret. Time | Area     | Height | Conc.  |
| 1             | 10.711    | 14933807 | 922838 | 97,357 |
| 2             | 13.060    | 405348   | 22351  | 2,643  |
| Total         |           | 15339155 | 945188 |        |

1

### Chromatogram

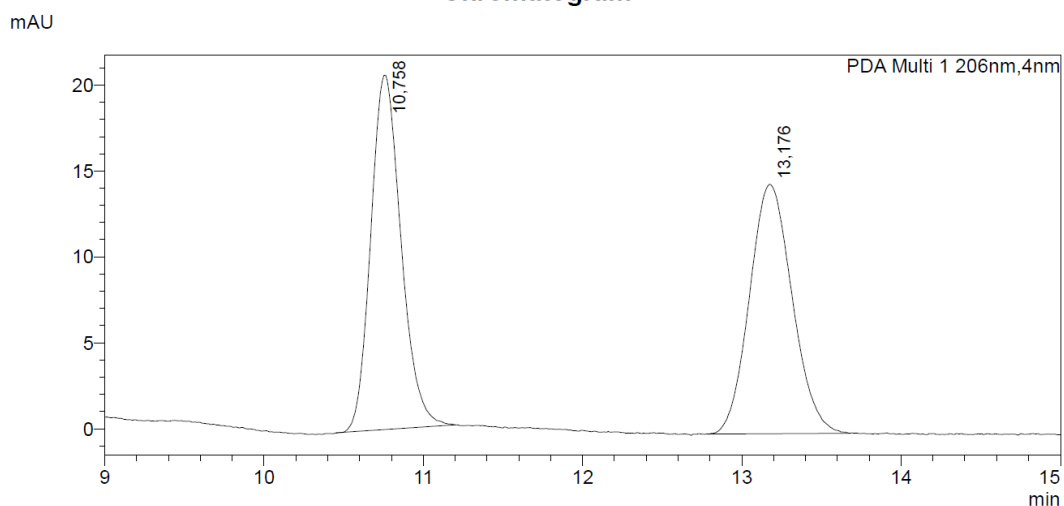

### Peak Table

| PDA Ch1 206nm |           |        |        |        |
|---------------|-----------|--------|--------|--------|
| Peak#         | Ret. Time | Area   | Height | Conc.  |
| 1             | 10.758    | 272780 | 20621  | 50,278 |
| 2             | 13.176    | 269766 | 14512  | 49,722 |
| Total         |           | 542546 | 35133  |        |

2

3 **Supplementary Figure 48. HPLC spectra of (S)-3-Methylpentanoic acid (2b)**

4

5

### Chromatogram

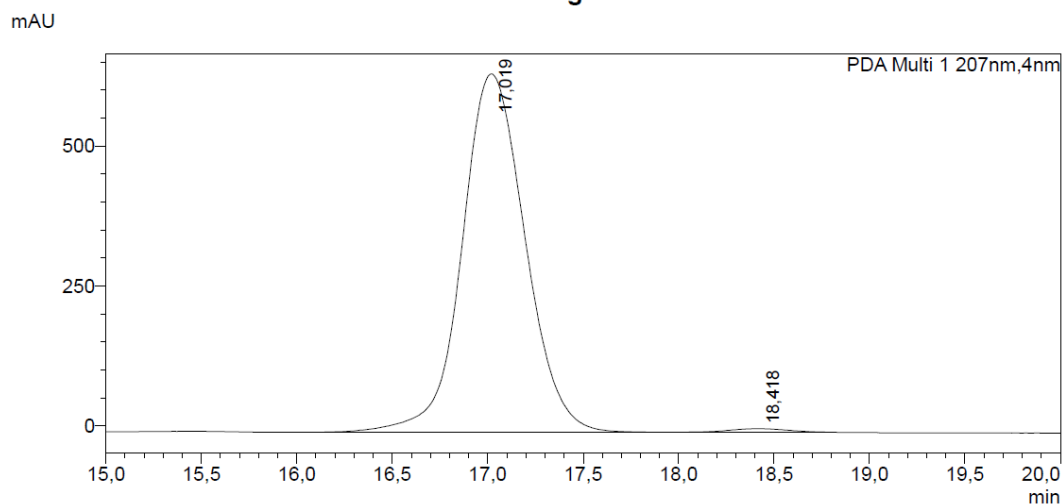

### Peak Table

| PDA Ch1 207nm |           |          |        |        |
|---------------|-----------|----------|--------|--------|
| Peak#         | Ret. Time | Area     | Height | Conc.  |
| 1             | 17,019    | 14684549 | 639645 | 99,088 |
| 2             | 18,418    | 135167   | 6522   | 0,912  |
| Total         |           | 14819716 | 646167 |        |

1

### Chromatogram

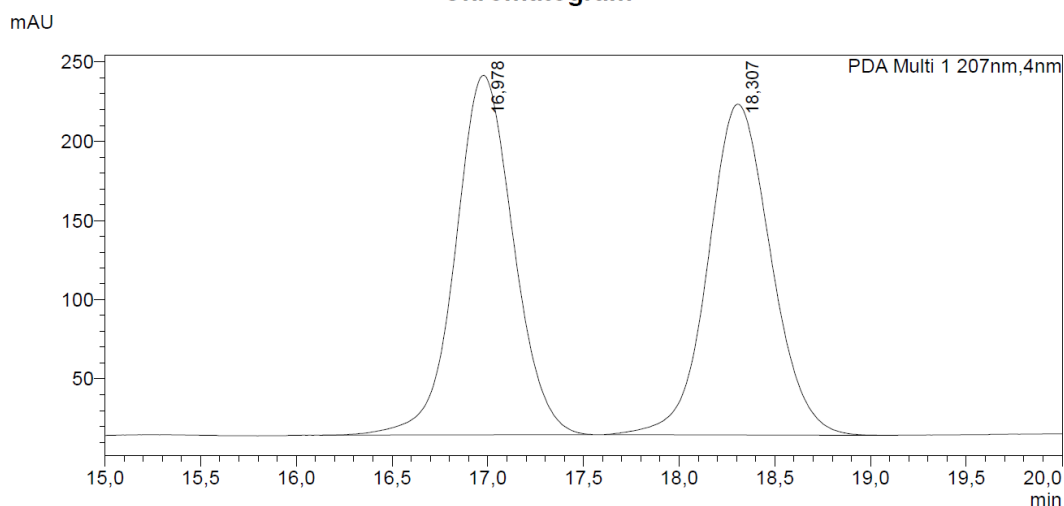

### Peak Table

| PDA Ch1 207nm |           |         |        |        |
|---------------|-----------|---------|--------|--------|
| Peak#         | Ret. Time | Area    | Height | Conc.  |
| 1             | 16,978    | 4779732 | 227050 | 50,070 |
| 2             | 18,307    | 4766307 | 208865 | 49,930 |
| Total         |           | 9546039 | 435915 |        |

2

3 **Supplementary Figure 49. HPLC spectra of (S)-3-Cyclohexylpentanoic acid (2c)**

4

5



### Chromatogram

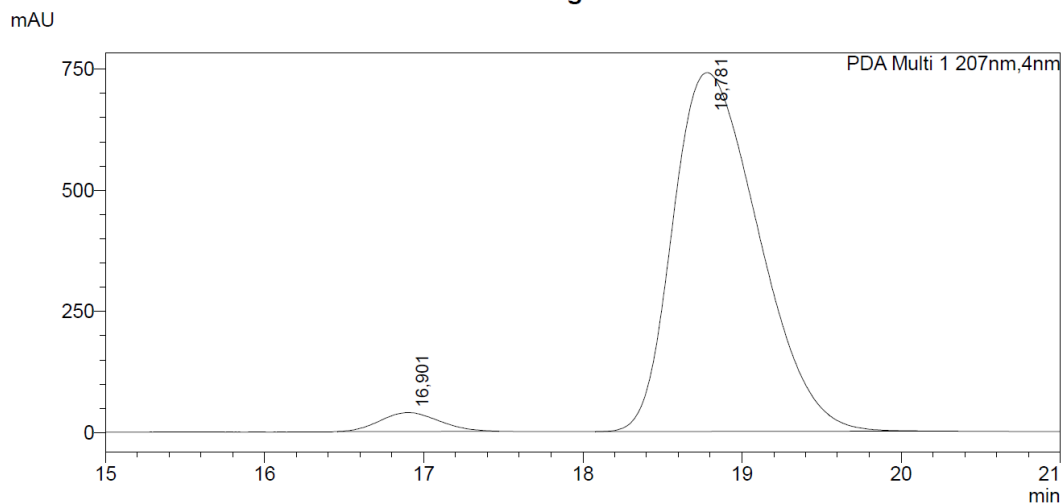

### Peak Table

| PDA Ch1 207nm |           |          |        |        |
|---------------|-----------|----------|--------|--------|
| Peak#         | Ret. Time | Area     | Height | Conc.  |
| 1             | 16,901    | 998511   | 38749  | 3,480  |
| 2             | 18,781    | 27692170 | 739786 | 96,520 |
| Total         |           | 28690682 | 778535 |        |

1

### Chromatogram

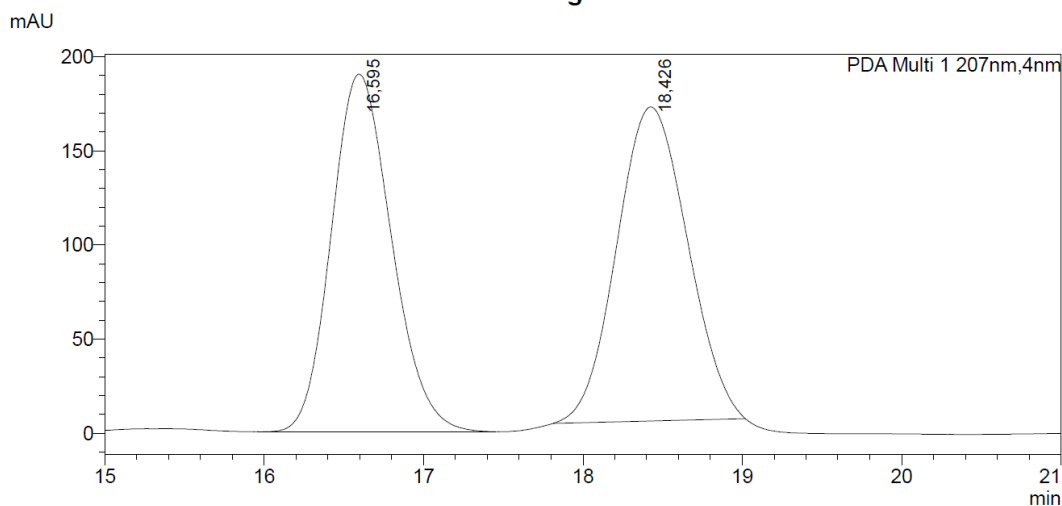

### Peak Table

| PDA Ch1 207nm |           |          |        |        |
|---------------|-----------|----------|--------|--------|
| Peak#         | Ret. Time | Area     | Height | Conc.  |
| 1             | 16,595    | 4981287  | 190027 | 49,174 |
| 2             | 18,426    | 5148698  | 166796 | 50,826 |
| Total         |           | 10129986 | 356823 |        |

2

3 **Supplementary Figure 50. HPLC spectra of (S)-3-Cyclopropylpentanoic acid (2d)**

4

5

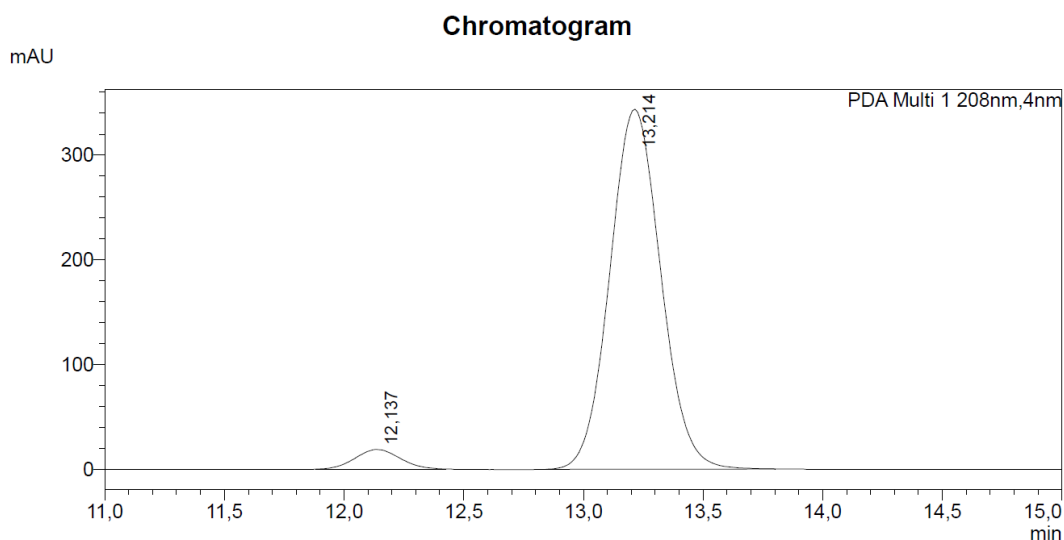

**Peak Table**

| PDA Ch1 208nm |           |         |        |        |
|---------------|-----------|---------|--------|--------|
| Peak#         | Ret. Time | Area    | Height | Conc.  |
| 1             | 12,137    | 244091  | 18750  | 4,568  |
| 2             | 13,214    | 5098947 | 343902 | 95,432 |
| Total         |           | 5343038 | 362652 |        |

1

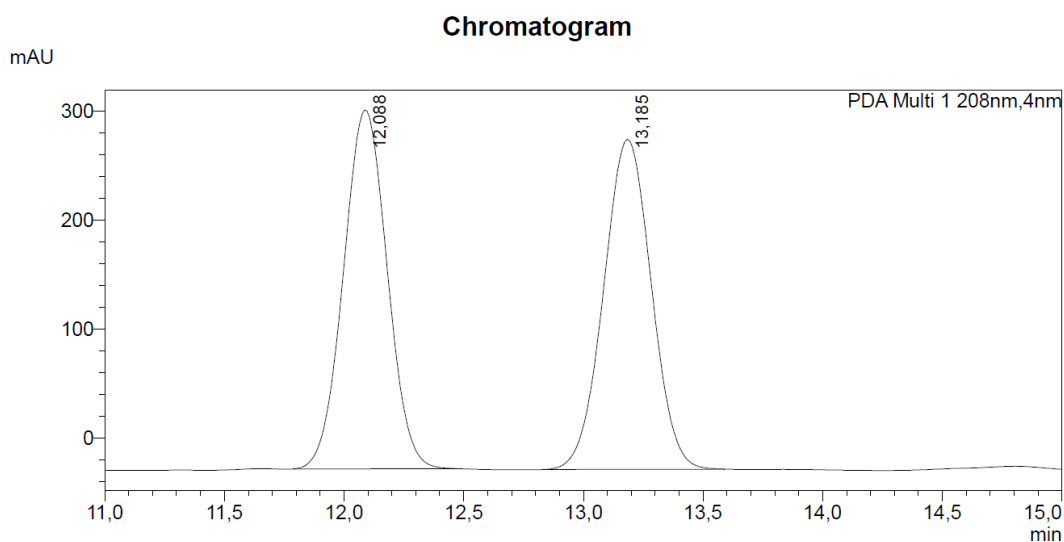

**Peak Table**

| PDA Ch1 208nm |           |         |        |        |
|---------------|-----------|---------|--------|--------|
| Peak#         | Ret. Time | Area    | Height | Conc.  |
| 1             | 12,088    | 4186813 | 329363 | 49,939 |
| 2             | 13,185    | 4197003 | 302801 | 50,061 |
| Total         |           | 8383816 | 632165 |        |

2

3 **Supplementary Figure 51. HPLC spectra of (*R*)-3-Phenylpentanoic acid (2e)**

4

5

### Chromatogram

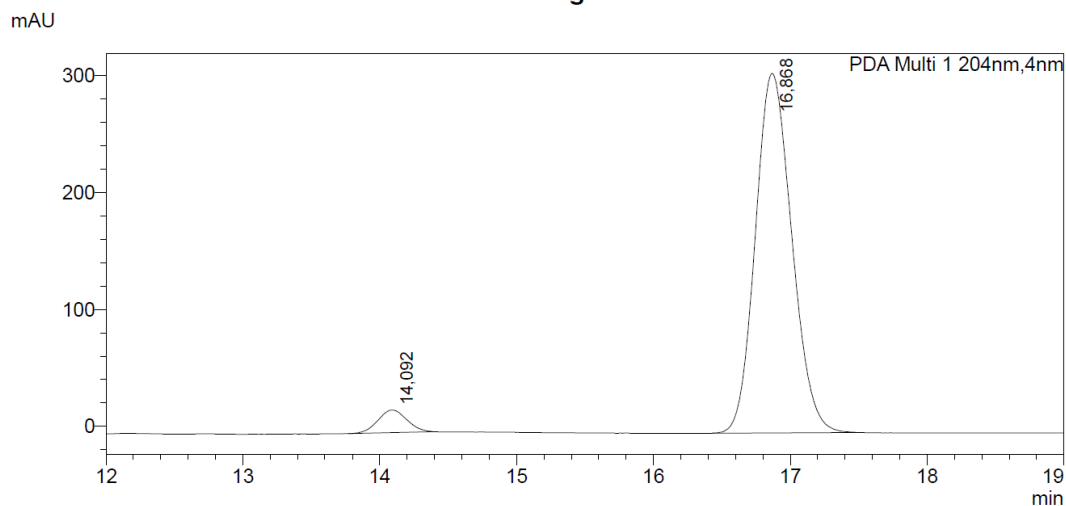

### Peak Table

| PDA Ch1 204nm |           |         |        |        |
|---------------|-----------|---------|--------|--------|
| Peak#         | Ret. Time | Area    | Height | Conc.  |
| 1             | 14,092    | 281915  | 19290  | 4,719  |
| 2             | 16,868    | 5692649 | 307484 | 95,281 |
| Total         |           | 5974564 | 326775 |        |

1

### Chromatogram

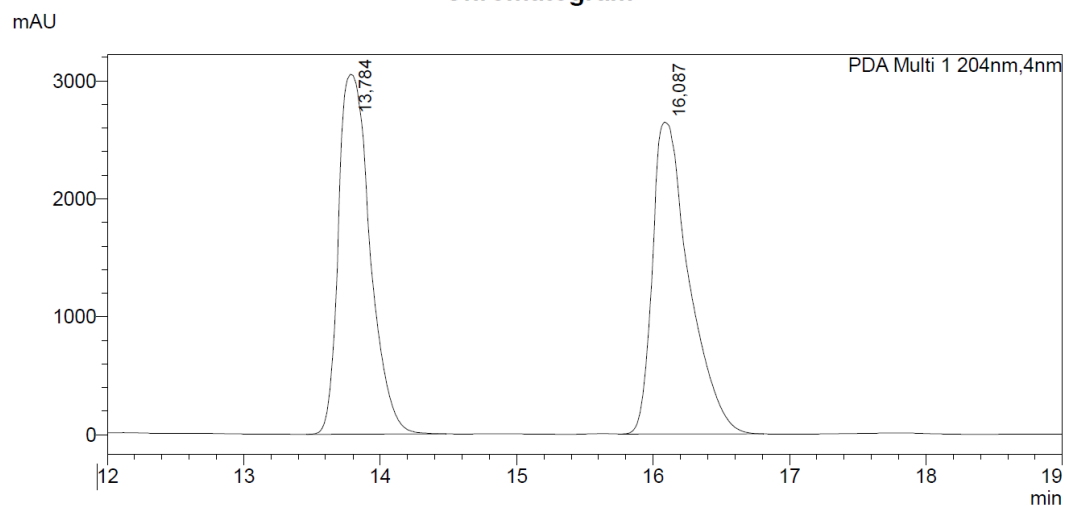

### Peak Table

| PDA Ch1 204nm |           |          |         |        |
|---------------|-----------|----------|---------|--------|
| Peak#         | Ret. Time | Area     | Height  | Conc.  |
| 1             | 13,784    | 49000761 | 3048491 | 49,854 |
| 2             | 16,087    | 49287705 | 2642449 | 50,146 |
| Total         |           | 98288466 | 5690940 |        |

2

3 **Supplementary Figure 52. HPLC spectra of (R)-3-(4-Methoxyphenyl)pentanoic acid (2f)**

4

5

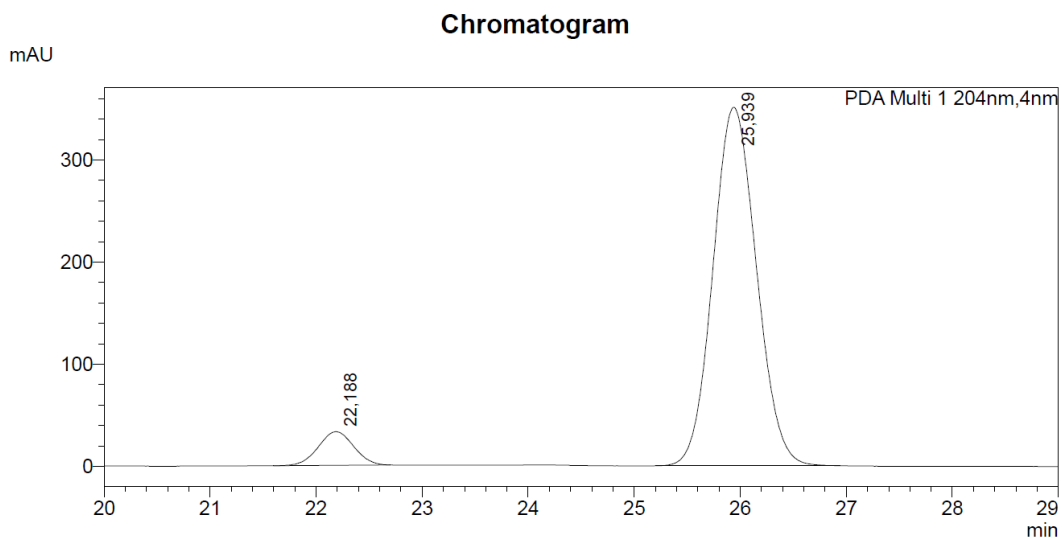

**Peak Table**

| PDA Ch1 204nm |           |          |        |        |
|---------------|-----------|----------|--------|--------|
| Peak#         | Ret. Time | Area     | Height | Conc.  |
| 1             | 22,188    | 766731   | 32984  | 7,117  |
| 2             | 25,939    | 10005850 | 350960 | 92,883 |
| Total         |           | 10772582 | 383943 |        |

1

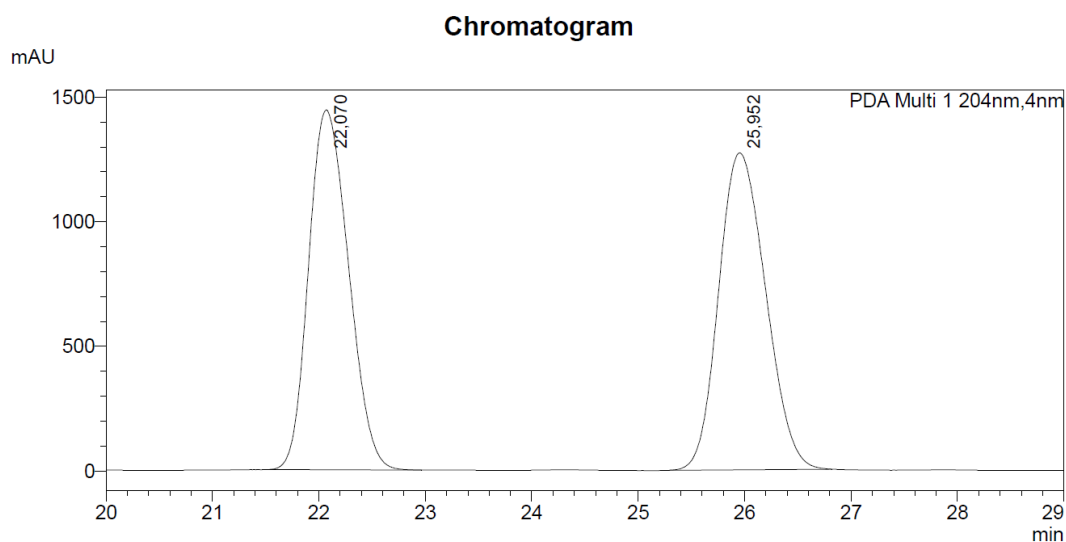

**Peak Table**

| PDA Ch1 204nm |           |          |         |        |
|---------------|-----------|----------|---------|--------|
| Peak#         | Ret. Time | Area     | Height  | Conc.  |
| 1             | 22,070    | 37750765 | 1445439 | 49,138 |
| 2             | 25,952    | 39075786 | 1272701 | 50,862 |
| Total         |           | 76826551 | 2718139 |        |

2

3 **Supplementary Figure 53. HPLC spectra of (R)-3-(3-Bromophenyl)pentanoic acid (2g)**

4

5

### Chromatogram

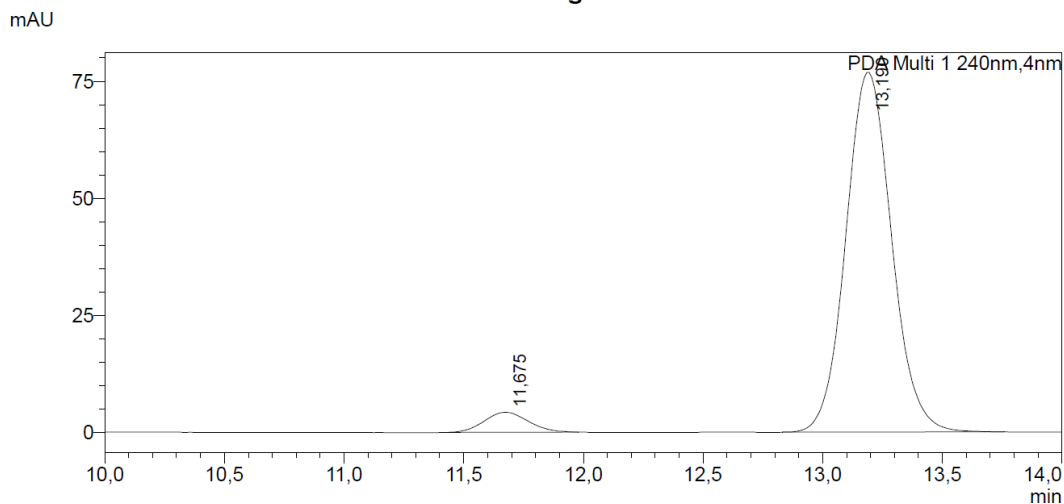

### Peak Table

| PDA Ch1 240nm |           |         |        |        |
|---------------|-----------|---------|--------|--------|
| Peak#         | Ret. Time | Area    | Height | Conc.  |
| 1             | 11,675    | 54697   | 4274   | 5,078  |
| 2             | 13,190    | 1022339 | 76748  | 94,922 |
| Total         |           | 1077035 | 81022  |        |

1

### Chromatogram

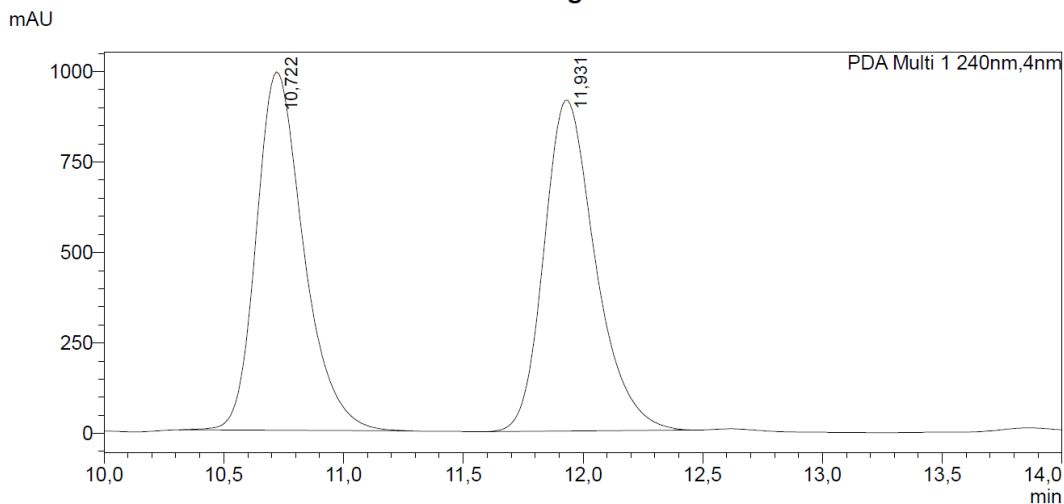

### Peak Table

| PDA Ch1 240nm |           |          |         |        |
|---------------|-----------|----------|---------|--------|
| Peak#         | Ret. Time | Area     | Height  | Conc.  |
| 1             | 10,722    | 13621413 | 990455  | 49,906 |
| 2             | 11,931    | 13672603 | 914292  | 50,094 |
| Total         |           | 27294016 | 1904747 |        |

2

3 **Supplementary Figure 54. HPLC spectra of (R)-3-(Thiophen-2-yl)pentanoic acid (2h)**

4

5

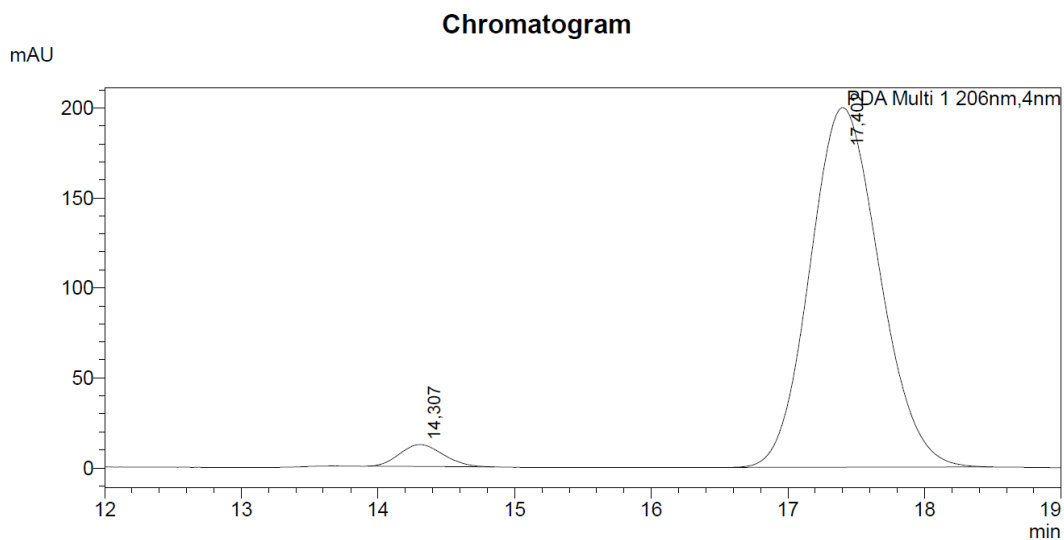

**Peak Table**

| PDA Ch1 206nm |           |         |        |        |
|---------------|-----------|---------|--------|--------|
| Peak#         | Ret. Time | Area    | Height | Conc.  |
| 1             | 14,307    | 269126  | 12175  | 3,672  |
| 2             | 17,402    | 7059714 | 199844 | 96,328 |
| Total         |           | 7328841 | 212020 |        |

1

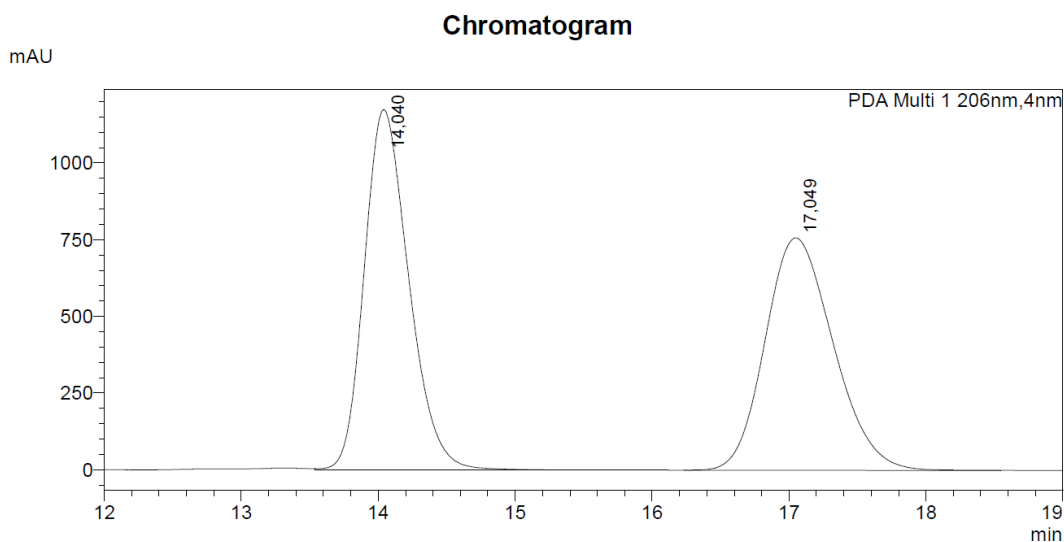

**Peak Table**

| PDA Ch1 206nm |           |          |         |        |
|---------------|-----------|----------|---------|--------|
| Peak#         | Ret. Time | Area     | Height  | Conc.  |
| 1             | 14,040    | 26626496 | 1174817 | 50,433 |
| 2             | 17,049    | 26169539 | 757431  | 49,567 |
| Total         |           | 52796035 | 1932248 |        |

2

3 **Supplementary Figure 55. HPLC spectra of (R)-3-(Thiophen-3-yl)pentanoic acid (2i)**

4

5

### Chromatogram

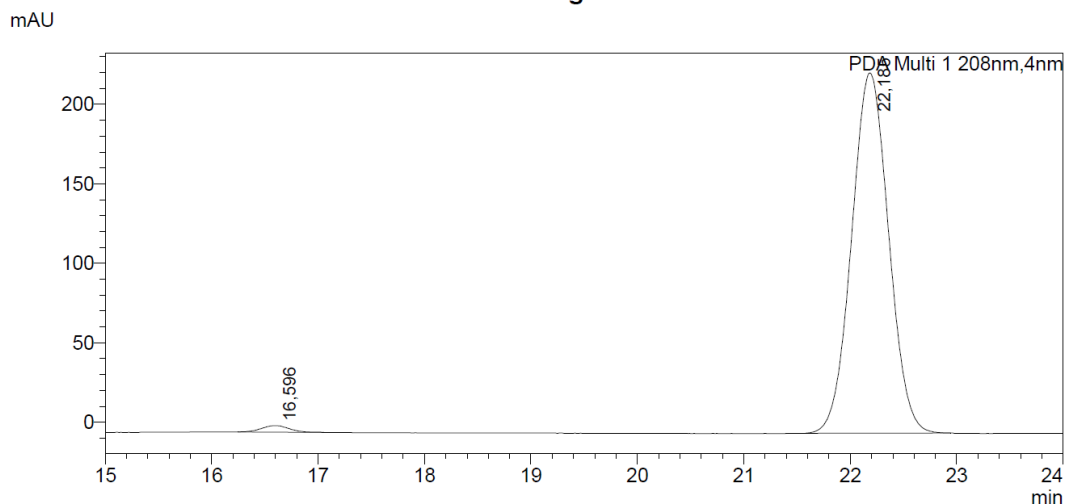

### Peak Table

| PDA Ch1 208nm |           |         |        |        |
|---------------|-----------|---------|--------|--------|
| Peak#         | Ret. Time | Area    | Height | Conc.  |
| 1             | 16,596    | 73330   | 4133   | 1,320  |
| 2             | 22,185    | 5481356 | 226795 | 98,680 |
| Total         |           | 5554686 | 230928 |        |

1

### Chromatogram

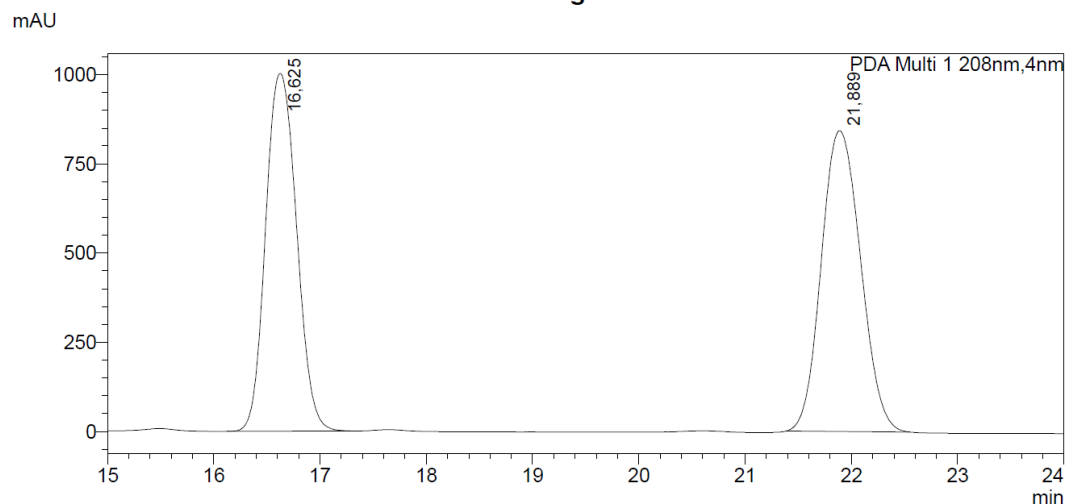

### Peak Table

| PDA Ch1 208nm |           |          |         |        |
|---------------|-----------|----------|---------|--------|
| Peak#         | Ret. Time | Area     | Height  | Conc.  |
| 1             | 16,625    | 20324527 | 1002704 | 48,374 |
| 2             | 21,889    | 21690595 | 843175  | 51,626 |
| Total         |           | 42015123 | 1845879 |        |

2

3 **Supplementary Figure 56. HPLC spectra of (R)-3-Benzylpentanoic acid (2j)**

4

5

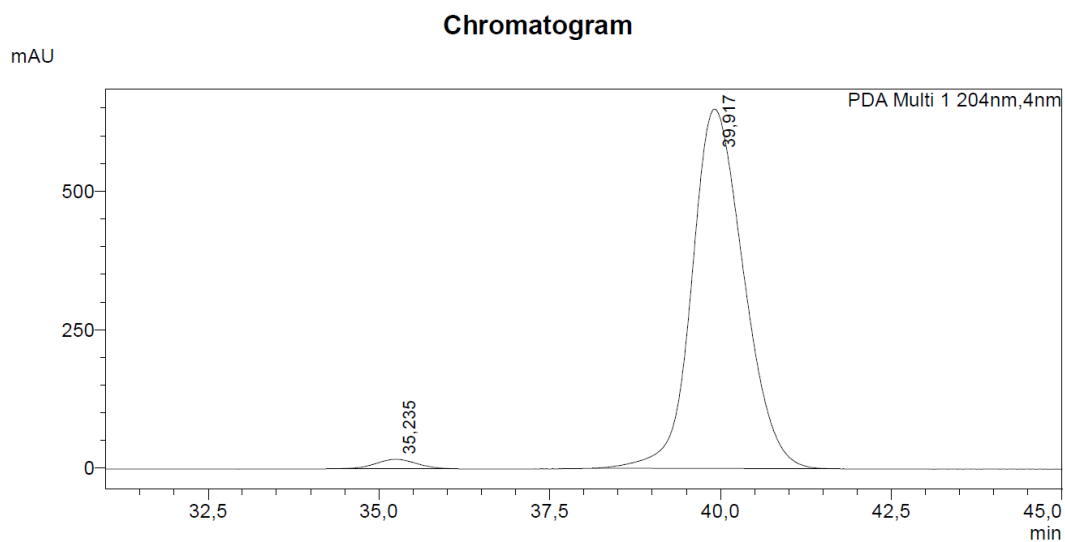

**Peak Table**

| PDA Ch1 204nm |           |          |        |        |
|---------------|-----------|----------|--------|--------|
| Peak#         | Ret. Time | Area     | Height | Conc.  |
| 1             | 35,235    | 698942   | 16981  | 2,000  |
| 2             | 39,917    | 34240886 | 648271 | 98,000 |
| Total         |           | 34939828 | 665251 |        |

1

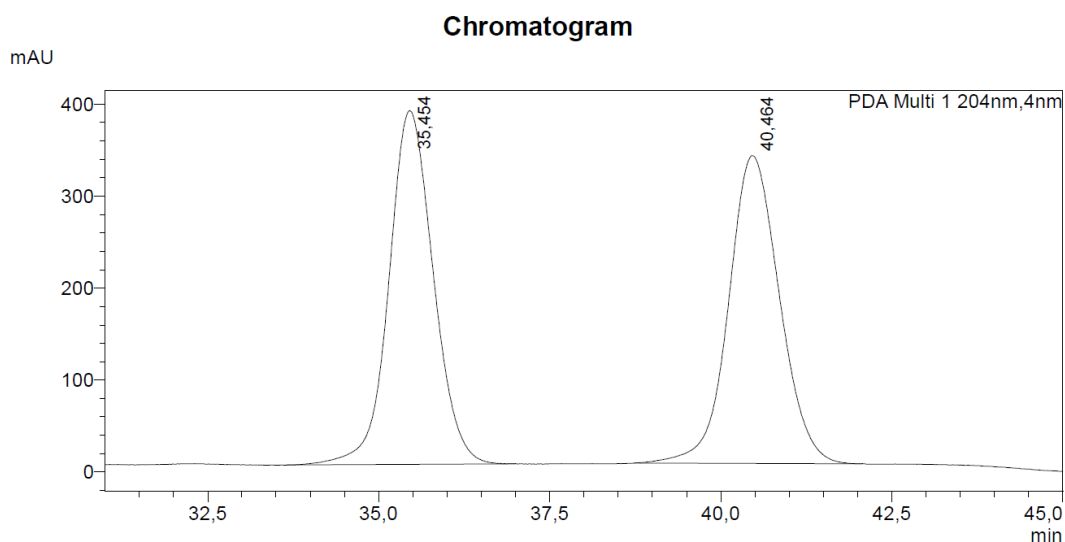

**Peak Table**

| PDA Ch1 204nm |           |          |        |        |
|---------------|-----------|----------|--------|--------|
| Peak#         | Ret. Time | Area     | Height | Conc.  |
| 1             | 35,454    | 17376687 | 384612 | 50,040 |
| 2             | 40,464    | 17348746 | 334750 | 49,960 |
| Total         |           | 34725433 | 719362 |        |

2

3 **Supplementary Figure 57. HPLC spectra of (R)-3-(4-Methoxybenzyl)pentanoic acid**  
 4 **(2k)**

5

6



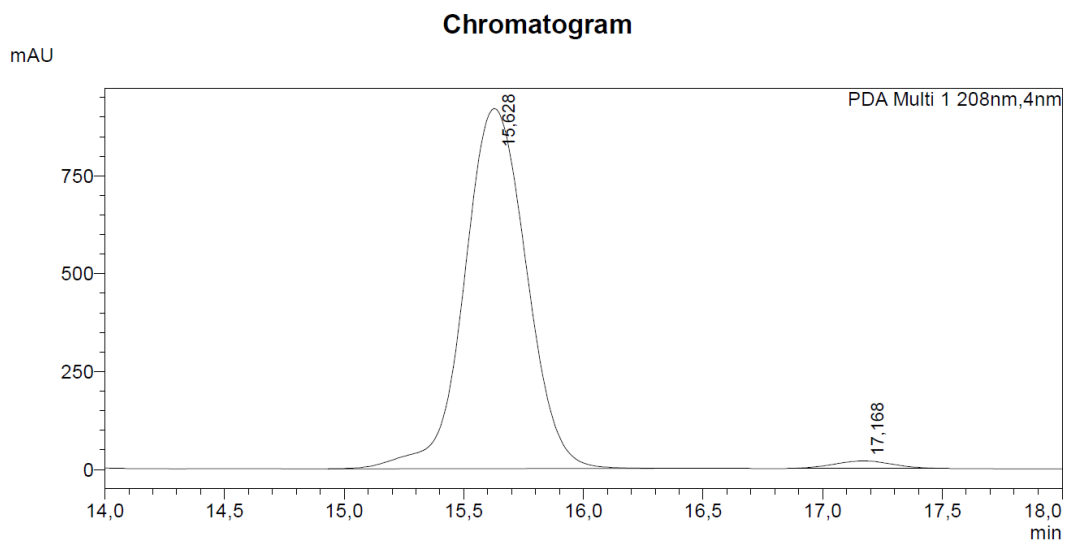

**Peak Table**

| PDA Ch1 208nm |           |          |        |        |
|---------------|-----------|----------|--------|--------|
| Peak#         | Ret. Time | Area     | Height | Conc.  |
| 1             | 15,628    | 16587899 | 919627 | 98,126 |
| 2             | 17,168    | 316867   | 18866  | 1,874  |
| Total         |           | 16904766 | 938493 |        |

1

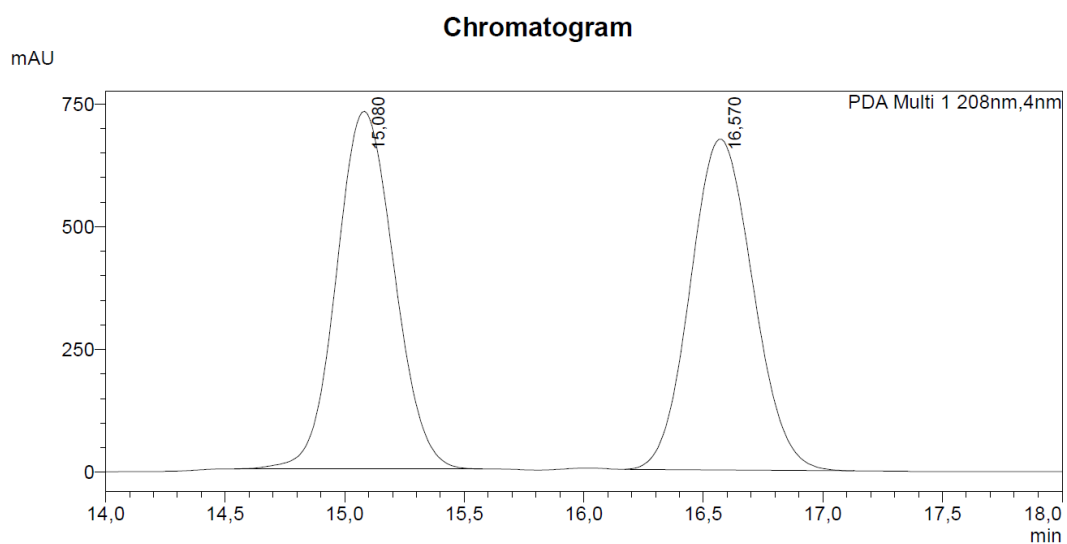

**Peak Table**

| PDA Ch1 208nm |           |          |         |        |
|---------------|-----------|----------|---------|--------|
| Peak#         | Ret. Time | Area     | Height  | Conc.  |
| 1             | 15,080    | 12227202 | 728388  | 49,808 |
| 2             | 16,570    | 12321328 | 674015  | 50,192 |
| Total         |           | 24548530 | 1402403 |        |

2

3 **Supplementary Figure 58. HPLC spectra of (R)-6-Bromo-3-ethylhexanoic acid (21)**

4

5

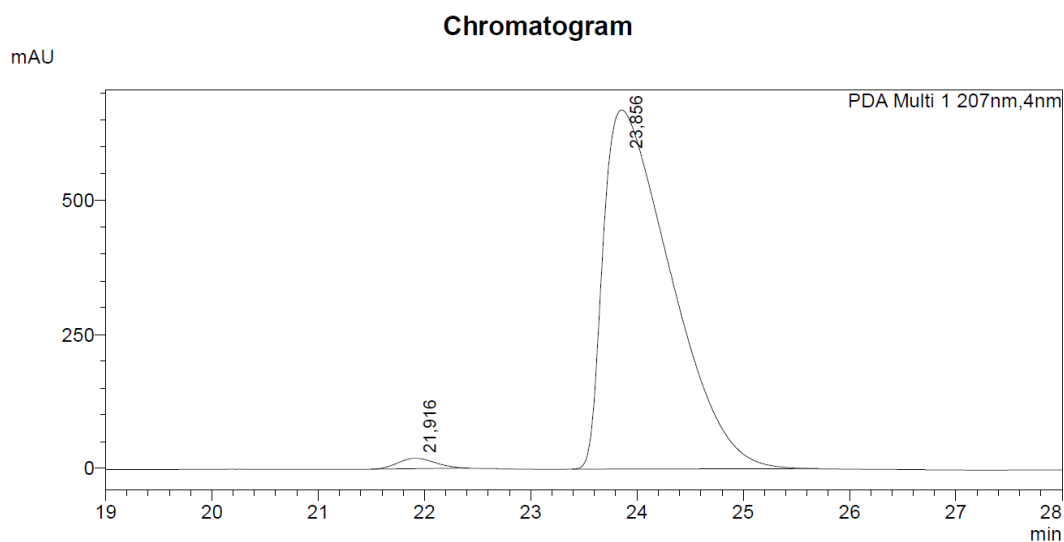

**Peak Table**

| PDA Ch1 207nm |           |          |        |        |
|---------------|-----------|----------|--------|--------|
| Peak#         | Ret. Time | Area     | Height | Conc.  |
| 1             | 21,916    | 475894   | 19523  | 1,583  |
| 2             | 23,856    | 29583722 | 669893 | 98,417 |
| Total         |           | 30059615 | 689417 |        |

1

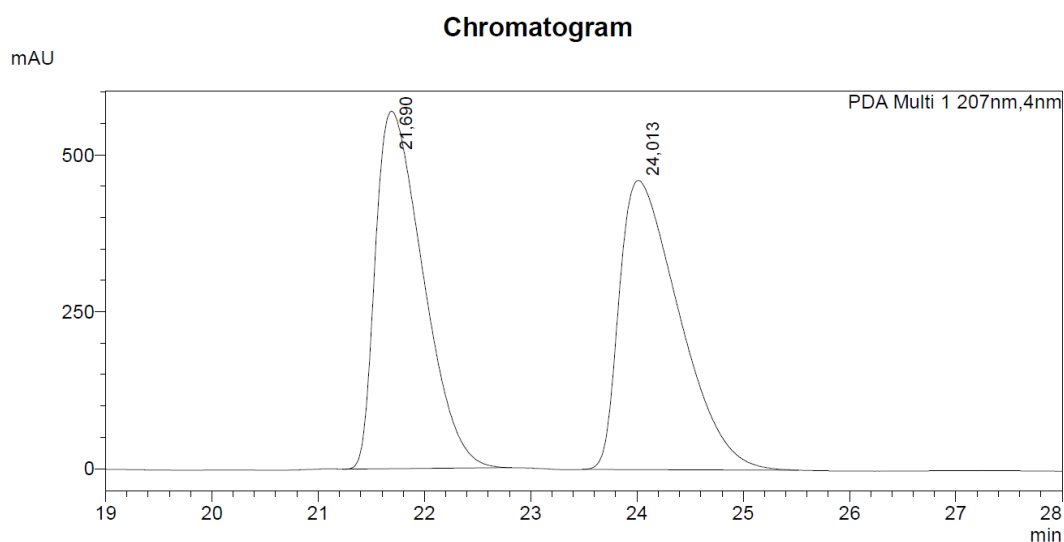

**Peak Table**

| PDA Ch1 207nm |           |          |         |        |
|---------------|-----------|----------|---------|--------|
| Peak#         | Ret. Time | Area     | Height  | Conc.  |
| 1             | 21,690    | 17712426 | 569721  | 49,510 |
| 2             | 24,013    | 18062924 | 460836  | 50,490 |
| Total         |           | 35775349 | 1030557 |        |

2

3 **Supplementary Figure 59. HPLC spectra of (R)-6-Benzyloxy-3-ethylhexanoic acid (2m)**

4

5

### Chromatogram

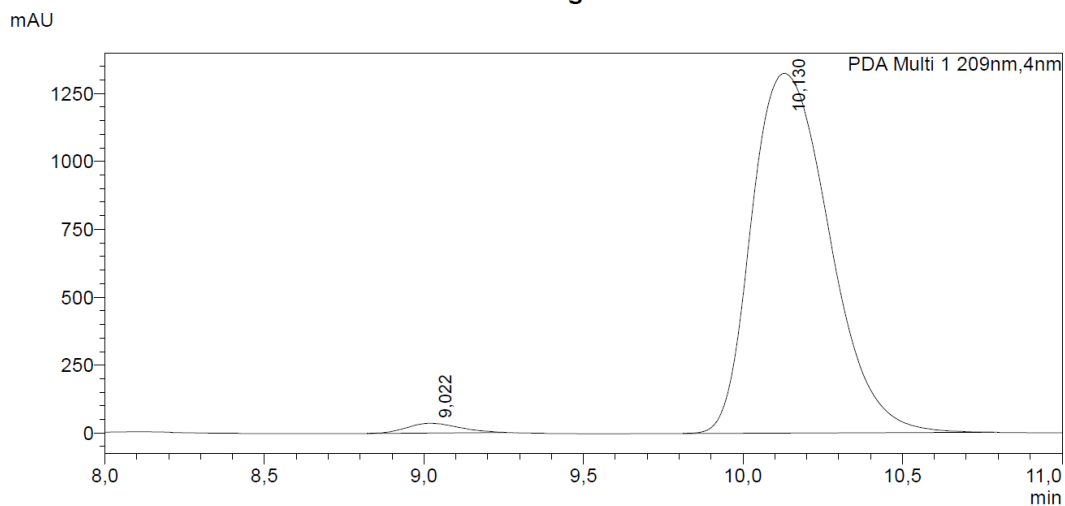

### Peak Table

| PDA Ch1 209nm |           |          |         |        |
|---------------|-----------|----------|---------|--------|
| Peak#         | Ret. Time | Area     | Height  | Conc.  |
| 1             | 9,022     | 407702   | 35896   | 1,785  |
| 2             | 10,130    | 22428761 | 1324754 | 98,215 |
| Total         |           | 22836463 | 1360650 |        |

1

### Chromatogram

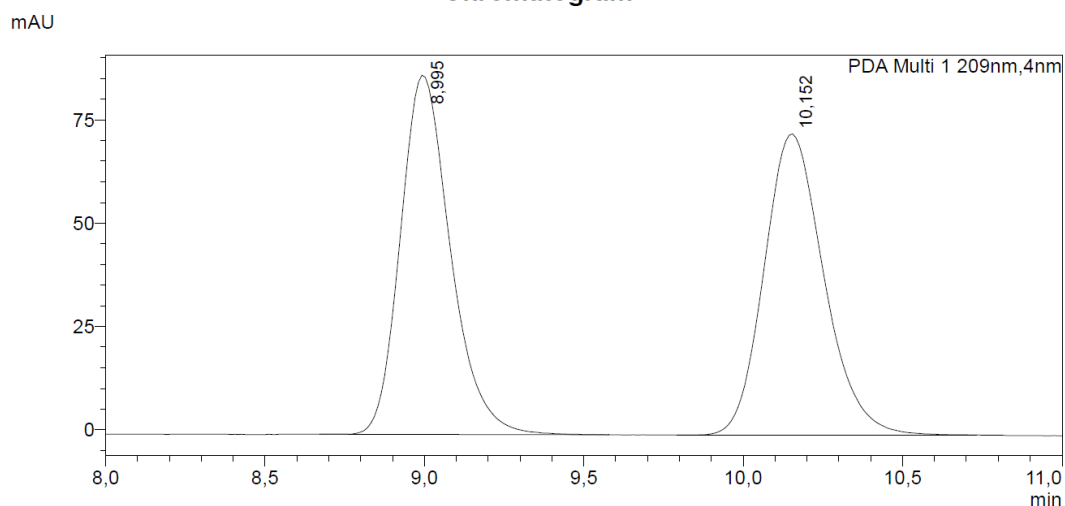

### Peak Table

| PDA Ch1 209nm |           |         |        |        |
|---------------|-----------|---------|--------|--------|
| Peak#         | Ret. Time | Area    | Height | Conc.  |
| 1             | 8,995     | 950533  | 86909  | 49,955 |
| 2             | 10,152    | 952264  | 72869  | 50,045 |
| Total         |           | 1902798 | 159778 |        |

2

3 **Supplementary Figure 60. HPLC spectra of (R)-3-Methylhexanoic acid (3a)**

4

5

### Chromatogram

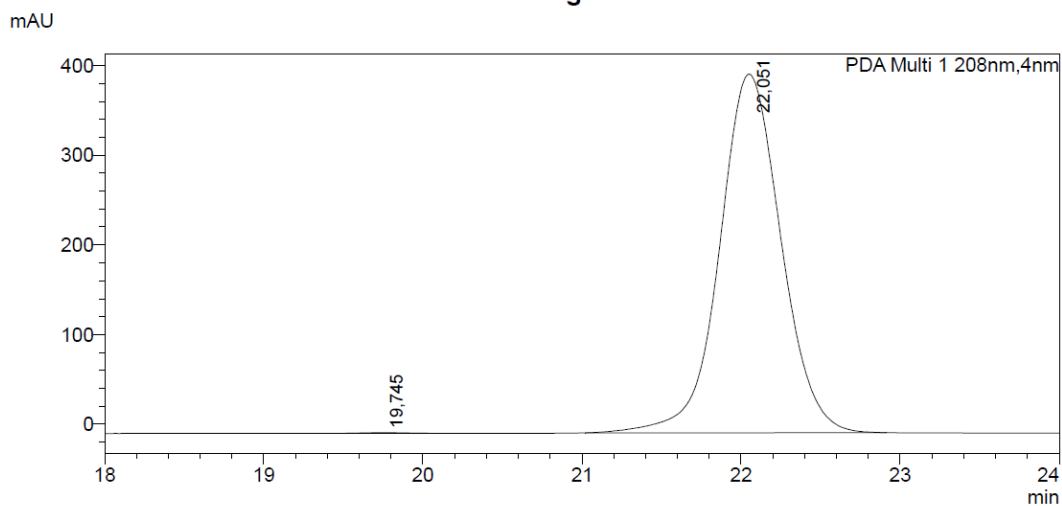

### Peak Table

| PDA Ch1 208nm |           |          |        |        |
|---------------|-----------|----------|--------|--------|
| Peak#         | Ret. Time | Area     | Height | Conc.  |
| 1             | 19,745    | 18052    | 843    | 0,168  |
| 2             | 22,051    | 10745514 | 399869 | 99,832 |
| Total         |           | 10763567 | 400712 |        |

1

### Chromatogram

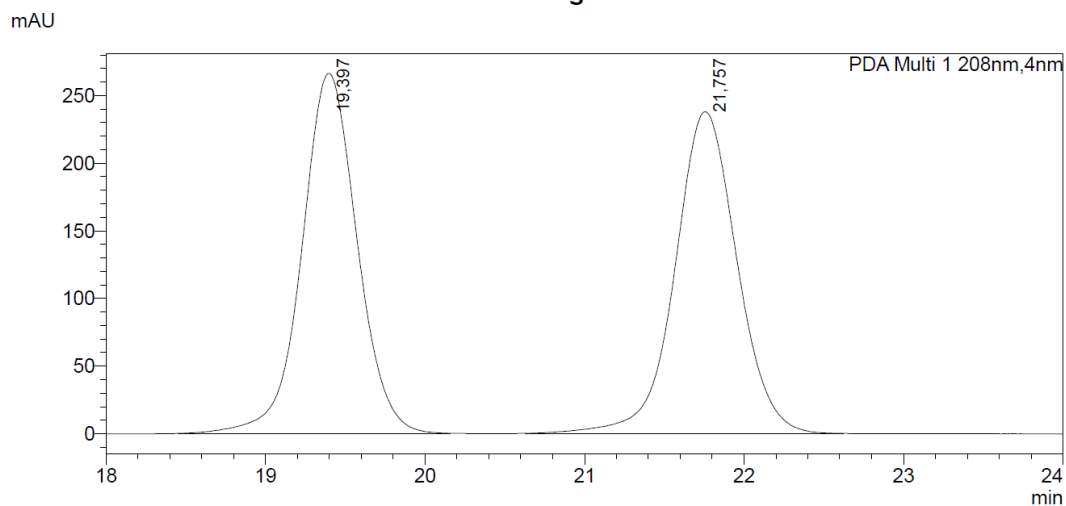

### Peak Table

| PDA Ch1 208nm |           |          |        |        |
|---------------|-----------|----------|--------|--------|
| Peak#         | Ret. Time | Area     | Height | Conc.  |
| 1             | 19,397    | 6393816  | 265935 | 49,848 |
| 2             | 21,757    | 6432839  | 237805 | 50,152 |
| Total         |           | 12826655 | 503739 |        |

2

3 **Supplementary Figure 61. HPLC spectra of (*R*)-3-Phenylbutanoic acid (3b)**

4

5

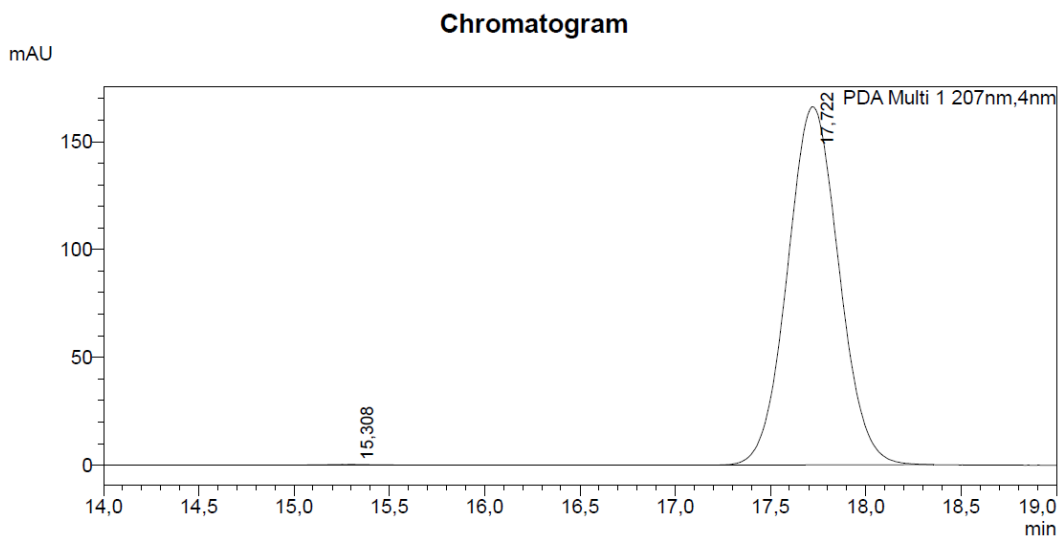

**Peak Table**

| PDA Ch1 207nm |           |         |        |        |
|---------------|-----------|---------|--------|--------|
| Peak#         | Ret. Time | Area    | Height | Conc.  |
| 1             | 15,308    | 4876    | 294    | 0,156  |
| 2             | 17,722    | 3122820 | 166071 | 99,844 |
| Total         |           | 3127697 | 166365 |        |

1

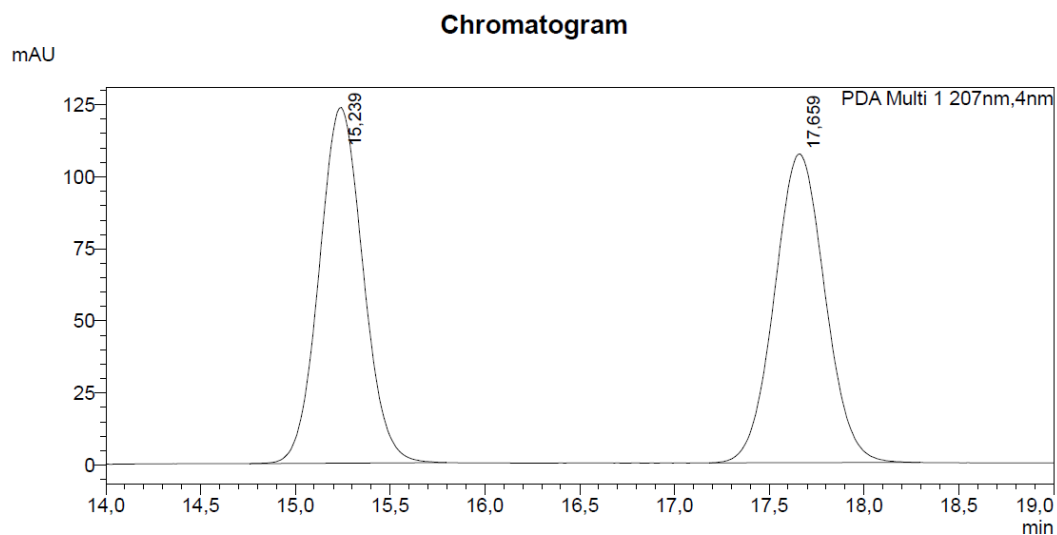

**Peak Table**

| PDA Ch1 207nm |           |         |        |        |
|---------------|-----------|---------|--------|--------|
| Peak#         | Ret. Time | Area    | Height | Conc.  |
| 1             | 15,239    | 1987280 | 123314 | 49,985 |
| 2             | 17,659    | 1988490 | 107025 | 50,015 |
| Total         |           | 3975771 | 230340 |        |

2

3 **Supplementary Figure 62. HPLC spectra of (R)-3-(4-Methylphenyl)butanoic acid (3c)**

4

5

### Chromatogram

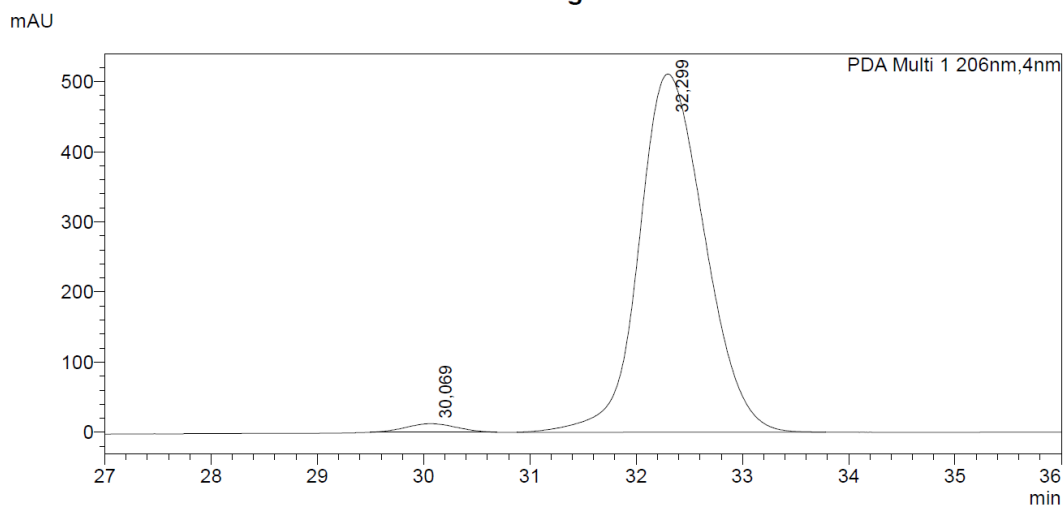

### Peak Table

| PDA Ch1 206nm |           |          |        |        |
|---------------|-----------|----------|--------|--------|
| Peak#         | Ret. Time | Area     | Height | Conc.  |
| 1             | 30,069    | 406825   | 12247  | 1,821  |
| 2             | 32,299    | 21930234 | 510376 | 98,179 |
| Total         |           | 22337059 | 522623 |        |

1

### Chromatogram

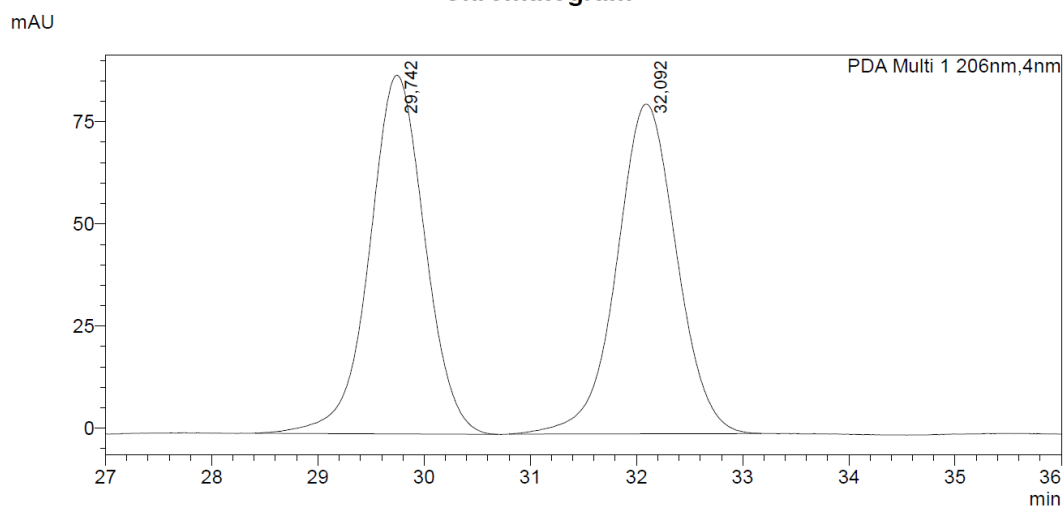

### Peak Table

| PDA Ch1 206nm |           |         |        |        |
|---------------|-----------|---------|--------|--------|
| Peak#         | Ret. Time | Area    | Height | Conc.  |
| 1             | 29,742    | 3183843 | 87789  | 50,107 |
| 2             | 32,092    | 3170301 | 80666  | 49,893 |
| Total         |           | 6354144 | 168455 |        |

2

3 **Supplementary Figure 63. HPLC spectra of (R)-3-Cyclopentylhexanoic acid (3d)**

4

5

### Chromatogram

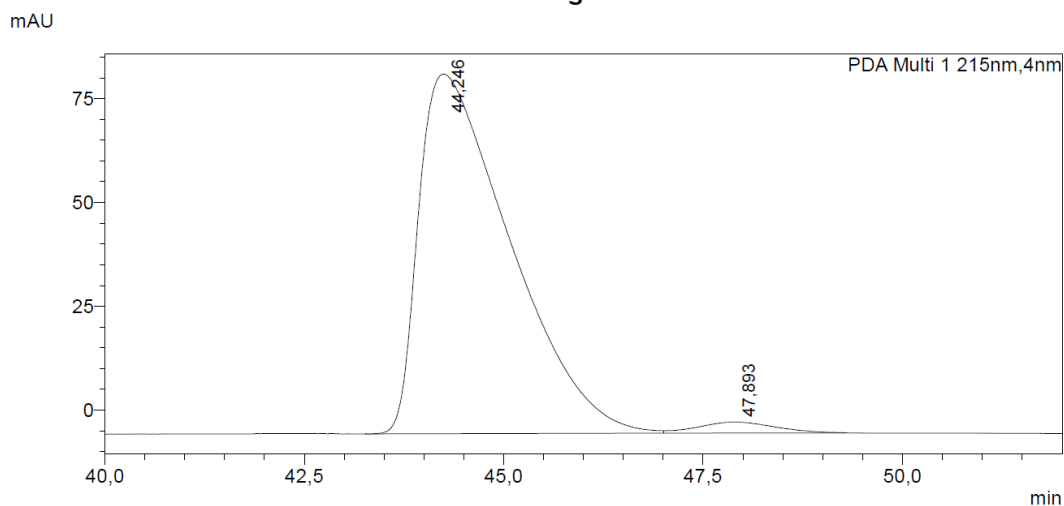

### Peak Table

| PDA Ch1 215nm |           |         |        |        |
|---------------|-----------|---------|--------|--------|
| Peak#         | Ret. Time | Area    | Height | Conc.  |
| 1             | 44,246    | 6896487 | 86593  | 97,511 |
| 2             | 47,893    | 176012  | 2635   | 2,489  |
| Total         |           | 7072499 | 89228  |        |

1

### Chromatogram

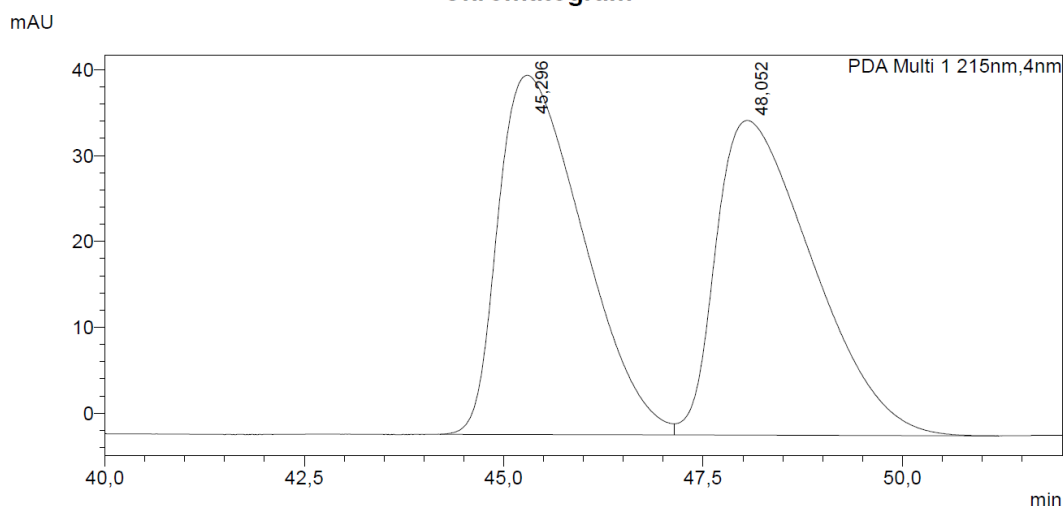

### Peak Table

| PDA Ch1 215nm |           |         |        |        |
|---------------|-----------|---------|--------|--------|
| Peak#         | Ret. Time | Area    | Height | Conc.  |
| 1             | 45,296    | 3093985 | 41843  | 49,979 |
| 2             | 48,052    | 3096525 | 36664  | 50,021 |
| Total         |           | 6190509 | 78507  |        |

2

3 **Supplementary Figure 64. HPLC spectra of (S)-5-Methyl-3-propylhexanoic acid (3e)**

4

5

### Chromatogram

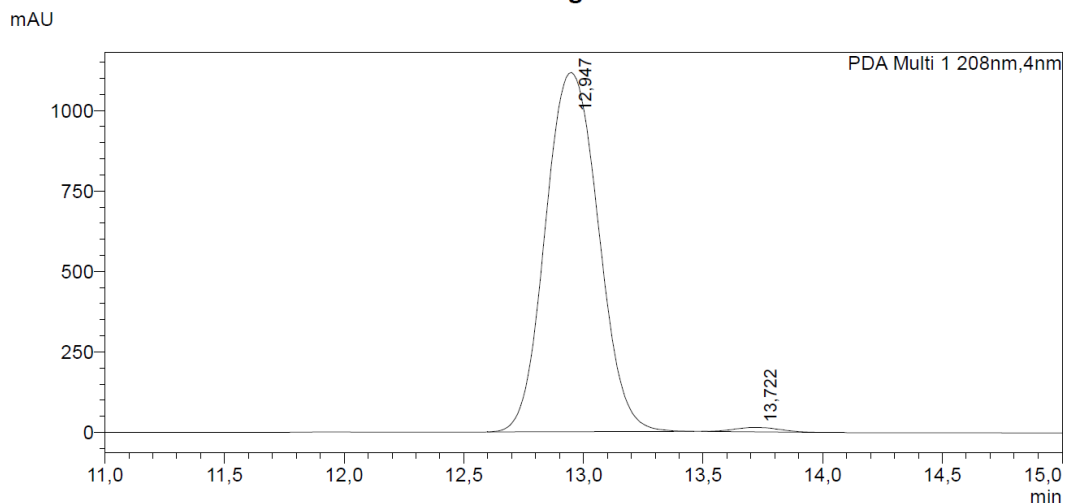

### Peak Table

| PDA Ch1 208nm |           |          |         |        |
|---------------|-----------|----------|---------|--------|
| Peak#         | Ret. Time | Area     | Height  | Conc.  |
| 1             | 12,947    | 17175110 | 1115729 | 98,932 |
| 2             | 13,722    | 185386   | 14069   | 1,068  |
| Total         |           | 17360495 | 1129798 |        |

1

### Chromatogram

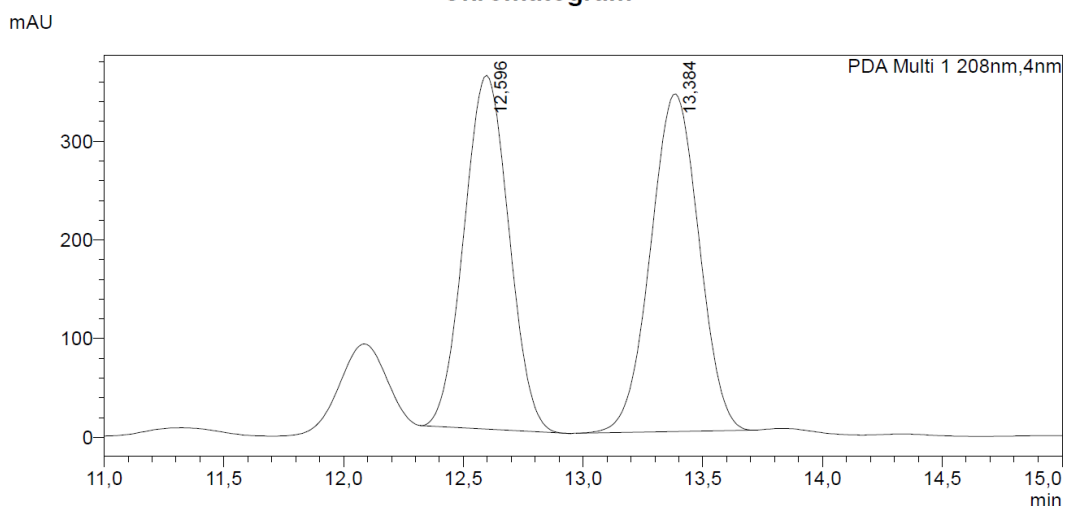

### Peak Table

| PDA Ch1 208nm |           |         |        |        |
|---------------|-----------|---------|--------|--------|
| Peak#         | Ret. Time | Area    | Height | Conc.  |
| 1             | 12,596    | 4664613 | 358074 | 49,250 |
| 2             | 13,384    | 4806597 | 342072 | 50,750 |
| Total         |           | 9471210 | 700146 |        |

2

3 **Supplementary Figure 65. HPLC spectra of (S)-6-Methyl-3-propylheptanoic acid (3f)**

4

5



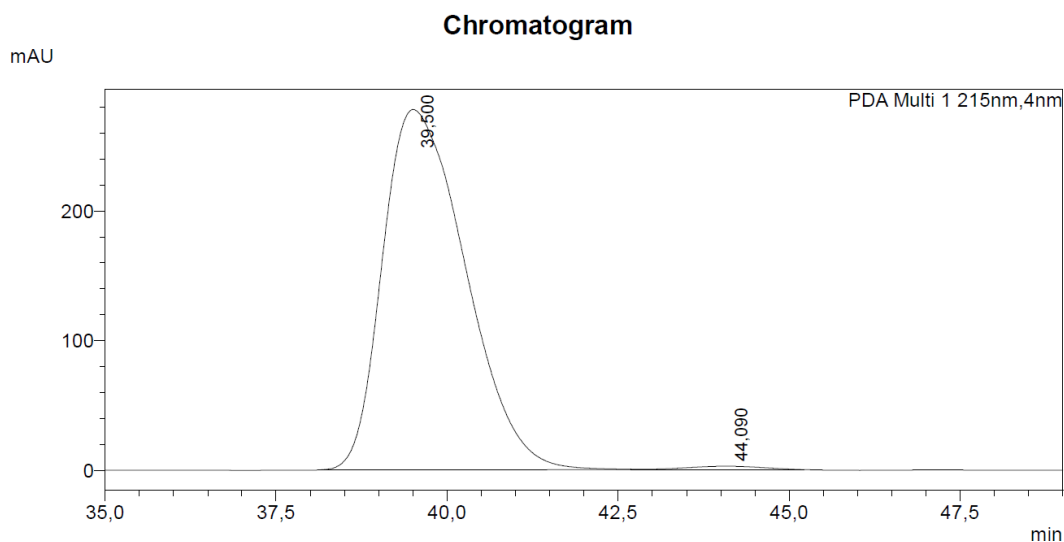

**Peak Table**

| PDA Ch1 215nm |           |          |        |        |
|---------------|-----------|----------|--------|--------|
| Peak#         | Ret. Time | Area     | Height | Conc.  |
| 1             | 39,500    | 23423708 | 277747 | 99,101 |
| 2             | 44,090    | 212381   | 2672   | 0,899  |
| Total         |           | 23636089 | 280419 |        |

1

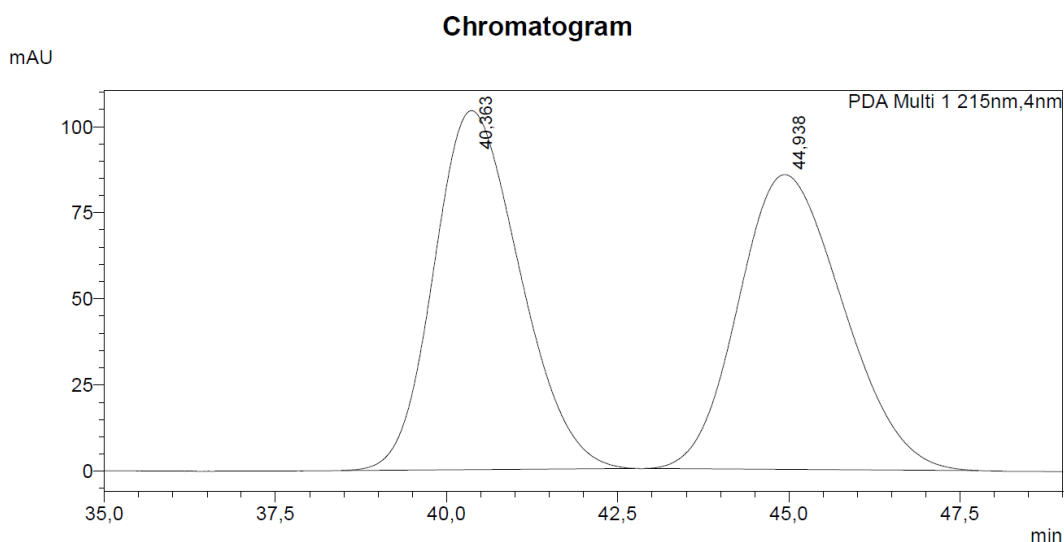

**Peak Table**

| PDA Ch1 215nm |           |          |        |        |
|---------------|-----------|----------|--------|--------|
| Peak#         | Ret. Time | Area     | Height | Conc.  |
| 1             | 40,363    | 9103386  | 104186 | 50,020 |
| 2             | 44,938    | 9096107  | 85552  | 49,980 |
| Total         |           | 18199493 | 189738 |        |

2

3 **Supplementary Figure 66. HPLC spectra of (S)-3-Propyl-oct-7-enoic acid (3g)**

4

5

### Chromatogram

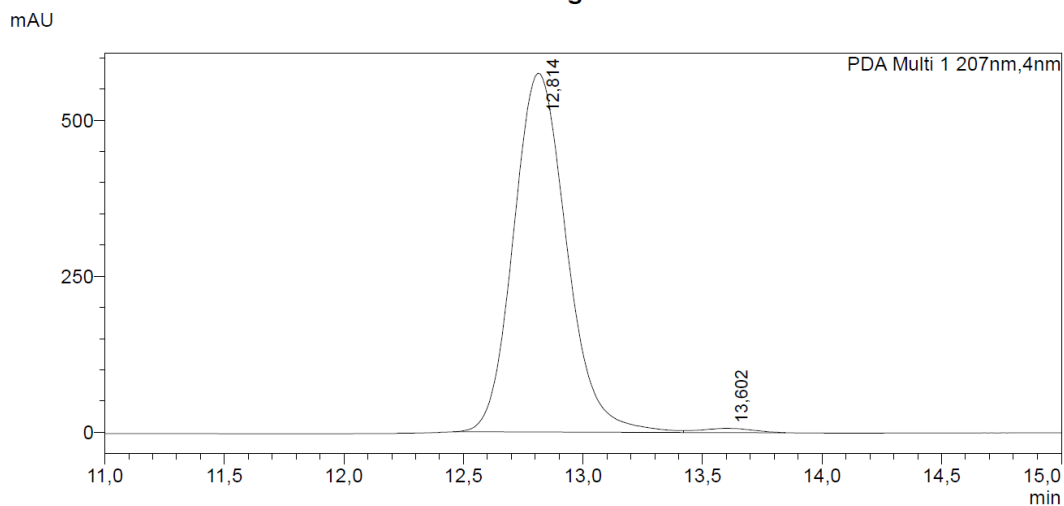

### Peak Table

| PDA Ch1 207nm |           |         |        |        |
|---------------|-----------|---------|--------|--------|
| Peak#         | Ret. Time | Area    | Height | Conc.  |
| 1             | 12,814    | 8854419 | 574479 | 98,897 |
| 2             | 13,602    | 98719   | 6771   | 1,103  |
| Total         |           | 8953138 | 581250 |        |

1

### Chromatogram

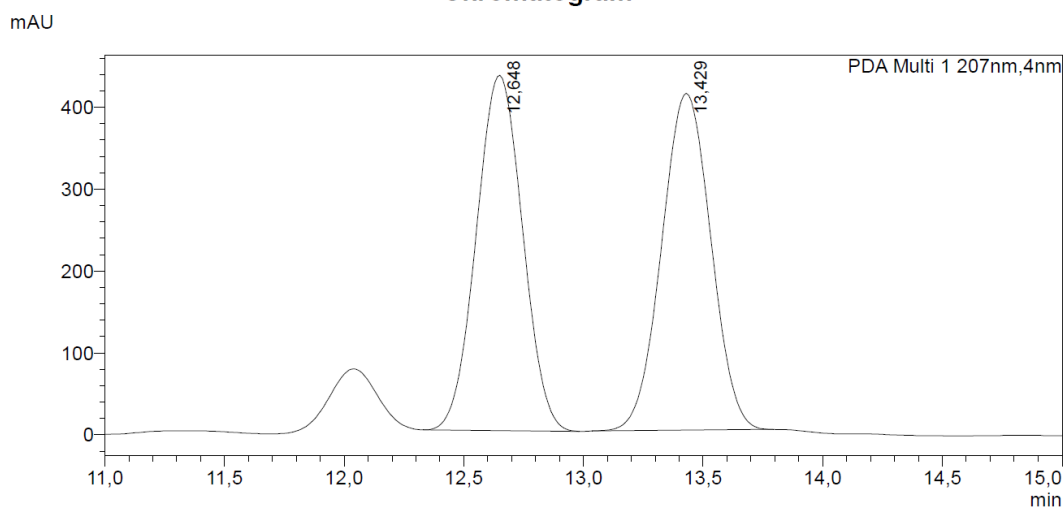

### Peak Table

| PDA Ch1 207nm |           |          |        |        |
|---------------|-----------|----------|--------|--------|
| Peak#         | Ret. Time | Area     | Height | Conc.  |
| 1             | 12,648    | 5834788  | 433674 | 49,807 |
| 2             | 13,429    | 5880066  | 411237 | 50,193 |
| Total         |           | 11714855 | 844911 |        |

2

3 **Supplementary Figure 67. HPLC spectra of (S)-3-Propylnonanoic acid (3h)**

4

5

### Chromatogram

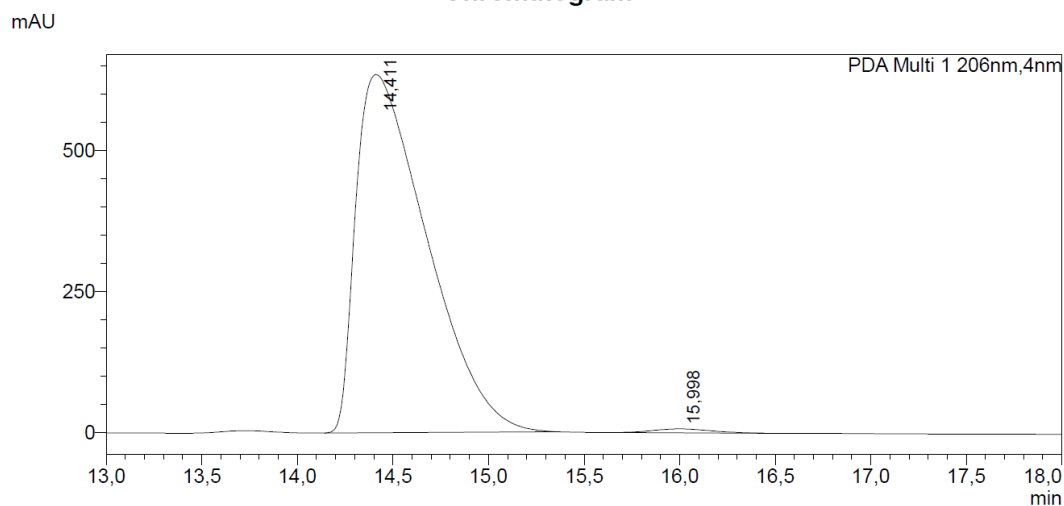

### Peak Table

| PDA Ch1 206nm |           |          |        |        |
|---------------|-----------|----------|--------|--------|
| Peak#         | Ret. Time | Area     | Height | Conc.  |
| 1             | 14,411    | 16426336 | 635145 | 99,151 |
| 2             | 15,998    | 140733   | 6831   | 0,849  |
| Total         |           | 16567068 | 641977 |        |

1

### Chromatogram

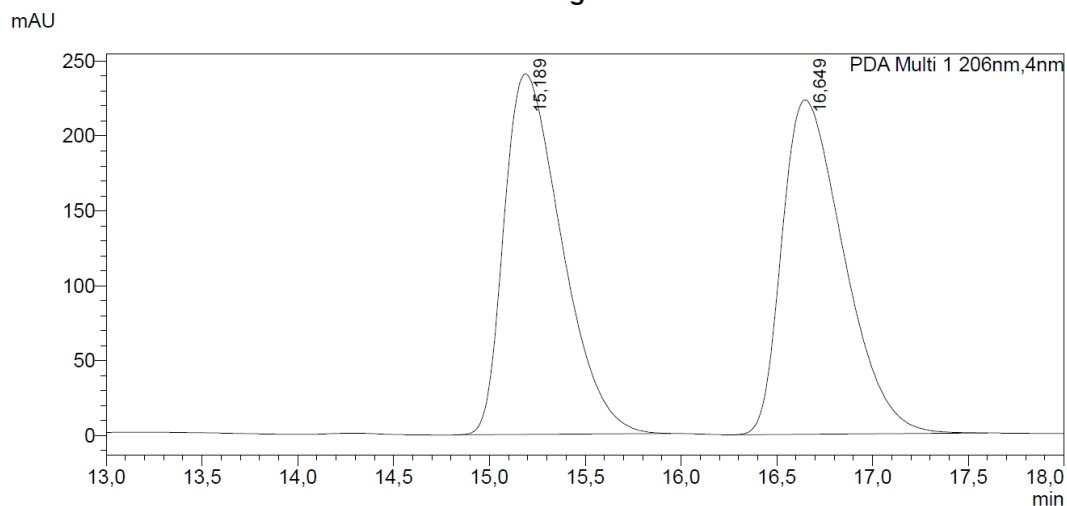

### Peak Table

| PDA Ch1 206nm |           |          |        |        |
|---------------|-----------|----------|--------|--------|
| Peak#         | Ret. Time | Area     | Height | Conc.  |
| 1             | 15,189    | 5035670  | 240895 | 50,113 |
| 2             | 16,649    | 5012931  | 223358 | 49,887 |
| Total         |           | 10048601 | 464253 |        |

2

3 **Supplementary Figure 68. HPLC spectra of (S)-3-Methylnonanoic acid (3i)**

4

5

### Chromatogram

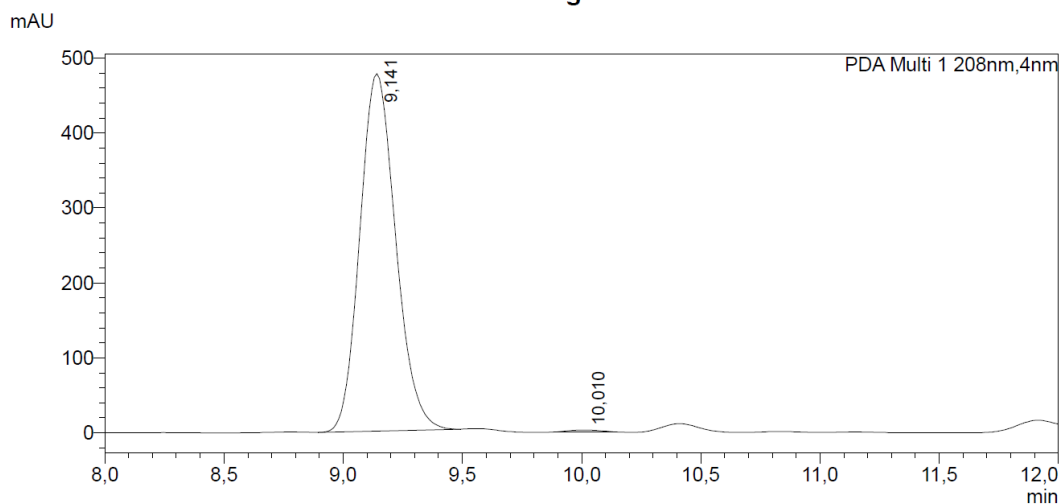

### Peak Table

| PDA Ch1 208nm |           |         |        |        |
|---------------|-----------|---------|--------|--------|
| Peak#         | Ret. Time | Area    | Height | Conc.  |
| 1             | 9,141     | 4983529 | 476943 | 99,555 |
| 2             | 10,010    | 22280   | 2577   | 0,445  |
| Total         |           | 5005809 | 479520 |        |

1

### Chromatogram

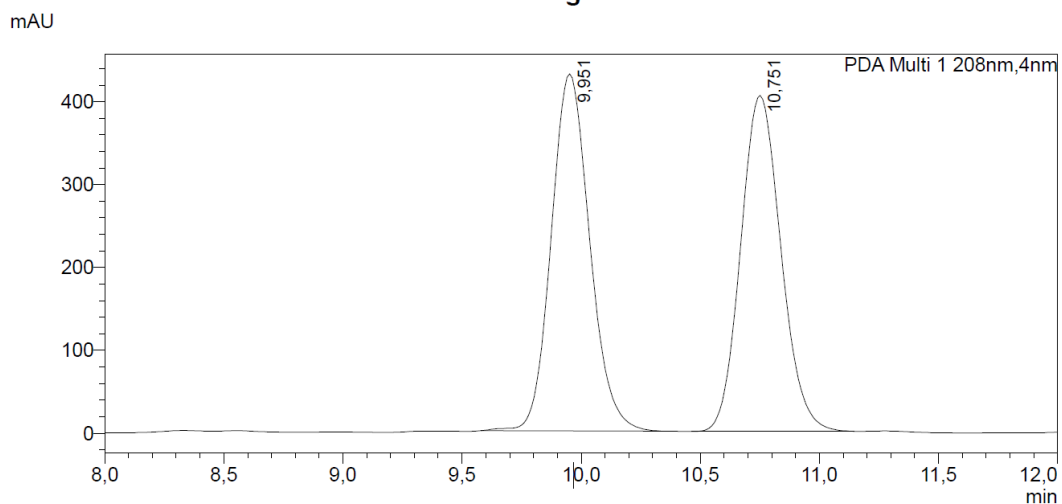

### Peak Table

| PDA Ch1 208nm |           |         |        |        |
|---------------|-----------|---------|--------|--------|
| Peak#         | Ret. Time | Area    | Height | Conc.  |
| 1             | 9,951     | 4844582 | 430981 | 50,416 |
| 2             | 10,751    | 4764569 | 405583 | 49,584 |
| Total         |           | 9609151 | 836565 |        |

2

3 **Supplementary Figure 69. HPLC spectra of (R)-(2-Bromo-1-methylethyl)benzene (4c)**

4

5

### Chromatogram

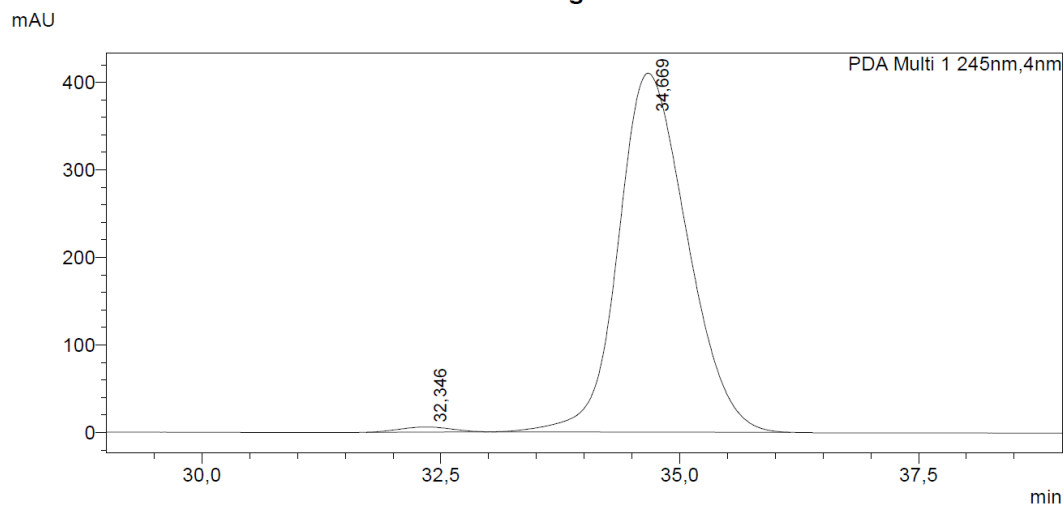

### Peak Table

| PDA Ch1 245nm |           |          |        |        |
|---------------|-----------|----------|--------|--------|
| Peak#         | Ret. Time | Area     | Height | Conc.  |
| 1             | 32,346    | 214620   | 5735   | 1,037  |
| 2             | 34,669    | 20489544 | 409965 | 98,963 |
| Total         |           | 20704164 | 415700 |        |

1

### Chromatogram

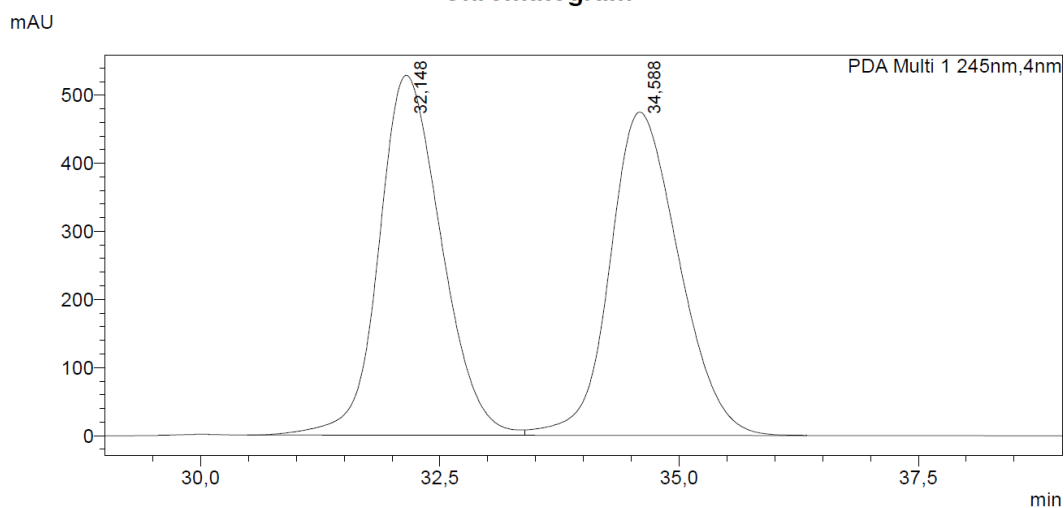

### Peak Table

| PDA Ch1 245nm |           |          |         |        |
|---------------|-----------|----------|---------|--------|
| Peak#         | Ret. Time | Area     | Height  | Conc.  |
| 1             | 32,148    | 23972280 | 528352  | 50,147 |
| 2             | 34,588    | 23831434 | 474482  | 49,853 |
| Total         |           | 47803714 | 1002834 |        |

2

3 **Supplementary Figure 70. HPLC spectra of (S)-1-(2-Propyl)octyl-4-phenyl-1H-1,2,3-**  
4 **triazole (4e)**

5

### Chromatogram

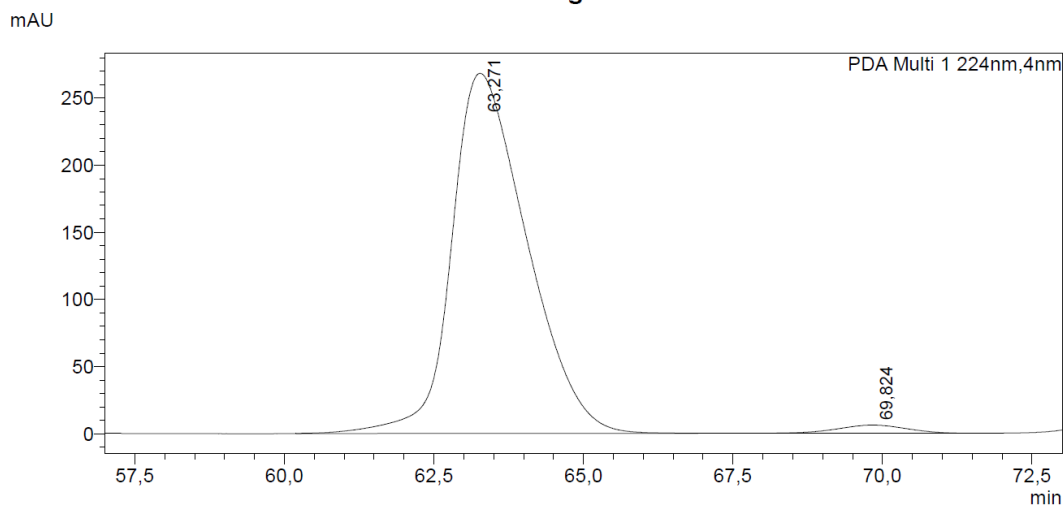

### Peak Table

| PDA Ch1 224nm |           |          |        |        |
|---------------|-----------|----------|--------|--------|
| Peak#         | Ret. Time | Area     | Height | Conc.  |
| 1             | 63,271    | 23488782 | 268092 | 97,946 |
| 2             | 69,824    | 492472   | 6103   | 2,054  |
| Total         |           | 23981253 | 274195 |        |

1

### Chromatogram

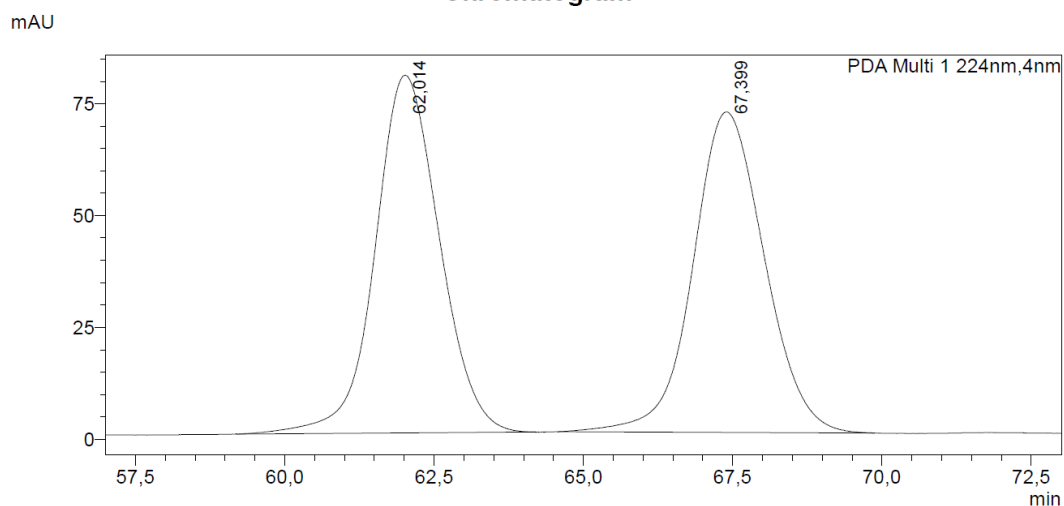

### Peak Table

| PDA Ch1 224nm |           |          |        |        |
|---------------|-----------|----------|--------|--------|
| Peak#         | Ret. Time | Area     | Height | Conc.  |
| 1             | 62,014    | 5995266  | 79959  | 50,101 |
| 2             | 67,399    | 5970995  | 71600  | 49,899 |
| Total         |           | 11966262 | 151559 |        |

2

3 **Supplementary Figure 71. HPLC spectra of (S)-4-(2-Ethylpentyl)phenol (4f)**

4

### Chromatogram

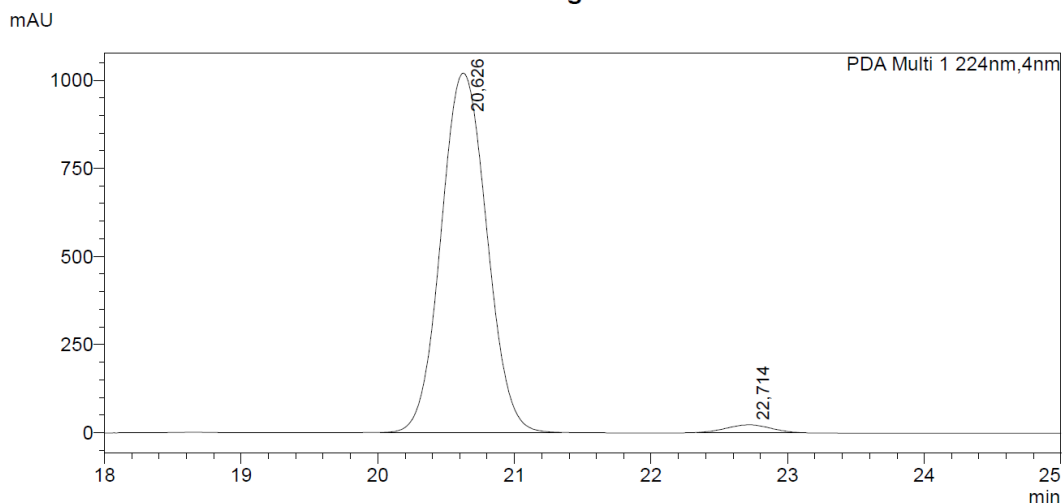

### Peak Table

| PDA Ch1 224nm |           |          |         |        |
|---------------|-----------|----------|---------|--------|
| Peak#         | Ret. Time | Area     | Height  | Conc.  |
| 1             | 20.626    | 23718719 | 1019381 | 98,035 |
| 2             | 22.714    | 475395   | 21733   | 1,965  |
| Total         |           | 24194114 | 1041113 |        |

1

### Chromatogram

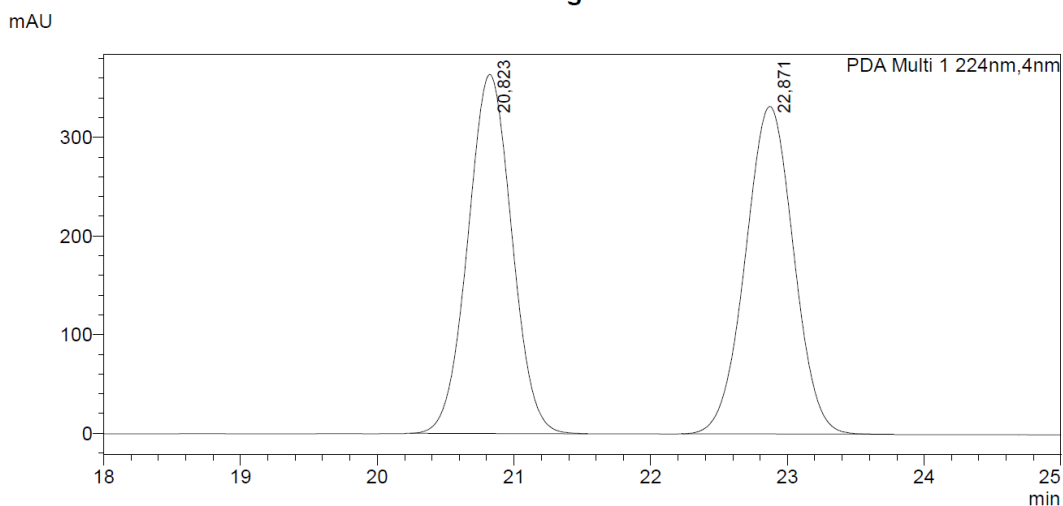

### Peak Table

| PDA Ch1 224nm |           |          |        |        |
|---------------|-----------|----------|--------|--------|
| Peak#         | Ret. Time | Area     | Height | Conc.  |
| 1             | 20.823    | 8129329  | 363780 | 49,953 |
| 2             | 22.871    | 8144600  | 332038 | 50,047 |
| Total         |           | 16273929 | 695818 |        |

2

3 **Supplementary Figure 72. HPLC spectra of (R)-2-(4-Methoxybenzyl)butan-1-ol (4g)**

4

5

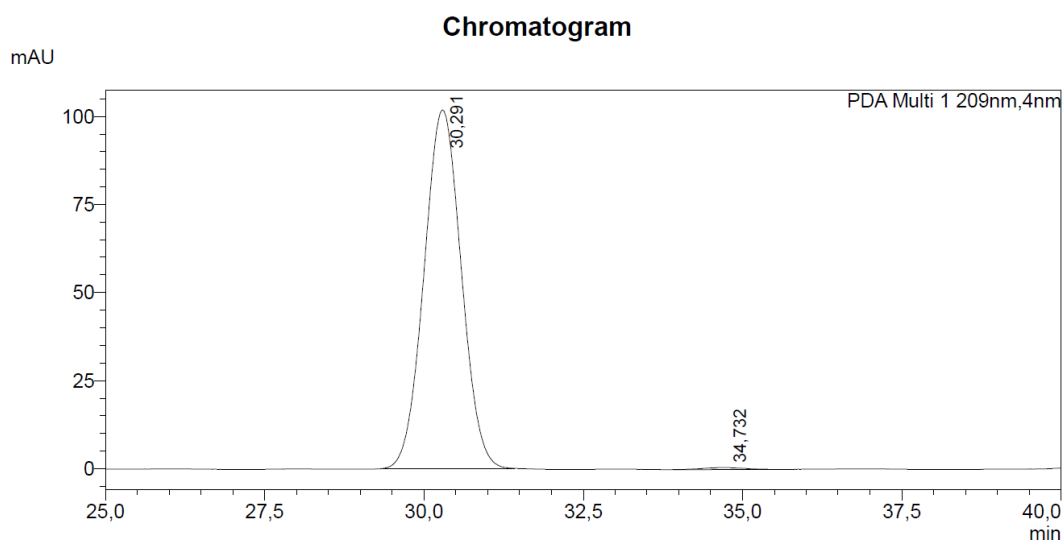

**Peak Table**

| PDA Ch1 209nm |           |         |        |        |
|---------------|-----------|---------|--------|--------|
| Peak#         | Ret. Time | Area    | Height | Conc.  |
| 1             | 30,291    | 4132695 | 101836 | 99,440 |
| 2             | 34,732    | 23264   | 537    | 0,560  |
| Total         |           | 4155960 | 102374 |        |

1

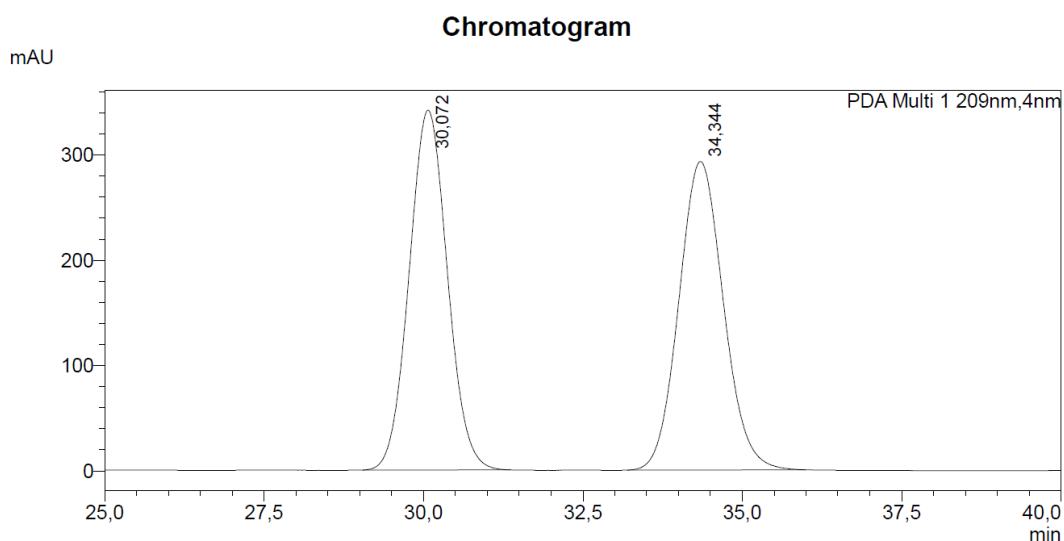

**Peak Table**

| PDA Ch1 209nm |           |          |        |        |
|---------------|-----------|----------|--------|--------|
| Peak#         | Ret. Time | Area     | Height | Conc.  |
| 1             | 30,072    | 14259050 | 341801 | 50,040 |
| 2             | 34,344    | 14236207 | 293063 | 49,960 |
| Total         |           | 28495257 | 634863 |        |

2

3 **Supplementary Figure 73. HPLC spectra of (R)-3-(4-hydroxy-3-(5,6,7,8-tetrahydro-**  
 4 **5,5,8,8-tetramethyl-3-pentyloxy-2-naphthalenyl)phenyl) butanoic acid (5b)**

5

6



### Chromatogram

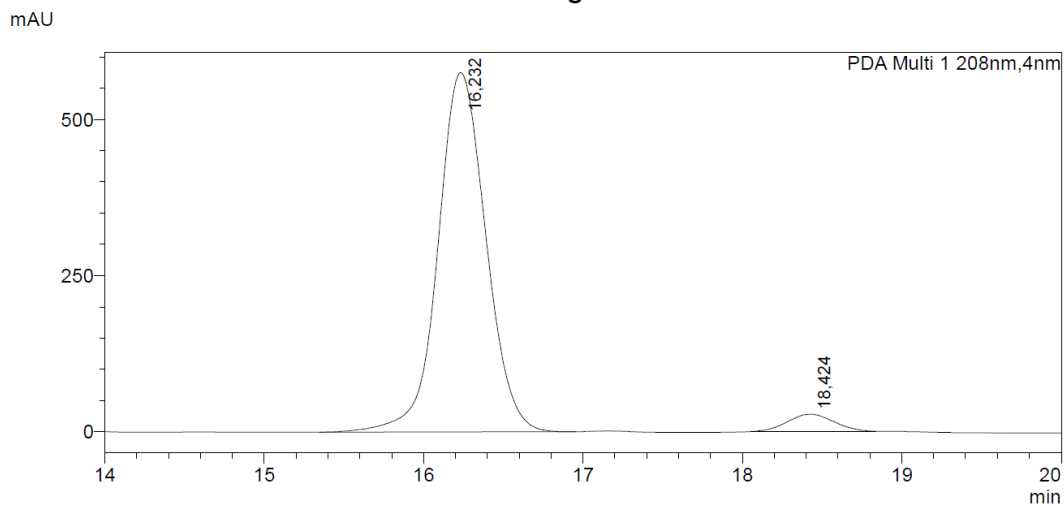

### Peak Table

| PDA Ch1 208nm |           |          |        |        |
|---------------|-----------|----------|--------|--------|
| Peak#         | Ret. Time | Area     | Height | Conc.  |
| 1             | 16,232    | 12020503 | 575129 | 95,585 |
| 2             | 18,424    | 555208   | 27516  | 4,415  |
| Total         |           | 12575711 | 602645 |        |

1

### Chromatogram

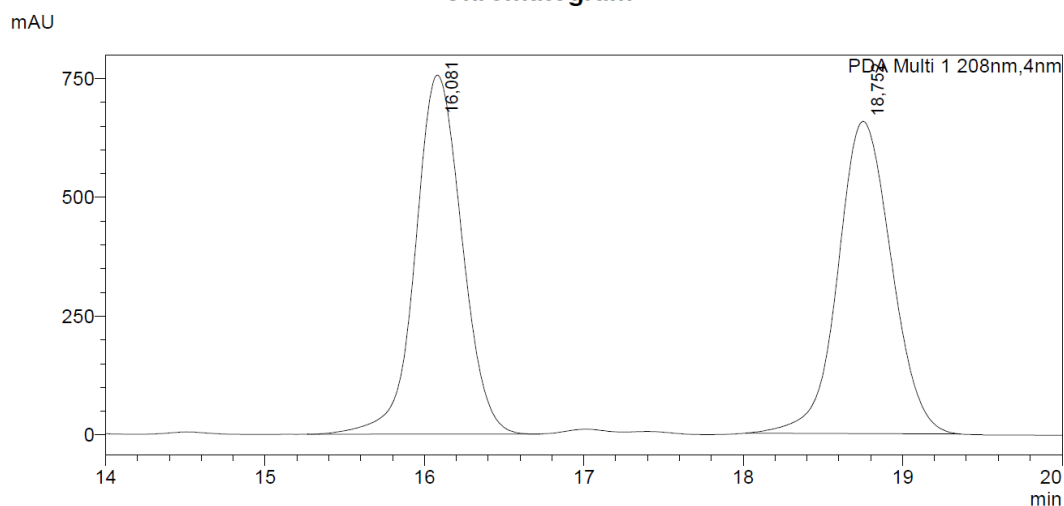

### Peak Table

| PDA Ch1 208nm |           |          |         |        |
|---------------|-----------|----------|---------|--------|
| Peak#         | Ret. Time | Area     | Height  | Conc.  |
| 1             | 16,081    | 15330706 | 754836  | 49,969 |
| 2             | 18,752    | 15349591 | 656953  | 50,031 |
| Total         |           | 30680297 | 1411789 |        |

2

3 **Supplementary Figure 74. HPLC spectra of (1R,2R)-2-Ethylcyclopentane-1-carboxylic**  
4 **acid (6)**

5

6

### Chromatogram

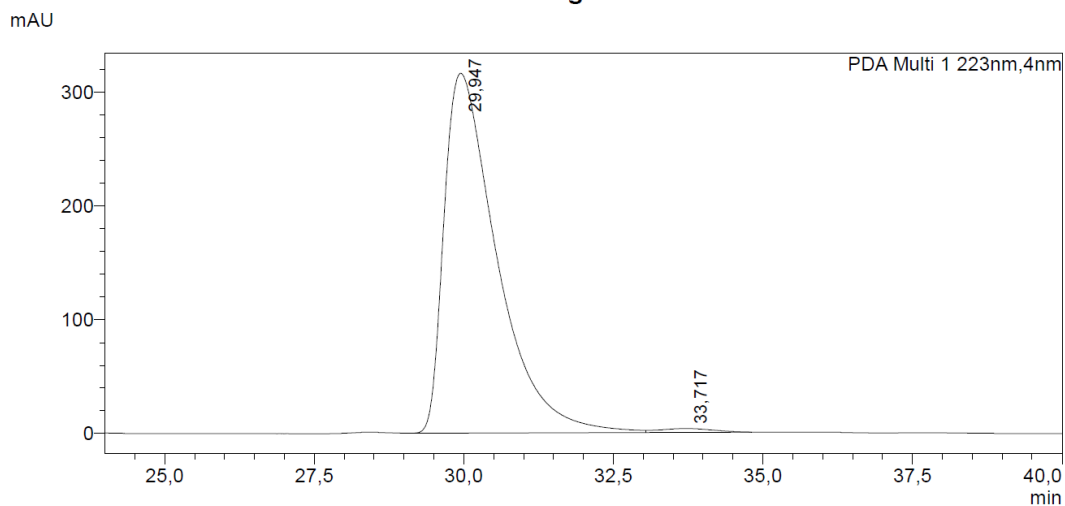

### Peak Table

| PDA Ch1 223nm |           |          |        |        |
|---------------|-----------|----------|--------|--------|
| Peak#         | Ret. Time | Area     | Height | Conc.  |
| 1             | 29,947    | 19423784 | 316323 | 98,930 |
| 2             | 33,717    | 210142   | 3396   | 1,070  |
| Total         |           | 19633926 | 319719 |        |

1

### Chromatogram

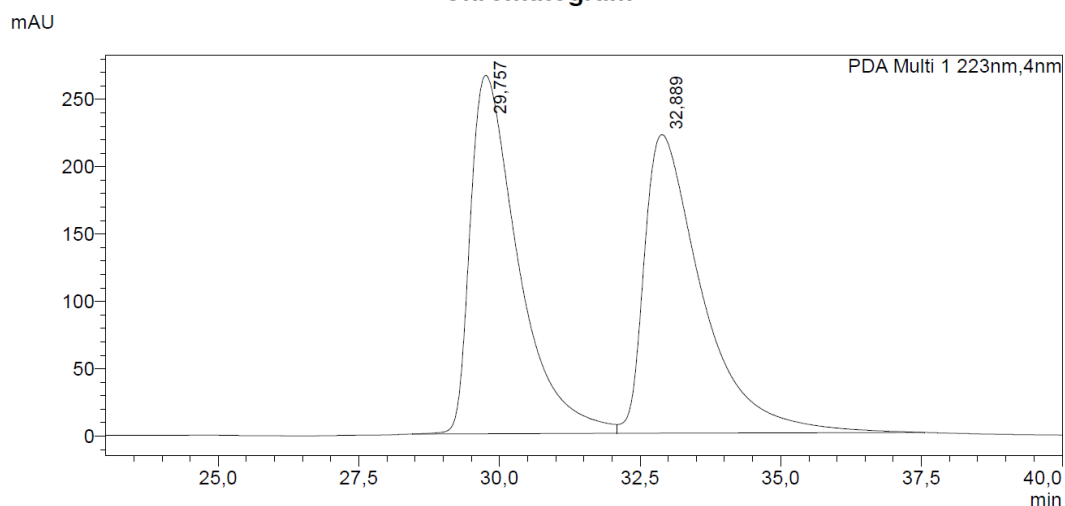

### Peak Table

| PDA Ch1 223nm |           |          |        |        |
|---------------|-----------|----------|--------|--------|
| Peak#         | Ret. Time | Area     | Height | Conc.  |
| 1             | 29,757    | 15787721 | 266010 | 49,815 |
| 2             | 32,889    | 15905134 | 221652 | 50,185 |
| Total         |           | 31692855 | 487662 |        |

2

3 **Supplementary Figure 75. HPLC spectra of (S)-Ethyl 6-chloro-3-(3-methylnonyl)-**  
4 **1H-indole-2-carboxylate (7b)**

5

6

## 1 Supplementary References

- 2 1. Rodríguez-Fernández, M., Yan, X., Collados, J. F., White, P. B. & Harutyunyan, S. R. Lewis acid  
3 enabled copper-catalyzed asymmetric synthesis of chiral  $\beta$ -substituted amides. *J. Am. Chem. Soc.* **139**,  
4 14224–14231 (2017).
- 5 2. Broggi, J., Urbina-Blanco, C. A., Clavier, H., Leitgeb, A., Slugovc, C., Slawin, A. M. Z. & Nolan, S.  
6 P. The influence of phosphane ligands on the versatility of Ruthenium-indenylidene complexes in  
7 metathesis. *Chem. Eur. J.* **16**, 9215–9225 (2010).
- 8 3. Concellón, J. M. & Concellón, C. Direct reaction of dibromoacetic acid with aldehydes promoted by  
9 Samarium diiodide: an easy, efficient, and rapid synthesis of (*E*)- $\alpha,\beta$ -unsaturated carboxylic acids with  
10 total stereoselectivity. *J. Org. Chem.* **71**, 1728–1731 (2006).
- 11 4. Hird, A. W. & Hoveyda, A. H. Cu-catalyzed enantioselective conjugate additions of alkyl zinc  
12 reagents to unsaturated N-acyloxazolidinones promoted by a chiral triamide phosphane. *Angew. Chem.*  
13 *Int. Ed.* **42**, 1276–1279 (2003).
- 14 5. García, J. M., González, A., Kardak, B. G., Odriozola, J. M., Oiarbide, M., Razkin, J. & Palomo, C.  
15 Copper-catalyzed enantioselective conjugate addition of dialkylzinc reagents to  $\alpha'$ -oxy enones. *Chem.*  
16 *Eur. J.* **14**, 8768–8771 (2008).
- 17 6. Deasy, R. E., Brossat, M., Moody, T. S. & Maguire, A. R. Lipase catalysed kinetic resolutions of 3-  
18 aryl alkanolic acids. *Tetrahedron: Asymmetry* **22**, 47–61 (2011).
- 19 7. Derosa, J., Tran, V. T., Boulous, M. N., Chen, J. S. & Engle, K. M. Nickel-catalyzed  $\beta,\gamma$ -  
20 dicarbofunctionalization of alkenyl carbonyl compounds via conjunctive cross-coupling. *J. Am. Chem.*  
21 *Soc.* **139**, 10657–10660 (2017).
- 22 8. Norsikian, S., Marek, I., Klein, S., Poisson, J. F. & Normant, J. F. Enantioselective carbometalation of  
23 cinnamyl derivatives: new access to chiral disubstituted cyclopropanes-configurational stability of  
24 benzylic organozinc halides. *Chem. Eur. J.* **5**, 2055–2068 (1999).
- 25 9. Yuan, P., Chen, J., Zhao, J., & Huang, Y. Enantioselective hydroamidation of enals by trapping of a  
26 transient acyl species. *Angew. Chem. Int. Ed.* **57**, 8503–8507 (2018).
- 27 10. Chen, B., Cao, P., Liao, Y., Wang, M. & Liao, J. Enantioselective copper-catalyzed methylboration of  
28 alkenes. *Org. Lett.* **20**, 1346–1349 (2018).
- 29 11. Qin, T., Cornella, J., Li, C., Malins, L. R., Edwards, J. T., Kawamura, S., Maxwell, B. D., Eastgate, M.  
30 D. & Baran, P. S. A general alkyl-alkyl cross-coupling enabled by redox-active esters and alkylzinc  
31 reagents. *Science* **352**, 801–805 (2016).
- 32 12. Li, C., Wang, J., Barton, L. M., Yu, S., Tian, M., Peters, D. S., Kumar, M., Yu, A. W., Johnson, K. A.,  
33 Chatterjee, A. K., Yan, M. & Baran, P. S. Decarboxylative borylation. *Science* **356**, 1045 (2017).
- 34 13. Tamao K., Yoshida, J., Akita, M., Sugihara, Y., Iwahara, T. & Kumada, M. Organofluorosilicates in  
35 organic synthesis. XVI. synthesis of organopentafluorosilicates via the Diels-Alder, ene, and Friedel-  
36 Crafts reaction. Their transformations to organic halides and alcohols. *Bull. Chem. Soc. Jpn.* **55**, 255–  
37 260 (1982).
- 38 14. Ozawa, J. & Kanai, M. Silver-catalyzed C(*sp*<sup>3</sup>)-H chlorination. *Org. Lett.* **19**, 1430–1433 (2017).
- 39 15. Tan, X., Song, T., Wang, Z., Chen, H., Cui, L. & Li, C. Silver-catalyzed decarboxylative bromination  
40 of aliphatic carboxylic acids. *Org. Lett.* **19**, 1634–1637 (2017)

- 1 16. Raushel, J., Pitram, S. M. & Fokin, V. V. Efficient synthesis of sulfonyl azides from sulfonamides.  
2 *Org. Lett.* **10**, 3385–3388 (2008).
- 3 17. Xing, Y., Cheng, B., Wang, J., Lu, P. & Wang, Y. Copper-catalyzed three-component synthesis of 3-  
4 aminopyrazoles and 4-iminopyrimidines via  $\beta$ -alkynyl-N-sulfonyl ketenimine intermediates. *Org. Lett.*  
5 **16**, 4814–4817 (2014).
- 6 18. Zhu, Y., Li, X., Wang, X., Huang, X., Shen, T., Zhang, Y., Sun, X., Zou, M., Song, S. & Jiao, N.  
7 Silver-catalyzed decarboxylative azidation of aliphatic carboxylic acids. *Org. Lett.* **17**, 4702–4705  
8 (2015).
- 9 19. Lu, X., Ge, L., Cheng, C., Chen, J., Cao, W. & Wu, X. Enantioselective cascade reaction for synthesis  
10 of quinolinones via synergistic catalysis using Cu-Pybox and chiral benzotetramisole as catalysts.  
11 *Chem. Eur. J.* **23**, 7689–7693 (2017).
- 12 20. Waghmode, S. B., Mahale, G., Patil, V. P., Renalson, K. & Singh, D. Efficient method for  
13 demethylation of aryl methyl ether using Aliquat-336. *Synth. Commun.* **43**, 3272–3280 (2013).
- 14 21. Cano, R., Yus, M. & Ramón, D. J. First practical cross-alkylation of primary alcohols with a new and  
15 recyclable impregnated iridium on magnetite catalyst. *Chem. Commun.* **48**, 7628–7630 (2012).
- 16 22. Jang, W. J., Song, S. M., Moon, J. H., Lee, J. Y. & Yun, J. Copper-catalyzed enantioselective  
17 hydroboration of unactivated 1,1-disubstituted alkenes. *J. Am. Chem. Soc.* **139**, 13660–13663 (2017).
- 18 23. Eleftheriadis, N., Neochoritis, C. G., Leus, N. G. J., van der Wouden, P. E., Dömling, A. & Dekker, F.  
19 J. Rational development of a potent 15-lipoxygenase-1 inhibitor with *in vitro* and *ex vivo* anti-  
20 inflammatory properties. *J. Med. Chem.* **58**, 7850–7862 (2015).
- 21 24. Sasaki, M., Ando, M., Kawahata, M., Yamaguchi, K. & Takeda, K. Spontaneous oxygenation of  
22 siloxy-N-silylketenimines to  $\alpha$ -ketoamides. *Org. Lett.* **18**, 1598–1601 (2016).
- 23
